# Supplementary material for: Spatial patterning of liver progenitor cell differentiation mediated by cellular contractility and Notch signaling
Source: eLife journal article supplement (doi:10.7554/elife.38536), 2018-12-27
Supplement: supp [file elife-38536-supp-v1.zip]

Archive with 32 entries (32 files):
- elife_poa_e38536_Source_code_6.m
- elife_poa_e38536_Figure_4_figure_supplement_1.png
- elife_poa_e38536_Source_code_9.m
- elife_poa_e38536_Source_code_11.m
- elife_poa_e38536_Source_code_3.m
- elife_poa_e38536_Source_code_1.m
- elife_poa_e38536_Source_code_7.m
- elife_poa_e38536_Figure_2_source_data_2.csv
- elife_poa_e38536_Figure_6_source_data_1.csv
- elife_poa_e38536_Figure_3_figure_supplement_2.png
- elife_poa_e38536_Figure_7_source_data_1.csv
- elife_poa_e38536_Figure_1_figure_supplement_1.png
- elife_poa_e38536_Source_code_8.mph
- elife_poa_e38536_Figure_4_figure_supplement_2.png
- elife_poa_e38536_Figure_3_figure_supplement_1.png
- elife_poa_e38536_Figure_3_source_data_1.csv
- elife_poa_e38536_Figure_2_figure_supplement_3.png
- elife_poa_e38536_Source_code_2.m
- elife_poa_e38536_Figure_1_source_data_1.csv
- elife_poa_e38536_Figure_7_figure_supplement_1.png
- elife_poa_e38536_Figure_1_figure_supplement_3.png
- elife_poa_e38536_Transparent_Reporting_File.pdf
- elife_poa_e38536_Figure_2_figure_supplement_2.png
- elife_poa_e38536_Figure_7_source_data_2.csv
- elife_poa_e38536_Figure_2_source_data_1.csv
- elife_poa_e38536_Figure_6_source_data_1.csv
- elife_poa_e38536_Source_code_4.m
- elife_poa_e38536_Figure_1_figure_supplement_2.png
- elife_poa_e38536_Source_code_5.m
- elife_poa_e38536_Source_code_10.m
- elife_poa_e38536_Figure_1_source_data_2.csv
- elife_poa_e38536_Figure_2_figure_supplement_1.png
