# Supplementary material for: Spatial patterning of liver progenitor cell differentiation mediated by cellular contractility and Notch signaling
Source: eLife journal article supplement (doi:10.7554/elife.38536), 2018-12-27
Supplement: supp [file elife-38536-supp-v1.zip › elife_poa_e38536_Figure_1_source_data_1.csv]

	Condition	Radius (dimensionless)	OPN cell count
1	IgG	0	0
2	IgG	0.033	0
3	IgG	0.067	0
4	IgG	0.1	0.167
5	IgG	0.133	0
6	IgG	0.167	0
7	IgG	0.2	0
8	IgG	0.233	0
9	IgG	0.267	0
10	IgG	0.3	0.333
11	IgG	0.333	0.167
12	IgG	0.367	0
13	IgG	0.4	0
14	IgG	0.433	0
15	IgG	0.467	0.5
16	IgG	0.5	0.5
17	IgG	0.533	0.167
18	IgG	0.567	0.333
19	IgG	0.6	0.5
20	IgG	0.633	0.833
21	IgG	0.667	1
22	IgG	0.7	1.333
23	IgG	0.733	2.833
24	IgG	0.767	1.5
25	IgG	0.8	3
26	IgG	0.833	5.667
27	IgG	0.867	8.167
28	IgG	0.9	8.333
29	IgG	0.933	8.167
30	IgG	0.967	6.333
31	IgG	1	5.333
53	DLL1	0	0
54	DLL1	0.033	0
55	DLL1	0.067	0
56	DLL1	0.1	0
57	DLL1	0.133	0.167
58	DLL1	0.167	0.167
59	DLL1	0.2	0
60	DLL1	0.233	0
61	DLL1	0.267	0
62	DLL1	0.3	0.333
63	DLL1	0.333	0.333
64	DLL1	0.367	0.5
65	DLL1	0.4	1.167
66	DLL1	0.433	0.667
67	DLL1	0.467	0
68	DLL1	0.5	0
69	DLL1	0.533	0.167
70	DLL1	0.567	0.333
71	DLL1	0.6	0.667
72	DLL1	0.633	1.167
73	DLL1	0.667	0.333
74	DLL1	0.7	1.333
75	DLL1	0.733	2
76	DLL1	0.767	3.167
77	DLL1	0.8	8.667
78	DLL1	0.833	11.333
79	DLL1	0.867	14.333
80	DLL1	0.9	16.5
81	DLL1	0.933	14.333
82	DLL1	0.967	10.167
83	DLL1	1	5.333
129	DLL4	0	0
130	DLL4	0.033	0.167
131	DLL4	0.067	0.167
132	DLL4	0.1	0.167
133	DLL4	0.133	0.5
134	DLL4	0.167	0.5
135	DLL4	0.2	1
136	DLL4	0.233	0.5
137	DLL4	0.267	1
138	DLL4	0.3	1.5
139	DLL4	0.333	1.833
140	DLL4	0.367	1.5
141	DLL4	0.4	1.833
142	DLL4	0.433	2.167
143	DLL4	0.467	2
144	DLL4	0.5	5.667
145	DLL4	0.533	4.667
146	DLL4	0.567	8.833
147	DLL4	0.6	9
148	DLL4	0.633	10
149	DLL4	0.667	15.167
150	DLL4	0.7	17.167
151	DLL4	0.733	20
152	DLL4	0.767	28.333
153	DLL4	0.8	32.667
154	DLL4	0.833	42
155	DLL4	0.867	52.833
156	DLL4	0.9	55.667
157	DLL4	0.933	49.667
158	DLL4	0.967	42.667
159	DLL4	1	20.833
192	JAG1	0	0
193	JAG1	0.033	0.167
194	JAG1	0.067	0
195	JAG1	0.1	0.833
196	JAG1	0.133	1
197	JAG1	0.167	1.333
198	JAG1	0.2	1
199	JAG1	0.233	2.333
200	JAG1	0.267	2.5
201	JAG1	0.3	2.667
202	JAG1	0.333	1.333
203	JAG1	0.367	3.5
204	JAG1	0.4	4.333
205	JAG1	0.433	6.5
206	JAG1	0.467	5.833
207	JAG1	0.5	8.5
208	JAG1	0.533	9.167
209	JAG1	0.567	14.333
210	JAG1	0.6	15.5
211	JAG1	0.633	18.833
212	JAG1	0.667	23.667
213	JAG1	0.7	24.833
214	JAG1	0.733	22.667
215	JAG1	0.767	25
216	JAG1	0.8	27.167
217	JAG1	0.833	33
218	JAG1	0.867	38
219	JAG1	0.9	36.167
220	JAG1	0.933	39.5
221	JAG1	0.967	22.167
222	JAG1	1	13.833
