# Supplementary material for: Spatial patterning of liver progenitor cell differentiation mediated by cellular contractility and Notch signaling
Source: eLife journal article supplement (doi:10.7554/elife.38536), 2018-12-27
Supplement: supp [file elife-38536-supp-v1.zip › elife_poa_e38536_Figure_1_source_data_2.csv]

	Condition	Radius (dimensionless)	ALB cell count
1	IgG	0	0.667
2	IgG	0.033	0.833
3	IgG	0.067	1.5
4	IgG	0.1	1.333
5	IgG	0.133	2.167
6	IgG	0.167	3
7	IgG	0.2	2.667
8	IgG	0.233	2.333
9	IgG	0.267	4.667
10	IgG	0.3	5.5
11	IgG	0.333	5.667
12	IgG	0.367	7.167
13	IgG	0.4	6.833
14	IgG	0.433	7.667
15	IgG	0.467	6.833
16	IgG	0.5	7.333
17	IgG	0.533	8.333
18	IgG	0.567	7.667
19	IgG	0.6	7.5
20	IgG	0.633	8.5
21	IgG	0.667	8.333
22	IgG	0.7	7.833
23	IgG	0.733	10.333
24	IgG	0.767	14.5
25	IgG	0.8	11.5
26	IgG	0.833	11.167
27	IgG	0.867	10.333
28	IgG	0.9	9.667
29	IgG	0.933	7.833
30	IgG	0.967	6.833
31	IgG	1	1.333
64	DLL1	0	0.167
65	DLL1	0.033	0.667
66	DLL1	0.067	2.5
67	DLL1	0.1	3.167
68	DLL1	0.133	3
69	DLL1	0.167	5.333
70	DLL1	0.2	4.167
71	DLL1	0.233	4.667
72	DLL1	0.267	6.833
73	DLL1	0.3	6
74	DLL1	0.333	8.333
75	DLL1	0.367	7.833
76	DLL1	0.4	8.5
77	DLL1	0.433	8.667
78	DLL1	0.467	10.333
79	DLL1	0.5	10.333
80	DLL1	0.533	9.667
81	DLL1	0.567	7.5
82	DLL1	0.6	8.667
83	DLL1	0.633	12.667
84	DLL1	0.667	9.5
85	DLL1	0.7	9.5
86	DLL1	0.733	8.167
87	DLL1	0.767	8.333
88	DLL1	0.8	8.167
89	DLL1	0.833	9
90	DLL1	0.867	9.833
91	DLL1	0.9	9.167
92	DLL1	0.933	5.333
93	DLL1	0.967	3.167
94	DLL1	1	0.833
129	DLL4	0	0.667
130	DLL4	0.033	1.833
131	DLL4	0.067	3.167
132	DLL4	0.1	4.167
133	DLL4	0.133	5
134	DLL4	0.167	7.5
135	DLL4	0.2	8.667
136	DLL4	0.233	8.667
137	DLL4	0.267	9.667
138	DLL4	0.3	11.833
139	DLL4	0.333	11.167
140	DLL4	0.367	12.667
141	DLL4	0.4	15.167
142	DLL4	0.433	14.333
143	DLL4	0.467	17
144	DLL4	0.5	16.5
145	DLL4	0.533	12.833
146	DLL4	0.567	16.167
147	DLL4	0.6	16.167
148	DLL4	0.633	16.167
149	DLL4	0.667	15.667
150	DLL4	0.7	15.833
151	DLL4	0.733	13.667
152	DLL4	0.767	12.333
153	DLL4	0.8	9.667
154	DLL4	0.833	9.667
155	DLL4	0.867	4.667
156	DLL4	0.9	5.333
157	DLL4	0.933	1
158	DLL4	0.967	1
159	DLL4	1	0.167
195	JAG1	0	0.333
196	JAG1	0.033	2.5
197	JAG1	0.067	4.167
198	JAG1	0.1	5.167
199	JAG1	0.133	6
200	JAG1	0.167	9.833
201	JAG1	0.2	10.5
202	JAG1	0.233	12.833
203	JAG1	0.267	11.833
204	JAG1	0.3	11.833
205	JAG1	0.333	13
206	JAG1	0.367	14
207	JAG1	0.4	16.167
208	JAG1	0.433	18.167
209	JAG1	0.467	18.5
210	JAG1	0.5	15.333
211	JAG1	0.533	22.833
212	JAG1	0.567	18.833
213	JAG1	0.6	19
214	JAG1	0.633	21.667
215	JAG1	0.667	18.833
216	JAG1	0.7	16.667
217	JAG1	0.733	19.5
218	JAG1	0.767	14.667
219	JAG1	0.8	12.167
220	JAG1	0.833	10.5
221	JAG1	0.867	10.833
222	JAG1	0.9	6.167
223	JAG1	0.933	3.333
224	JAG1	0.967	1.667
225	JAG1	1	0.167
