# Supplementary material for: Spatial patterning of liver progenitor cell differentiation mediated by cellular contractility and Notch signaling
Source: eLife journal article supplement (doi:10.7554/elife.38536), 2018-12-27
Supplement: supp [file elife-38536-supp-v1.zip › elife_poa_e38536_Figure_2_source_data_1.csv]

	Condition	Radius (dimensionless)	Treatment	Substrate stiffness	OPN cell count
1	IgG	0	DMSO	30 kPa	0
2	IgG	0	DMSO	4 kPa	0
3	IgG	0	GSI	30 kPa	0
4	IgG	0	GSI	4 kPa	0
5	IgG	0.033	DMSO	30 kPa	0
6	IgG	0.033	DMSO	4 kPa	0
7	IgG	0.033	GSI	30 kPa	0
8	IgG	0.033	GSI	4 kPa	0
9	IgG	0.067	DMSO	30 kPa	0
10	IgG	0.067	DMSO	4 kPa	0
11	IgG	0.067	GSI	30 kPa	0
12	IgG	0.067	GSI	4 kPa	0
13	IgG	0.1	DMSO	30 kPa	0
14	IgG	0.1	DMSO	4 kPa	0
15	IgG	0.1	GSI	30 kPa	0
16	IgG	0.1	GSI	4 kPa	0
17	IgG	0.133	DMSO	30 kPa	0
18	IgG	0.133	DMSO	4 kPa	0
19	IgG	0.133	GSI	30 kPa	0
20	IgG	0.133	GSI	4 kPa	0
21	IgG	0.167	DMSO	30 kPa	0
22	IgG	0.167	DMSO	4 kPa	0
23	IgG	0.167	GSI	30 kPa	0
24	IgG	0.167	GSI	4 kPa	0
25	IgG	0.2	DMSO	30 kPa	0
26	IgG	0.2	DMSO	4 kPa	0
27	IgG	0.2	GSI	30 kPa	0
28	IgG	0.2	GSI	4 kPa	0
29	IgG	0.233	DMSO	30 kPa	0
30	IgG	0.233	DMSO	4 kPa	0
31	IgG	0.233	GSI	30 kPa	0
32	IgG	0.233	GSI	4 kPa	0
33	IgG	0.267	DMSO	30 kPa	0
34	IgG	0.267	DMSO	4 kPa	0
35	IgG	0.267	GSI	30 kPa	0
36	IgG	0.267	GSI	4 kPa	0
37	IgG	0.3	DMSO	30 kPa	0.167
38	IgG	0.3	DMSO	4 kPa	0
39	IgG	0.3	GSI	30 kPa	0
40	IgG	0.3	GSI	4 kPa	0
41	IgG	0.333	DMSO	30 kPa	0.167
42	IgG	0.333	DMSO	4 kPa	0
43	IgG	0.333	GSI	30 kPa	0
44	IgG	0.333	GSI	4 kPa	0
45	IgG	0.367	DMSO	30 kPa	0
46	IgG	0.367	DMSO	4 kPa	0
47	IgG	0.367	GSI	30 kPa	0
48	IgG	0.367	GSI	4 kPa	0
49	IgG	0.4	DMSO	30 kPa	0
50	IgG	0.4	DMSO	4 kPa	0
51	IgG	0.4	GSI	30 kPa	0
52	IgG	0.4	GSI	4 kPa	0
53	IgG	0.433	DMSO	30 kPa	0
54	IgG	0.433	DMSO	4 kPa	0
55	IgG	0.433	GSI	30 kPa	0
56	IgG	0.433	GSI	4 kPa	0
57	IgG	0.467	DMSO	30 kPa	0.333
58	IgG	0.467	DMSO	4 kPa	0
59	IgG	0.467	GSI	30 kPa	0
60	IgG	0.467	GSI	4 kPa	0
61	IgG	0.5	DMSO	30 kPa	0.333
62	IgG	0.5	DMSO	4 kPa	0
63	IgG	0.5	GSI	30 kPa	0.167
64	IgG	0.5	GSI	4 kPa	0
65	IgG	0.533	DMSO	30 kPa	0.167
66	IgG	0.533	DMSO	4 kPa	0
67	IgG	0.533	GSI	30 kPa	0.333
68	IgG	0.533	GSI	4 kPa	0.167
69	IgG	0.567	DMSO	30 kPa	0
70	IgG	0.567	DMSO	4 kPa	0
71	IgG	0.567	GSI	30 kPa	0.333
72	IgG	0.567	GSI	4 kPa	0
73	IgG	0.6	DMSO	30 kPa	0.333
74	IgG	0.6	DMSO	4 kPa	0
75	IgG	0.6	GSI	30 kPa	0.167
76	IgG	0.6	GSI	4 kPa	0.167
77	IgG	0.633	DMSO	30 kPa	0.833
78	IgG	0.633	DMSO	4 kPa	0
79	IgG	0.633	GSI	30 kPa	0.167
80	IgG	0.633	GSI	4 kPa	0.167
81	IgG	0.667	DMSO	30 kPa	0
82	IgG	0.667	DMSO	4 kPa	0
83	IgG	0.667	GSI	30 kPa	0.167
84	IgG	0.667	GSI	4 kPa	0
85	IgG	0.7	DMSO	30 kPa	0.833
86	IgG	0.7	DMSO	4 kPa	0
87	IgG	0.7	GSI	30 kPa	0
88	IgG	0.7	GSI	4 kPa	0.167
89	IgG	0.733	DMSO	30 kPa	1
90	IgG	0.733	DMSO	4 kPa	0.167
91	IgG	0.733	GSI	30 kPa	0.833
92	IgG	0.733	GSI	4 kPa	0.167
93	IgG	0.767	DMSO	30 kPa	1.5
94	IgG	0.767	DMSO	4 kPa	0.167
95	IgG	0.767	GSI	30 kPa	0
96	IgG	0.767	GSI	4 kPa	0.333
97	IgG	0.8	DMSO	30 kPa	5.333
98	IgG	0.8	DMSO	4 kPa	0.167
99	IgG	0.8	GSI	30 kPa	0.167
100	IgG	0.8	GSI	4 kPa	0.167
101	IgG	0.833	DMSO	30 kPa	12.833
102	IgG	0.833	DMSO	4 kPa	0.5
103	IgG	0.833	GSI	30 kPa	0.167
104	IgG	0.833	GSI	4 kPa	0.167
105	IgG	0.867	DMSO	30 kPa	32.5
106	IgG	0.867	DMSO	4 kPa	0.333
107	IgG	0.867	GSI	30 kPa	0.333
108	IgG	0.867	GSI	4 kPa	0
109	IgG	0.9	DMSO	30 kPa	54.833
110	IgG	0.9	DMSO	4 kPa	1.167
111	IgG	0.9	GSI	30 kPa	0.167
112	IgG	0.9	GSI	4 kPa	0
113	IgG	0.933	DMSO	30 kPa	67.167
114	IgG	0.933	DMSO	4 kPa	0.333
115	IgG	0.933	GSI	30 kPa	0.333
116	IgG	0.933	GSI	4 kPa	0
117	IgG	0.967	DMSO	30 kPa	44.333
118	IgG	0.967	DMSO	4 kPa	0.167
119	IgG	0.967	GSI	30 kPa	0.333
120	IgG	0.967	GSI	4 kPa	0.167
121	IgG	1	DMSO	30 kPa	14
122	IgG	1	DMSO	4 kPa	0.333
123	IgG	1	GSI	30 kPa	0.167
124	IgG	1	GSI	4 kPa	0
206	DLL1	0	DMSO	30 kPa	0
207	DLL1	0	DMSO	4 kPa	0
208	DLL1	0	GSI	30 kPa	0
209	DLL1	0	GSI	4 kPa	0
210	DLL1	0.033	DMSO	30 kPa	0
211	DLL1	0.033	DMSO	4 kPa	0
212	DLL1	0.033	GSI	30 kPa	0
213	DLL1	0.033	GSI	4 kPa	0
214	DLL1	0.067	DMSO	30 kPa	0
215	DLL1	0.067	DMSO	4 kPa	0
216	DLL1	0.067	GSI	30 kPa	0
217	DLL1	0.067	GSI	4 kPa	0.167
218	DLL1	0.1	DMSO	30 kPa	0
219	DLL1	0.1	DMSO	4 kPa	0
220	DLL1	0.1	GSI	30 kPa	0
221	DLL1	0.1	GSI	4 kPa	0
222	DLL1	0.133	DMSO	30 kPa	0.167
223	DLL1	0.133	DMSO	4 kPa	0.167
224	DLL1	0.133	GSI	30 kPa	0
225	DLL1	0.133	GSI	4 kPa	0.167
226	DLL1	0.167	DMSO	30 kPa	0
227	DLL1	0.167	DMSO	4 kPa	0.167
228	DLL1	0.167	GSI	30 kPa	0
229	DLL1	0.167	GSI	4 kPa	0.333
230	DLL1	0.2	DMSO	30 kPa	0
231	DLL1	0.2	DMSO	4 kPa	0.667
232	DLL1	0.2	GSI	30 kPa	0
233	DLL1	0.2	GSI	4 kPa	0.167
234	DLL1	0.233	DMSO	30 kPa	0
235	DLL1	0.233	DMSO	4 kPa	0
236	DLL1	0.233	GSI	30 kPa	0
237	DLL1	0.233	GSI	4 kPa	0
238	DLL1	0.267	DMSO	30 kPa	0
239	DLL1	0.267	DMSO	4 kPa	0.5
240	DLL1	0.267	GSI	30 kPa	0
241	DLL1	0.267	GSI	4 kPa	0.5
242	DLL1	0.3	DMSO	30 kPa	0.333
243	DLL1	0.3	DMSO	4 kPa	0.667
244	DLL1	0.3	GSI	30 kPa	0
245	DLL1	0.3	GSI	4 kPa	0.167
246	DLL1	0.333	DMSO	30 kPa	0.167
247	DLL1	0.333	DMSO	4 kPa	0.5
248	DLL1	0.333	GSI	30 kPa	0
249	DLL1	0.333	GSI	4 kPa	0
250	DLL1	0.367	DMSO	30 kPa	0.333
251	DLL1	0.367	DMSO	4 kPa	0.167
252	DLL1	0.367	GSI	30 kPa	0
253	DLL1	0.367	GSI	4 kPa	0.333
254	DLL1	0.4	DMSO	30 kPa	0.833
255	DLL1	0.4	DMSO	4 kPa	0.5
256	DLL1	0.4	GSI	30 kPa	0
257	DLL1	0.4	GSI	4 kPa	0.167
258	DLL1	0.433	DMSO	30 kPa	0.833
259	DLL1	0.433	DMSO	4 kPa	0.167
260	DLL1	0.433	GSI	30 kPa	0
261	DLL1	0.433	GSI	4 kPa	0.333
262	DLL1	0.467	DMSO	30 kPa	0.333
263	DLL1	0.467	DMSO	4 kPa	0.5
264	DLL1	0.467	GSI	30 kPa	0
265	DLL1	0.467	GSI	4 kPa	0.5
266	DLL1	0.5	DMSO	30 kPa	0
267	DLL1	0.5	DMSO	4 kPa	0.167
268	DLL1	0.5	GSI	30 kPa	0
269	DLL1	0.5	GSI	4 kPa	0.167
270	DLL1	0.533	DMSO	30 kPa	0.5
271	DLL1	0.533	DMSO	4 kPa	0.5
272	DLL1	0.533	GSI	30 kPa	0
273	DLL1	0.533	GSI	4 kPa	0.167
274	DLL1	0.567	DMSO	30 kPa	0.5
275	DLL1	0.567	DMSO	4 kPa	0.667
276	DLL1	0.567	GSI	30 kPa	0
277	DLL1	0.567	GSI	4 kPa	0
278	DLL1	0.6	DMSO	30 kPa	0.667
279	DLL1	0.6	DMSO	4 kPa	0.167
280	DLL1	0.6	GSI	30 kPa	0
281	DLL1	0.6	GSI	4 kPa	0.333
282	DLL1	0.633	DMSO	30 kPa	0.833
283	DLL1	0.633	DMSO	4 kPa	0
284	DLL1	0.633	GSI	30 kPa	0
285	DLL1	0.633	GSI	4 kPa	0.167
286	DLL1	0.667	DMSO	30 kPa	0.5
287	DLL1	0.667	DMSO	4 kPa	0.5
288	DLL1	0.667	GSI	30 kPa	0
289	DLL1	0.667	GSI	4 kPa	0.167
290	DLL1	0.7	DMSO	30 kPa	1
291	DLL1	0.7	DMSO	4 kPa	0.833
292	DLL1	0.7	GSI	30 kPa	0
293	DLL1	0.7	GSI	4 kPa	0.167
294	DLL1	0.733	DMSO	30 kPa	2.833
295	DLL1	0.733	DMSO	4 kPa	1.167
296	DLL1	0.733	GSI	30 kPa	0
297	DLL1	0.733	GSI	4 kPa	0
298	DLL1	0.767	DMSO	30 kPa	6
299	DLL1	0.767	DMSO	4 kPa	2.833
300	DLL1	0.767	GSI	30 kPa	0
301	DLL1	0.767	GSI	4 kPa	0.333
302	DLL1	0.8	DMSO	30 kPa	9.667
303	DLL1	0.8	DMSO	4 kPa	5
304	DLL1	0.8	GSI	30 kPa	0
305	DLL1	0.8	GSI	4 kPa	0.167
306	DLL1	0.833	DMSO	30 kPa	13.667
307	DLL1	0.833	DMSO	4 kPa	7.5
308	DLL1	0.833	GSI	30 kPa	0
309	DLL1	0.833	GSI	4 kPa	0.667
310	DLL1	0.867	DMSO	30 kPa	27.667
311	DLL1	0.867	DMSO	4 kPa	10.5
312	DLL1	0.867	GSI	30 kPa	0
313	DLL1	0.867	GSI	4 kPa	0.167
314	DLL1	0.9	DMSO	30 kPa	40.5
315	DLL1	0.9	DMSO	4 kPa	13.833
316	DLL1	0.9	GSI	30 kPa	0
317	DLL1	0.9	GSI	4 kPa	0
318	DLL1	0.933	DMSO	30 kPa	48
319	DLL1	0.933	DMSO	4 kPa	14.667
320	DLL1	0.933	GSI	30 kPa	0
321	DLL1	0.933	GSI	4 kPa	0.333
322	DLL1	0.967	DMSO	30 kPa	33.667
323	DLL1	0.967	DMSO	4 kPa	8.333
324	DLL1	0.967	GSI	30 kPa	0
325	DLL1	0.967	GSI	4 kPa	0
326	DLL1	1	DMSO	30 kPa	15.333
327	DLL1	1	DMSO	4 kPa	4.667
328	DLL1	1	GSI	30 kPa	0
329	DLL1	1	GSI	4 kPa	0
455	DLL4	0	DMSO	30 kPa	0
456	DLL4	0	DMSO	4 kPa	0
457	DLL4	0	GSI	30 kPa	0
458	DLL4	0	GSI	4 kPa	0
459	DLL4	0.033	DMSO	30 kPa	0.167
460	DLL4	0.033	DMSO	4 kPa	0
461	DLL4	0.033	GSI	30 kPa	0
462	DLL4	0.033	GSI	4 kPa	0
463	DLL4	0.067	DMSO	30 kPa	0.167
464	DLL4	0.067	DMSO	4 kPa	0
465	DLL4	0.067	GSI	30 kPa	0
466	DLL4	0.067	GSI	4 kPa	0
467	DLL4	0.1	DMSO	30 kPa	0
468	DLL4	0.1	DMSO	4 kPa	0.167
469	DLL4	0.1	GSI	30 kPa	0
470	DLL4	0.1	GSI	4 kPa	0
471	DLL4	0.133	DMSO	30 kPa	0.167
472	DLL4	0.133	DMSO	4 kPa	0
473	DLL4	0.133	GSI	30 kPa	0.167
474	DLL4	0.133	GSI	4 kPa	0
475	DLL4	0.167	DMSO	30 kPa	0
476	DLL4	0.167	DMSO	4 kPa	0.667
477	DLL4	0.167	GSI	30 kPa	0
478	DLL4	0.167	GSI	4 kPa	0
479	DLL4	0.2	DMSO	30 kPa	0
480	DLL4	0.2	DMSO	4 kPa	0.5
481	DLL4	0.2	GSI	30 kPa	0
482	DLL4	0.2	GSI	4 kPa	0
483	DLL4	0.233	DMSO	30 kPa	0.333
484	DLL4	0.233	DMSO	4 kPa	0.333
485	DLL4	0.233	GSI	30 kPa	0
486	DLL4	0.233	GSI	4 kPa	0.167
487	DLL4	0.267	DMSO	30 kPa	0.667
488	DLL4	0.267	DMSO	4 kPa	0.333
489	DLL4	0.267	GSI	30 kPa	0
490	DLL4	0.267	GSI	4 kPa	0
491	DLL4	0.3	DMSO	30 kPa	0.833
492	DLL4	0.3	DMSO	4 kPa	1
493	DLL4	0.3	GSI	30 kPa	0.167
494	DLL4	0.3	GSI	4 kPa	0
495	DLL4	0.333	DMSO	30 kPa	0.667
496	DLL4	0.333	DMSO	4 kPa	0.333
497	DLL4	0.333	GSI	30 kPa	0.167
498	DLL4	0.333	GSI	4 kPa	0
499	DLL4	0.367	DMSO	30 kPa	0.667
500	DLL4	0.367	DMSO	4 kPa	0.667
501	DLL4	0.367	GSI	30 kPa	0.5
502	DLL4	0.367	GSI	4 kPa	0
503	DLL4	0.4	DMSO	30 kPa	0.833
504	DLL4	0.4	DMSO	4 kPa	0.333
505	DLL4	0.4	GSI	30 kPa	0.5
506	DLL4	0.4	GSI	4 kPa	0.167
507	DLL4	0.433	DMSO	30 kPa	1.333
508	DLL4	0.433	DMSO	4 kPa	0.5
509	DLL4	0.433	GSI	30 kPa	0.5
510	DLL4	0.433	GSI	4 kPa	0.333
511	DLL4	0.467	DMSO	30 kPa	1.167
512	DLL4	0.467	DMSO	4 kPa	0.333
513	DLL4	0.467	GSI	30 kPa	0.333
514	DLL4	0.467	GSI	4 kPa	1.333
515	DLL4	0.5	DMSO	30 kPa	4
516	DLL4	0.5	DMSO	4 kPa	0.667
517	DLL4	0.5	GSI	30 kPa	0.167
518	DLL4	0.5	GSI	4 kPa	1.333
519	DLL4	0.533	DMSO	30 kPa	2.333
520	DLL4	0.533	DMSO	4 kPa	0.667
521	DLL4	0.533	GSI	30 kPa	0.167
522	DLL4	0.533	GSI	4 kPa	2.333
523	DLL4	0.567	DMSO	30 kPa	5
524	DLL4	0.567	DMSO	4 kPa	2.167
525	DLL4	0.567	GSI	30 kPa	0.667
526	DLL4	0.567	GSI	4 kPa	1.833
527	DLL4	0.6	DMSO	30 kPa	5
528	DLL4	0.6	DMSO	4 kPa	1.667
529	DLL4	0.6	GSI	30 kPa	1
530	DLL4	0.6	GSI	4 kPa	1.833
531	DLL4	0.633	DMSO	30 kPa	6.333
532	DLL4	0.633	DMSO	4 kPa	1
533	DLL4	0.633	GSI	30 kPa	0.5
534	DLL4	0.633	GSI	4 kPa	3.167
535	DLL4	0.667	DMSO	30 kPa	9.833
536	DLL4	0.667	DMSO	4 kPa	3.667
537	DLL4	0.667	GSI	30 kPa	1.333
538	DLL4	0.667	GSI	4 kPa	2.667
539	DLL4	0.7	DMSO	30 kPa	11.5
540	DLL4	0.7	DMSO	4 kPa	3.5
541	DLL4	0.7	GSI	30 kPa	1.167
542	DLL4	0.7	GSI	4 kPa	2.333
543	DLL4	0.733	DMSO	30 kPa	13.5
544	DLL4	0.733	DMSO	4 kPa	4.833
545	DLL4	0.733	GSI	30 kPa	0.833
546	DLL4	0.733	GSI	4 kPa	3.333
547	DLL4	0.767	DMSO	30 kPa	18.167
548	DLL4	0.767	DMSO	4 kPa	6.667
549	DLL4	0.767	GSI	30 kPa	2.5
550	DLL4	0.767	GSI	4 kPa	2.5
551	DLL4	0.8	DMSO	30 kPa	25.167
552	DLL4	0.8	DMSO	4 kPa	8.167
553	DLL4	0.8	GSI	30 kPa	1.833
554	DLL4	0.8	GSI	4 kPa	2
555	DLL4	0.833	DMSO	30 kPa	30.167
556	DLL4	0.833	DMSO	4 kPa	9.667
557	DLL4	0.833	GSI	30 kPa	2
558	DLL4	0.833	GSI	4 kPa	2.833
559	DLL4	0.867	DMSO	30 kPa	44.667
560	DLL4	0.867	DMSO	4 kPa	14.833
561	DLL4	0.867	GSI	30 kPa	3.167
562	DLL4	0.867	GSI	4 kPa	3.5
563	DLL4	0.9	DMSO	30 kPa	60.333
564	DLL4	0.9	DMSO	4 kPa	13.667
565	DLL4	0.9	GSI	30 kPa	1.333
566	DLL4	0.9	GSI	4 kPa	3.667
567	DLL4	0.933	DMSO	30 kPa	79.167
568	DLL4	0.933	DMSO	4 kPa	13.167
569	DLL4	0.933	GSI	30 kPa	2.167
570	DLL4	0.933	GSI	4 kPa	1.833
571	DLL4	0.967	DMSO	30 kPa	68.833
572	DLL4	0.967	DMSO	4 kPa	7.833
573	DLL4	0.967	GSI	30 kPa	1.167
574	DLL4	0.967	GSI	4 kPa	0.833
575	DLL4	1	DMSO	30 kPa	31.333
576	DLL4	1	DMSO	4 kPa	4.5
577	DLL4	1	GSI	30 kPa	0.667
578	DLL4	1	GSI	4 kPa	0.333
682	JAG1	0	DMSO	30 kPa	0
683	JAG1	0	DMSO	4 kPa	0
684	JAG1	0	GSI	30 kPa	0
685	JAG1	0	GSI	4 kPa	0
686	JAG1	0.033	DMSO	30 kPa	0.167
687	JAG1	0.033	DMSO	4 kPa	0
688	JAG1	0.033	GSI	30 kPa	0
689	JAG1	0.033	GSI	4 kPa	0
690	JAG1	0.067	DMSO	30 kPa	0
691	JAG1	0.067	DMSO	4 kPa	0
692	JAG1	0.067	GSI	30 kPa	0
693	JAG1	0.067	GSI	4 kPa	0
694	JAG1	0.1	DMSO	30 kPa	0.667
695	JAG1	0.1	DMSO	4 kPa	0
696	JAG1	0.1	GSI	30 kPa	0
697	JAG1	0.1	GSI	4 kPa	0
698	JAG1	0.133	DMSO	30 kPa	1.833
699	JAG1	0.133	DMSO	4 kPa	0.333
700	JAG1	0.133	GSI	30 kPa	0
701	JAG1	0.133	GSI	4 kPa	0
702	JAG1	0.167	DMSO	30 kPa	0.167
703	JAG1	0.167	DMSO	4 kPa	1
704	JAG1	0.167	GSI	30 kPa	0
705	JAG1	0.167	GSI	4 kPa	0
706	JAG1	0.2	DMSO	30 kPa	0.667
707	JAG1	0.2	DMSO	4 kPa	0.667
708	JAG1	0.2	GSI	30 kPa	0
709	JAG1	0.2	GSI	4 kPa	0
710	JAG1	0.233	DMSO	30 kPa	1.833
711	JAG1	0.233	DMSO	4 kPa	0
712	JAG1	0.233	GSI	30 kPa	0
713	JAG1	0.233	GSI	4 kPa	0
714	JAG1	0.267	DMSO	30 kPa	1.833
715	JAG1	0.267	DMSO	4 kPa	0.667
716	JAG1	0.267	GSI	30 kPa	0
717	JAG1	0.267	GSI	4 kPa	0
718	JAG1	0.3	DMSO	30 kPa	1.333
719	JAG1	0.3	DMSO	4 kPa	0.5
720	JAG1	0.3	GSI	30 kPa	0.167
721	JAG1	0.3	GSI	4 kPa	0
722	JAG1	0.333	DMSO	30 kPa	0.833
723	JAG1	0.333	DMSO	4 kPa	0.167
724	JAG1	0.333	GSI	30 kPa	0.333
725	JAG1	0.333	GSI	4 kPa	0
726	JAG1	0.367	DMSO	30 kPa	3.167
727	JAG1	0.367	DMSO	4 kPa	0.333
728	JAG1	0.367	GSI	30 kPa	0
729	JAG1	0.367	GSI	4 kPa	0
730	JAG1	0.4	DMSO	30 kPa	4
731	JAG1	0.4	DMSO	4 kPa	0.833
732	JAG1	0.4	GSI	30 kPa	0
733	JAG1	0.4	GSI	4 kPa	0
734	JAG1	0.433	DMSO	30 kPa	6.333
735	JAG1	0.433	DMSO	4 kPa	0.833
736	JAG1	0.433	GSI	30 kPa	0.167
737	JAG1	0.433	GSI	4 kPa	0
738	JAG1	0.467	DMSO	30 kPa	5
739	JAG1	0.467	DMSO	4 kPa	0.833
740	JAG1	0.467	GSI	30 kPa	0
741	JAG1	0.467	GSI	4 kPa	0
742	JAG1	0.5	DMSO	30 kPa	7.333
743	JAG1	0.5	DMSO	4 kPa	0.667
744	JAG1	0.5	GSI	30 kPa	0
745	JAG1	0.5	GSI	4 kPa	0
746	JAG1	0.533	DMSO	30 kPa	7.167
747	JAG1	0.533	DMSO	4 kPa	1.167
748	JAG1	0.533	GSI	30 kPa	0
749	JAG1	0.533	GSI	4 kPa	0
750	JAG1	0.567	DMSO	30 kPa	8.167
751	JAG1	0.567	DMSO	4 kPa	1.667
752	JAG1	0.567	GSI	30 kPa	0
753	JAG1	0.567	GSI	4 kPa	0
754	JAG1	0.6	DMSO	30 kPa	8.667
755	JAG1	0.6	DMSO	4 kPa	4.167
756	JAG1	0.6	GSI	30 kPa	0.167
757	JAG1	0.6	GSI	4 kPa	0
758	JAG1	0.633	DMSO	30 kPa	10.833
759	JAG1	0.633	DMSO	4 kPa	2.833
760	JAG1	0.633	GSI	30 kPa	0.167
761	JAG1	0.633	GSI	4 kPa	0
762	JAG1	0.667	DMSO	30 kPa	13.667
763	JAG1	0.667	DMSO	4 kPa	3.167
764	JAG1	0.667	GSI	30 kPa	0.333
765	JAG1	0.667	GSI	4 kPa	0
766	JAG1	0.7	DMSO	30 kPa	14.333
767	JAG1	0.7	DMSO	4 kPa	6
768	JAG1	0.7	GSI	30 kPa	0.5
769	JAG1	0.7	GSI	4 kPa	0
770	JAG1	0.733	DMSO	30 kPa	11.5
771	JAG1	0.733	DMSO	4 kPa	8.5
772	JAG1	0.733	GSI	30 kPa	0
773	JAG1	0.733	GSI	4 kPa	0
774	JAG1	0.767	DMSO	30 kPa	14
775	JAG1	0.767	DMSO	4 kPa	9.5
776	JAG1	0.767	GSI	30 kPa	0
777	JAG1	0.767	GSI	4 kPa	0
778	JAG1	0.8	DMSO	30 kPa	15.5
779	JAG1	0.8	DMSO	4 kPa	8.833
780	JAG1	0.8	GSI	30 kPa	0
781	JAG1	0.8	GSI	4 kPa	0
782	JAG1	0.833	DMSO	30 kPa	20.167
783	JAG1	0.833	DMSO	4 kPa	11
784	JAG1	0.833	GSI	30 kPa	0
785	JAG1	0.833	GSI	4 kPa	0
786	JAG1	0.867	DMSO	30 kPa	25.833
787	JAG1	0.867	DMSO	4 kPa	12.5
788	JAG1	0.867	GSI	30 kPa	0.333
789	JAG1	0.867	GSI	4 kPa	0
790	JAG1	0.9	DMSO	30 kPa	34.833
791	JAG1	0.9	DMSO	4 kPa	11.667
792	JAG1	0.9	GSI	30 kPa	0.5
793	JAG1	0.9	GSI	4 kPa	0
794	JAG1	0.933	DMSO	30 kPa	49.333
795	JAG1	0.933	DMSO	4 kPa	8.833
796	JAG1	0.933	GSI	30 kPa	0.167
797	JAG1	0.933	GSI	4 kPa	0
798	JAG1	0.967	DMSO	30 kPa	39.833
799	JAG1	0.967	DMSO	4 kPa	7.667
800	JAG1	0.967	GSI	30 kPa	0.167
801	JAG1	0.967	GSI	4 kPa	0
802	JAG1	1	DMSO	30 kPa	20.167
803	JAG1	1	DMSO	4 kPa	5.333
804	JAG1	1	GSI	30 kPa	0.167
805	JAG1	1	GSI	4 kPa	0.167
