# Supplementary material for: Spatial patterning of liver progenitor cell differentiation mediated by cellular contractility and Notch signaling
Source: eLife journal article supplement (doi:10.7554/elife.38536), 2018-12-27
Supplement: supp [file elife-38536-supp-v1.zip › elife_poa_e38536_Figure_2_source_data_2.csv]

	Radius (dimensionless)	Substrate stiffness	SOX9 intensity (a.u.)	HNF4A intensity (a.u.)
1	0	30 kPa	1.288	0.979
2	0	4 kPa	1.046	1.687
3	0.033	30 kPa	1.399	1.021
4	0.033	4 kPa	0.954	1.653
5	0.067	30 kPa	1.376	1.007
6	0.067	4 kPa	0.908	1.714
7	0.1	30 kPa	1.469	1.047
8	0.1	4 kPa	0.905	1.654
9	0.133	30 kPa	1.451	1.043
10	0.133	4 kPa	0.94	1.703
11	0.167	30 kPa	1.392	1.049
12	0.167	4 kPa	0.923	1.774
13	0.2	30 kPa	1.452	1.054
14	0.2	4 kPa	0.925	1.827
15	0.233	30 kPa	1.415	1.041
16	0.233	4 kPa	0.935	1.754
17	0.267	30 kPa	1.406	1.043
18	0.267	4 kPa	0.932	1.72
19	0.3	30 kPa	1.433	1.052
20	0.3	4 kPa	0.936	1.7
21	0.333	30 kPa	1.405	1.053
22	0.333	4 kPa	0.933	1.696
23	0.367	30 kPa	1.427	1.047
24	0.367	4 kPa	0.939	1.659
25	0.4	30 kPa	1.387	1.047
26	0.4	4 kPa	0.941	1.659
27	0.433	30 kPa	1.413	1.048
28	0.433	4 kPa	0.923	1.622
29	0.467	30 kPa	1.376	1.049
30	0.467	4 kPa	0.963	1.667
31	0.5	30 kPa	1.389	1.045
32	0.5	4 kPa	0.966	1.634
33	0.533	30 kPa	1.41	1.062
34	0.533	4 kPa	0.957	1.573
35	0.567	30 kPa	1.428	1.063
36	0.567	4 kPa	0.971	1.563
37	0.6	30 kPa	1.455	1.078
38	0.6	4 kPa	0.978	1.551
39	0.633	30 kPa	1.502	1.085
40	0.633	4 kPa	0.993	1.556
41	0.667	30 kPa	1.513	1.101
42	0.667	4 kPa	1.007	1.568
43	0.7	30 kPa	1.54	1.124
44	0.7	4 kPa	0.994	1.651
45	0.733	30 kPa	1.607	1.156
46	0.733	4 kPa	0.991	1.631
47	0.767	30 kPa	1.688	1.187
48	0.767	4 kPa	1.007	1.722
49	0.8	30 kPa	1.786	1.229
50	0.8	4 kPa	0.992	1.742
51	0.833	30 kPa	1.932	1.252
52	0.833	4 kPa	1.012	1.777
53	0.867	30 kPa	2.062	1.291
54	0.867	4 kPa	1.029	1.75
55	0.9	30 kPa	2.242	1.287
56	0.9	4 kPa	1.029	1.615
57	0.933	30 kPa	2.399	1.254
58	0.933	4 kPa	1.048	1.466
59	0.967	30 kPa	2.354	1.194
60	0.967	4 kPa	1.024	1.317
61	1	30 kPa	2.084	1.122
62	1	4 kPa	1.034	1.217
