# Supplementary material for: Spatial patterning of liver progenitor cell differentiation mediated by cellular contractility and Notch signaling
Source: eLife journal article supplement (doi:10.7554/elife.38536), 2018-12-27
Supplement: supp [file elife-38536-supp-v1.zip › elife_poa_e38536_Figure_3_source_data_1.csv]

	Radius (dimensionless)	OPN+ cell probability density	Condition	Treatment
1	0	0	IgG	DMSO
2	0.034	0.002	IgG	DMSO
3	0.069	0.002	IgG	DMSO
4	0.103	0.002	IgG	DMSO
5	0.138	0.003	IgG	DMSO
6	0.172	0.009	IgG	DMSO
7	0.207	0.002	IgG	DMSO
8	0.241	0.008	IgG	DMSO
9	0.276	0.005	IgG	DMSO
10	0.31	0.015	IgG	DMSO
11	0.345	0.025	IgG	DMSO
12	0.379	0.011	IgG	DMSO
13	0.414	0.011	IgG	DMSO
14	0.448	0.018	IgG	DMSO
15	0.483	0.025	IgG	DMSO
16	0.517	0.058	IgG	DMSO
17	0.552	0.057	IgG	DMSO
18	0.586	0.085	IgG	DMSO
19	0.621	0.092	IgG	DMSO
20	0.655	0.138	IgG	DMSO
21	0.69	0.157	IgG	DMSO
22	0.724	0.218	IgG	DMSO
23	0.759	0.314	IgG	DMSO
24	0.793	0.449	IgG	DMSO
25	0.828	0.626	IgG	DMSO
26	0.862	0.811	IgG	DMSO
27	0.897	0.965	IgG	DMSO
28	0.931	1	IgG	DMSO
29	0.966	0.845	IgG	DMSO
30	1	0.297	IgG	DMSO
31	0	0	IgG	TGF
32	0.034	0	IgG	TGF
33	0.069	0.184	IgG	TGF
34	0.103	0.184	IgG	TGF
35	0.138	0.061	IgG	TGF
36	0.172	0.388	IgG	TGF
37	0.207	0.224	IgG	TGF
38	0.241	0.306	IgG	TGF
39	0.276	0.449	IgG	TGF
40	0.31	0.286	IgG	TGF
41	0.345	0.633	IgG	TGF
42	0.379	0.571	IgG	TGF
43	0.414	0.612	IgG	TGF
44	0.448	0.918	IgG	TGF
45	0.483	0.571	IgG	TGF
46	0.517	0.551	IgG	TGF
47	0.552	0.776	IgG	TGF
48	0.586	0.755	IgG	TGF
49	0.621	1	IgG	TGF
50	0.655	0.816	IgG	TGF
51	0.69	0.878	IgG	TGF
52	0.724	0.878	IgG	TGF
53	0.759	0.51	IgG	TGF
54	0.793	0.837	IgG	TGF
55	0.828	0.857	IgG	TGF
56	0.862	0.694	IgG	TGF
57	0.897	0.531	IgG	TGF
58	0.931	0.857	IgG	TGF
59	0.966	0.469	IgG	TGF
60	1	0.184	IgG	TGF
61	0	0	IgG	DECMA
62	0.034	0	IgG	DECMA
63	0.069	0.043	IgG	DECMA
64	0.103	0.043	IgG	DECMA
65	0.138	0	IgG	DECMA
66	0.172	0	IgG	DECMA
67	0.207	0.087	IgG	DECMA
68	0.241	0	IgG	DECMA
69	0.276	0	IgG	DECMA
70	0.31	0.087	IgG	DECMA
71	0.345	0.087	IgG	DECMA
72	0.379	0.043	IgG	DECMA
73	0.414	0.087	IgG	DECMA
74	0.448	0.261	IgG	DECMA
75	0.483	0.174	IgG	DECMA
76	0.517	0.13	IgG	DECMA
77	0.552	0.13	IgG	DECMA
78	0.586	0.174	IgG	DECMA
79	0.621	0.087	IgG	DECMA
80	0.655	0.174	IgG	DECMA
81	0.69	0.217	IgG	DECMA
82	0.724	0.087	IgG	DECMA
83	0.759	0.217	IgG	DECMA
84	0.793	0.304	IgG	DECMA
85	0.828	0.435	IgG	DECMA
86	0.862	1	IgG	DECMA
87	0.897	0.87	IgG	DECMA
88	0.931	0.87	IgG	DECMA
89	0.966	0.565	IgG	DECMA
90	1	0.13	IgG	DECMA
91	0	0.003	DLL4	DMSO
92	0.034	0.005	DLL4	DMSO
93	0.069	0.008	DLL4	DMSO
94	0.103	0.01	DLL4	DMSO
95	0.138	0.01	DLL4	DMSO
96	0.172	0.008	DLL4	DMSO
97	0.207	0.024	DLL4	DMSO
98	0.241	0.015	DLL4	DMSO
99	0.276	0.027	DLL4	DMSO
100	0.31	0.033	DLL4	DMSO
101	0.345	0.04	DLL4	DMSO
102	0.379	0.044	DLL4	DMSO
103	0.414	0.054	DLL4	DMSO
104	0.448	0.063	DLL4	DMSO
105	0.483	0.066	DLL4	DMSO
106	0.517	0.077	DLL4	DMSO
107	0.552	0.089	DLL4	DMSO
108	0.586	0.117	DLL4	DMSO
109	0.621	0.134	DLL4	DMSO
110	0.655	0.143	DLL4	DMSO
111	0.69	0.216	DLL4	DMSO
112	0.724	0.23	DLL4	DMSO
113	0.759	0.323	DLL4	DMSO
114	0.793	0.397	DLL4	DMSO
115	0.828	0.458	DLL4	DMSO
116	0.862	0.611	DLL4	DMSO
117	0.897	0.834	DLL4	DMSO
118	0.931	1	DLL4	DMSO
119	0.966	0.976	DLL4	DMSO
120	1	0.402	DLL4	DMSO
121	0	0	DLL4	TGF
122	0.034	0.033	DLL4	TGF
123	0.069	0.067	DLL4	TGF
124	0.103	0.067	DLL4	TGF
125	0.138	0.033	DLL4	TGF
126	0.172	0.167	DLL4	TGF
127	0.207	0.2	DLL4	TGF
128	0.241	0.2	DLL4	TGF
129	0.276	0.133	DLL4	TGF
130	0.31	0.433	DLL4	TGF
131	0.345	0.433	DLL4	TGF
132	0.379	0.267	DLL4	TGF
133	0.414	0.333	DLL4	TGF
134	0.448	0.7	DLL4	TGF
135	0.483	0.567	DLL4	TGF
136	0.517	0.7	DLL4	TGF
137	0.552	0.667	DLL4	TGF
138	0.586	0.7	DLL4	TGF
139	0.621	0.767	DLL4	TGF
140	0.655	0.833	DLL4	TGF
141	0.69	0.767	DLL4	TGF
142	0.724	1	DLL4	TGF
143	0.759	0.6	DLL4	TGF
144	0.793	1	DLL4	TGF
145	0.828	0.867	DLL4	TGF
146	0.862	0.767	DLL4	TGF
147	0.897	0.433	DLL4	TGF
148	0.931	0.6	DLL4	TGF
149	0.966	0.4	DLL4	TGF
150	1	0.333	DLL4	TGF
151	0	0	DLL4	DECMA
152	0.034	0.108	DLL4	DECMA
153	0.069	0.12	DLL4	DECMA
154	0.103	0.157	DLL4	DECMA
155	0.138	0.193	DLL4	DECMA
156	0.172	0.337	DLL4	DECMA
157	0.207	0.289	DLL4	DECMA
158	0.241	0.373	DLL4	DECMA
159	0.276	0.494	DLL4	DECMA
160	0.31	0.542	DLL4	DECMA
161	0.345	0.41	DLL4	DECMA
162	0.379	0.482	DLL4	DECMA
163	0.414	0.759	DLL4	DECMA
164	0.448	0.639	DLL4	DECMA
165	0.483	0.711	DLL4	DECMA
166	0.517	0.663	DLL4	DECMA
167	0.552	0.819	DLL4	DECMA
168	0.586	0.904	DLL4	DECMA
169	0.621	0.976	DLL4	DECMA
170	0.655	0.916	DLL4	DECMA
171	0.69	0.795	DLL4	DECMA
172	0.724	0.892	DLL4	DECMA
173	0.759	0.843	DLL4	DECMA
174	0.793	1	DLL4	DECMA
175	0.828	0.783	DLL4	DECMA
176	0.862	0.699	DLL4	DECMA
177	0.897	0.53	DLL4	DECMA
178	0.931	0.506	DLL4	DECMA
179	0.966	0.47	DLL4	DECMA
180	1	0.205	DLL4	DECMA
