# Supplementary material for: Spatial patterning of liver progenitor cell differentiation mediated by cellular contractility and Notch signaling
Source: eLife journal article supplement (doi:10.7554/elife.38536), 2018-12-27
Supplement: supp [file elife-38536-supp-v1.zip › elife_poa_e38536_Figure_6_source_data_1.csv]

	Radius (dimensionless)	Treatment	Substrate stiffness	% OPN positive
548	0	DMSO	30 kPa	0
549	0	DMSO	4 kPa	0
550	0	FR180204	30 kPa	0
551	0	Blebbistatin	30 kPa	0
552	0	Y-27632	30 kPa	0
553	0.033	DMSO	30 kPa	0
554	0.033	DMSO	4 kPa	0
555	0.033	FR180204	30 kPa	0
556	0.033	Blebbistatin	30 kPa	0
557	0.033	Y-27632	30 kPa	10
558	0.067	DMSO	30 kPa	0
559	0.067	DMSO	4 kPa	0
560	0.067	FR180204	30 kPa	0
561	0.067	Blebbistatin	30 kPa	0
562	0.067	Y-27632	30 kPa	4.545
563	0.1	DMSO	30 kPa	0
564	0.1	DMSO	4 kPa	0
565	0.1	FR180204	30 kPa	0
566	0.1	Blebbistatin	30 kPa	0
567	0.1	Y-27632	30 kPa	9.524
568	0.133	DMSO	30 kPa	0
569	0.133	DMSO	4 kPa	0
570	0.133	FR180204	30 kPa	0
571	0.133	Blebbistatin	30 kPa	25
572	0.133	Y-27632	30 kPa	10
573	0.167	DMSO	30 kPa	0
574	0.167	DMSO	4 kPa	0
575	0.167	FR180204	30 kPa	0
576	0.167	Blebbistatin	30 kPa	0
577	0.167	Y-27632	30 kPa	12.5
578	0.2	DMSO	30 kPa	0.5
579	0.2	DMSO	4 kPa	0
580	0.2	FR180204	30 kPa	0
581	0.2	Blebbistatin	30 kPa	18.182
582	0.2	Y-27632	30 kPa	8
583	0.233	DMSO	30 kPa	0.737
584	0.233	DMSO	4 kPa	0
585	0.233	FR180204	30 kPa	0
586	0.233	Blebbistatin	30 kPa	16.667
587	0.233	Y-27632	30 kPa	19.689
588	0.267	DMSO	30 kPa	17.831
589	0.267	DMSO	4 kPa	0
590	0.267	FR180204	30 kPa	0
591	0.267	Blebbistatin	30 kPa	0
592	0.267	Y-27632	30 kPa	22.09
593	0.3	DMSO	30 kPa	1.024
594	0.3	DMSO	4 kPa	0
595	0.3	FR180204	30 kPa	0
596	0.3	Blebbistatin	30 kPa	16.667
597	0.3	Y-27632	30 kPa	22.631
598	0.333	DMSO	30 kPa	1.267
599	0.333	DMSO	4 kPa	0
600	0.333	FR180204	30 kPa	0
601	0.333	Blebbistatin	30 kPa	8.333
602	0.333	Y-27632	30 kPa	22.294
603	0.367	DMSO	30 kPa	0.214
604	0.367	DMSO	4 kPa	0
605	0.367	FR180204	30 kPa	0
606	0.367	Blebbistatin	30 kPa	17.647
607	0.367	Y-27632	30 kPa	14.286
608	0.4	DMSO	30 kPa	0.981
609	0.4	DMSO	4 kPa	0
610	0.4	FR180204	30 kPa	0
611	0.4	Blebbistatin	30 kPa	9.524
612	0.4	Y-27632	30 kPa	13.436
613	0.433	DMSO	30 kPa	0.521
614	0.433	DMSO	4 kPa	0
615	0.433	FR180204	30 kPa	0
616	0.433	Blebbistatin	30 kPa	4.167
617	0.433	Y-27632	30 kPa	21.591
618	0.467	DMSO	30 kPa	0.579
619	0.467	DMSO	4 kPa	0
620	0.467	FR180204	30 kPa	0
621	0.467	Blebbistatin	30 kPa	3.226
622	0.467	Y-27632	30 kPa	22.965
623	0.5	DMSO	30 kPa	0.693
624	0.5	DMSO	4 kPa	0
625	0.5	FR180204	30 kPa	0
626	0.5	Blebbistatin	30 kPa	14.286
627	0.5	Y-27632	30 kPa	22.121
628	0.533	DMSO	30 kPa	1.004
629	0.533	DMSO	4 kPa	0
630	0.533	FR180204	30 kPa	0
631	0.533	Blebbistatin	30 kPa	20
632	0.533	Y-27632	30 kPa	22.943
633	0.567	DMSO	30 kPa	0.889
634	0.567	DMSO	4 kPa	0
635	0.567	FR180204	30 kPa	0.412
636	0.567	Blebbistatin	30 kPa	13.043
637	0.567	Y-27632	30 kPa	21.053
638	0.6	DMSO	30 kPa	0.78
639	0.6	DMSO	4 kPa	0
640	0.6	FR180204	30 kPa	0.226
641	0.6	Blebbistatin	30 kPa	17.073
642	0.6	Y-27632	30 kPa	31.45
643	0.633	DMSO	30 kPa	1.08
644	0.633	DMSO	4 kPa	0
645	0.633	FR180204	30 kPa	0.204
646	0.633	Blebbistatin	30 kPa	13.514
647	0.633	Y-27632	30 kPa	24.465
648	0.667	DMSO	30 kPa	1.521
649	0.667	DMSO	4 kPa	0
650	0.667	FR180204	30 kPa	0
651	0.667	Blebbistatin	30 kPa	17.143
652	0.667	Y-27632	30 kPa	28.263
653	0.7	DMSO	30 kPa	2.72
654	0.7	DMSO	4 kPa	0
655	0.7	FR180204	30 kPa	0
656	0.7	Blebbistatin	30 kPa	14.894
657	0.7	Y-27632	30 kPa	13.809
658	0.733	DMSO	30 kPa	4.101
659	0.733	DMSO	4 kPa	0
660	0.733	FR180204	30 kPa	0
661	0.733	Blebbistatin	30 kPa	8.571
662	0.733	Y-27632	30 kPa	20
663	0.767	DMSO	30 kPa	5.853
664	0.767	DMSO	4 kPa	0
665	0.767	FR180204	30 kPa	0
666	0.767	Blebbistatin	30 kPa	28.125
667	0.767	Y-27632	30 kPa	20.289
668	0.8	DMSO	30 kPa	8.229
669	0.8	DMSO	4 kPa	2.469
670	0.8	FR180204	30 kPa	0.159
671	0.8	Blebbistatin	30 kPa	25
672	0.8	Y-27632	30 kPa	15.891
673	0.833	DMSO	30 kPa	13.915
674	0.833	DMSO	4 kPa	1.825
675	0.833	FR180204	30 kPa	0
676	0.833	Blebbistatin	30 kPa	13.889
677	0.833	Y-27632	30 kPa	10.792
678	0.867	DMSO	30 kPa	20.046
679	0.867	DMSO	4 kPa	4.762
680	0.867	FR180204	30 kPa	0.14
681	0.867	Blebbistatin	30 kPa	8.824
682	0.867	Y-27632	30 kPa	24.245
683	0.9	DMSO	30 kPa	27.11
684	0.9	DMSO	4 kPa	4.748
685	0.9	FR180204	30 kPa	0.386
686	0.9	Blebbistatin	30 kPa	13.043
687	0.9	Y-27632	30 kPa	21.956
688	0.933	DMSO	30 kPa	34.241
689	0.933	DMSO	4 kPa	7.419
690	0.933	FR180204	30 kPa	1.205
691	0.933	Blebbistatin	30 kPa	6.25
692	0.933	Y-27632	30 kPa	30.099
693	0.967	DMSO	30 kPa	24.648
694	0.967	DMSO	4 kPa	5.263
695	0.967	FR180204	30 kPa	2.065
696	0.967	Blebbistatin	30 kPa	0
697	0.967	Y-27632	30 kPa	24.041
698	1	DMSO	30 kPa	17.201
699	1	DMSO	4 kPa	3.268
700	1	FR180204	30 kPa	1.376
701	1	Blebbistatin	30 kPa	0
702	1	Y-27632	30 kPa	41.552
