# Supplementary material for: Spatial patterning of liver progenitor cell differentiation mediated by cellular contractility and Notch signaling
Source: eLife journal article supplement (doi:10.7554/elife.38536), 2018-12-27
Supplement: supp [file elife-38536-supp-v1.zip › elife_poa_e38536_Figure_6_source_data_1.csv]

	Radius (dimensionless)	Stress (Pa)	95% CI	Substrate stiffness	Treatment
1	0.01	33.18241366	4.24	30 kPa	DMSO
2	0.02	34.08141518	4.187	30 kPa	DMSO
3	0.03	33.90255866	3.85	30 kPa	DMSO
4	0.04	34.18751402	3.64	30 kPa	DMSO
5	0.05	34.27099626	3.469	30 kPa	DMSO
6	0.06	34.16431006	3.339	30 kPa	DMSO
7	0.07	34.04509489	3.262	30 kPa	DMSO
8	0.08	33.88072558	3.254	30 kPa	DMSO
9	0.09	33.85688228	3.269	30 kPa	DMSO
10	0.1	33.94558259	3.338	30 kPa	DMSO
11	0.11	33.87876596	3.448	30 kPa	DMSO
12	0.12	33.79727849	3.472	30 kPa	DMSO
13	0.13	33.52231738	3.501	30 kPa	DMSO
14	0.14	33.70090189	3.486	30 kPa	DMSO
15	0.15	33.86773948	3.598	30 kPa	DMSO
16	0.16	33.89166086	3.574	30 kPa	DMSO
17	0.17	34.15005678	3.619	30 kPa	DMSO
18	0.18	33.98414191	3.49	30 kPa	DMSO
19	0.19	34.30871594	3.553	30 kPa	DMSO
20	0.2	34.79752559	3.514	30 kPa	DMSO
21	0.21	34.80412422	3.37	30 kPa	DMSO
22	0.22	35.32168781	3.329	30 kPa	DMSO
23	0.23	35.28864298	3.226	30 kPa	DMSO
24	0.24	35.77014967	3.201	30 kPa	DMSO
25	0.25	35.63687814	3.055	30 kPa	DMSO
26	0.26	35.7657906	2.981	30 kPa	DMSO
27	0.27	35.59481883	2.87	30 kPa	DMSO
28	0.28	35.56998185	2.772	30 kPa	DMSO
29	0.29	35.28169637	2.717	30 kPa	DMSO
30	0.3	35.29745943	2.655	30 kPa	DMSO
31	0.31	35.33951586	2.621	30 kPa	DMSO
32	0.32	35.42827766	2.604	30 kPa	DMSO
33	0.33	35.29221626	2.598	30 kPa	DMSO
34	0.34	35.50768166	2.714	30 kPa	DMSO
35	0.35	35.70709482	2.744	30 kPa	DMSO
36	0.36	35.48562548	2.793	30 kPa	DMSO
37	0.37	35.31841644	2.737	30 kPa	DMSO
38	0.38	35.29628871	2.744	30 kPa	DMSO
39	0.39	35.64649514	2.909	30 kPa	DMSO
40	0.4	35.26674889	2.792	30 kPa	DMSO
41	0.41	35.24136096	2.792	30 kPa	DMSO
42	0.42	35.3017836	2.786	30 kPa	DMSO
43	0.43	35.46974161	2.88	30 kPa	DMSO
44	0.44	35.84825737	2.961	30 kPa	DMSO
45	0.45	35.52051794	2.853	30 kPa	DMSO
46	0.46	36.12191044	2.891	30 kPa	DMSO
47	0.47	36.43826453	2.971	30 kPa	DMSO
48	0.48	36.60769568	3.06	30 kPa	DMSO
49	0.49	36.78483271	2.958	30 kPa	DMSO
50	0.5	37.3833464	3.051	30 kPa	DMSO
51	0.51	37.80339713	3.115	30 kPa	DMSO
52	0.52	38.49064159	3.232	30 kPa	DMSO
53	0.53	38.81234441	3.271	30 kPa	DMSO
54	0.54	38.81525965	3.215	30 kPa	DMSO
55	0.55	39.16517877	3.275	30 kPa	DMSO
56	0.56	39.72790178	3.249	30 kPa	DMSO
57	0.57	40.07417068	3.255	30 kPa	DMSO
58	0.58	40.25282233	3.202	30 kPa	DMSO
59	0.59	40.44526867	3.208	30 kPa	DMSO
60	0.6	41.05698091	3.211	30 kPa	DMSO
61	0.61	41.30130644	3.237	30 kPa	DMSO
62	0.62	41.71460376	3.313	30 kPa	DMSO
63	0.63	42.07330615	3.344	30 kPa	DMSO
64	0.64	42.42400298	3.384	30 kPa	DMSO
65	0.65	42.63565257	3.449	30 kPa	DMSO
66	0.66	43.1957059	3.595	30 kPa	DMSO
67	0.67	43.51263347	3.671	30 kPa	DMSO
68	0.68	43.51985631	3.712	30 kPa	DMSO
69	0.69	43.71510514	3.782	30 kPa	DMSO
70	0.7	43.70480644	3.736	30 kPa	DMSO
71	0.71	44.02671106	3.755	30 kPa	DMSO
72	0.72	43.63131191	3.629	30 kPa	DMSO
73	0.73	43.65350569	3.523	30 kPa	DMSO
74	0.74	43.85609773	3.391	30 kPa	DMSO
75	0.75	43.93584014	3.305	30 kPa	DMSO
76	0.76	44.05738766	3.158	30 kPa	DMSO
77	0.77	44.23545457	3.058	30 kPa	DMSO
78	0.78	44.63198882	2.961	30 kPa	DMSO
79	0.79	44.74569039	2.927	30 kPa	DMSO
80	0.8	44.983351	2.834	30 kPa	DMSO
81	0.81	45.45753063	2.785	30 kPa	DMSO
82	0.82	46.24690666	2.833	30 kPa	DMSO
83	0.83	47.31552225	2.876	30 kPa	DMSO
84	0.84	48.68684688	2.937	30 kPa	DMSO
85	0.85	50.8341939	3.042	30 kPa	DMSO
86	0.86	53.29638337	3.151	30 kPa	DMSO
87	0.87	56.15597993	3.353	30 kPa	DMSO
88	0.88	60.06337189	3.519	30 kPa	DMSO
89	0.89	64.33605365	3.711	30 kPa	DMSO
90	0.9	68.9198808	4.088	30 kPa	DMSO
91	0.91	74.03866802	4.582	30 kPa	DMSO
92	0.92	80.05758838	4.865	30 kPa	DMSO
93	0.93	86.4441434	5.325	30 kPa	DMSO
94	0.94	93.9417697	5.925	30 kPa	DMSO
95	0.95	103.4584747	6.681	30 kPa	DMSO
96	0.96	112.7903462	7.46	30 kPa	DMSO
97	0.97	122.0035772	8.681	30 kPa	DMSO
98	0.98	130.3584223	9.704	30 kPa	DMSO
99	0.99	129.3215256	10.211	30 kPa	DMSO
100	1	112.1209393	8.666	30 kPa	DMSO
374	0.01	23.20058156	2.305	30 kPa	DMSO
375	0.02	23.50149617	2.162	30 kPa	DMSO
376	0.03	23.87260575	1.993	30 kPa	DMSO
377	0.04	24.57602458	1.811	30 kPa	DMSO
378	0.05	25.46705334	1.758	30 kPa	DMSO
379	0.06	26.35743719	1.773	30 kPa	DMSO
380	0.07	27.31683089	1.88	30 kPa	DMSO
381	0.08	28.08850255	2.003	30 kPa	DMSO
382	0.09	28.6370156	2.077	30 kPa	DMSO
383	0.1	29.2261506	2.202	30 kPa	DMSO
384	0.11	29.82917751	2.334	30 kPa	DMSO
385	0.12	30.38339338	2.427	30 kPa	DMSO
386	0.13	30.63749061	2.477	30 kPa	DMSO
387	0.14	31.20598091	2.534	30 kPa	DMSO
388	0.15	31.72736309	2.543	30 kPa	DMSO
389	0.16	32.27759134	2.518	30 kPa	DMSO
390	0.17	32.83823977	2.448	30 kPa	DMSO
391	0.18	33.27384672	2.394	30 kPa	DMSO
392	0.19	33.50719561	2.357	30 kPa	DMSO
393	0.2	33.76991327	2.32	30 kPa	DMSO
394	0.21	33.80007278	2.289	30 kPa	DMSO
395	0.22	33.93135253	2.327	30 kPa	DMSO
396	0.23	33.90329379	2.342	30 kPa	DMSO
397	0.24	33.58763585	2.331	30 kPa	DMSO
398	0.25	33.46185492	2.317	30 kPa	DMSO
399	0.26	33.36867173	2.307	30 kPa	DMSO
400	0.27	33.35944113	2.277	30 kPa	DMSO
401	0.28	33.02031648	2.213	30 kPa	DMSO
402	0.29	33.01858392	2.184	30 kPa	DMSO
403	0.3	32.98266278	2.124	30 kPa	DMSO
404	0.31	32.84759963	2.063	30 kPa	DMSO
405	0.32	32.81540039	1.994	30 kPa	DMSO
406	0.33	32.86532346	1.95	30 kPa	DMSO
407	0.34	32.96314216	1.913	30 kPa	DMSO
408	0.35	33.060485	1.883	30 kPa	DMSO
409	0.36	32.97244622	1.86	30 kPa	DMSO
410	0.37	32.89229415	1.843	30 kPa	DMSO
411	0.38	33.01033015	1.87	30 kPa	DMSO
412	0.39	32.84856088	1.897	30 kPa	DMSO
413	0.4	32.86358853	1.957	30 kPa	DMSO
414	0.41	32.95362361	2.025	30 kPa	DMSO
415	0.42	33.20107611	2.104	30 kPa	DMSO
416	0.43	33.23853417	2.157	30 kPa	DMSO
417	0.44	33.49480211	2.232	30 kPa	DMSO
418	0.45	33.55735507	2.303	30 kPa	DMSO
419	0.46	33.89841324	2.303	30 kPa	DMSO
420	0.47	33.76834482	2.257	30 kPa	DMSO
421	0.48	33.90510581	2.239	30 kPa	DMSO
422	0.49	33.98472365	2.202	30 kPa	DMSO
423	0.5	34.00774492	2.182	30 kPa	DMSO
424	0.51	33.90842472	2.156	30 kPa	DMSO
425	0.52	33.88291112	2.114	30 kPa	DMSO
426	0.53	34.15383266	2.133	30 kPa	DMSO
427	0.54	34.22995967	2.141	30 kPa	DMSO
428	0.55	34.48498922	2.162	30 kPa	DMSO
429	0.56	34.8134273	2.17	30 kPa	DMSO
430	0.57	35.21064674	2.226	30 kPa	DMSO
431	0.58	35.4295445	2.248	30 kPa	DMSO
432	0.59	35.7740605	2.314	30 kPa	DMSO
433	0.6	35.93883442	2.362	30 kPa	DMSO
434	0.61	36.39464436	2.465	30 kPa	DMSO
435	0.62	36.63913982	2.538	30 kPa	DMSO
436	0.63	36.75807156	2.582	30 kPa	DMSO
437	0.64	36.70635544	2.582	30 kPa	DMSO
438	0.65	36.91992317	2.628	30 kPa	DMSO
439	0.66	37.01940152	2.634	30 kPa	DMSO
440	0.67	37.11506391	2.603	30 kPa	DMSO
441	0.68	37.05285083	2.578	30 kPa	DMSO
442	0.69	37.417691	2.592	30 kPa	DMSO
443	0.7	37.23858689	2.515	30 kPa	DMSO
444	0.71	37.45998547	2.493	30 kPa	DMSO
445	0.72	37.90428774	2.551	30 kPa	DMSO
446	0.73	37.98956005	2.527	30 kPa	DMSO
447	0.74	38.06904075	2.498	30 kPa	DMSO
448	0.75	38.655133	2.574	30 kPa	DMSO
449	0.76	38.89333371	2.585	30 kPa	DMSO
450	0.77	39.2512107	2.623	30 kPa	DMSO
451	0.78	39.37592781	2.602	30 kPa	DMSO
452	0.79	39.62581132	2.613	30 kPa	DMSO
453	0.8	40.08369986	2.686	30 kPa	DMSO
454	0.81	40.31973545	2.677	30 kPa	DMSO
455	0.82	40.81297291	2.689	30 kPa	DMSO
456	0.83	41.61247432	2.668	30 kPa	DMSO
457	0.84	42.81993476	2.798	30 kPa	DMSO
458	0.85	44.7578871	2.925	30 kPa	DMSO
459	0.86	47.22691177	3.158	30 kPa	DMSO
460	0.87	50.2904505	3.338	30 kPa	DMSO
461	0.88	54.29219708	3.652	30 kPa	DMSO
462	0.89	59.63215214	4.125	30 kPa	DMSO
463	0.9	65.63867415	4.658	30 kPa	DMSO
464	0.91	72.91599817	5.517	30 kPa	DMSO
465	0.92	81.15863375	6.387	30 kPa	DMSO
466	0.93	90.0441449	7.389	30 kPa	DMSO
467	0.94	99.32195829	8.197	30 kPa	DMSO
468	0.95	107.6755171	8.61	30 kPa	DMSO
469	0.96	111.830359	8.517	30 kPa	DMSO
470	0.97	113.1583489	8.845	30 kPa	DMSO
471	0.98	115.8528039	9.555	30 kPa	DMSO
472	0.99	113.269216	10.255	30 kPa	DMSO
473	1	97.88465684	8.249	30 kPa	DMSO
605	0.01	29.70476034	4.081	30 kPa	DMSO
606	0.02	30.08923178	4.055	30 kPa	DMSO
607	0.03	30.32405824	3.762	30 kPa	DMSO
608	0.04	30.26747745	3.572	30 kPa	DMSO
609	0.05	30.72159308	3.506	30 kPa	DMSO
610	0.06	31.13277025	3.509	30 kPa	DMSO
611	0.07	31.12813202	3.546	30 kPa	DMSO
612	0.08	31.34678799	3.578	30 kPa	DMSO
613	0.09	31.39055381	3.591	30 kPa	DMSO
614	0.1	31.54041858	3.581	30 kPa	DMSO
615	0.11	31.676564	3.462	30 kPa	DMSO
616	0.12	31.90101479	3.443	30 kPa	DMSO
617	0.13	31.95310101	3.175	30 kPa	DMSO
618	0.14	31.51704741	2.924	30 kPa	DMSO
619	0.15	31.78876016	2.772	30 kPa	DMSO
620	0.16	31.72370998	2.604	30 kPa	DMSO
621	0.17	31.56457164	2.506	30 kPa	DMSO
622	0.18	31.29950976	2.367	30 kPa	DMSO
623	0.19	31.13862899	2.334	30 kPa	DMSO
624	0.2	31.29421958	2.437	30 kPa	DMSO
625	0.21	31.32996289	2.411	30 kPa	DMSO
626	0.22	31.200203	2.419	30 kPa	DMSO
627	0.23	31.38876061	2.508	30 kPa	DMSO
628	0.24	31.10601056	2.468	30 kPa	DMSO
629	0.25	31.08918289	2.489	30 kPa	DMSO
630	0.26	31.07244434	2.51	30 kPa	DMSO
631	0.27	31.31108281	2.456	30 kPa	DMSO
632	0.28	31.11056677	2.371	30 kPa	DMSO
633	0.29	31.18106132	2.305	30 kPa	DMSO
634	0.3	30.90309118	2.182	30 kPa	DMSO
635	0.31	31.01408787	2.14	30 kPa	DMSO
636	0.32	30.91303622	2.053	30 kPa	DMSO
637	0.33	30.97385482	2.03	30 kPa	DMSO
638	0.34	30.94859447	1.994	30 kPa	DMSO
639	0.35	30.79696016	1.897	30 kPa	DMSO
640	0.36	31.11290581	1.933	30 kPa	DMSO
641	0.37	31.25822426	1.993	30 kPa	DMSO
642	0.38	31.0469477	2.016	30 kPa	DMSO
643	0.39	31.36746024	2.076	30 kPa	DMSO
644	0.4	31.38950501	2.06	30 kPa	DMSO
645	0.41	31.4113363	2.118	30 kPa	DMSO
646	0.42	31.62461731	2.202	30 kPa	DMSO
647	0.43	31.76981035	2.286	30 kPa	DMSO
648	0.44	31.83897977	2.345	30 kPa	DMSO
649	0.45	32.01686004	2.412	30 kPa	DMSO
650	0.46	32.0077735	2.429	30 kPa	DMSO
651	0.47	32.25121369	2.462	30 kPa	DMSO
652	0.48	32.38236208	2.464	30 kPa	DMSO
653	0.49	32.22472194	2.38	30 kPa	DMSO
654	0.5	32.56847338	2.519	30 kPa	DMSO
655	0.51	32.32373951	2.406	30 kPa	DMSO
656	0.52	32.44652877	2.368	30 kPa	DMSO
657	0.53	32.47657605	2.346	30 kPa	DMSO
658	0.54	32.37923234	2.336	30 kPa	DMSO
659	0.55	32.99031146	2.412	30 kPa	DMSO
660	0.56	32.89884421	2.37	30 kPa	DMSO
661	0.57	33.00727923	2.397	30 kPa	DMSO
662	0.58	33.35441345	2.488	30 kPa	DMSO
663	0.59	33.74683859	2.583	30 kPa	DMSO
664	0.6	34.17296116	2.737	30 kPa	DMSO
665	0.61	34.40608542	2.797	30 kPa	DMSO
666	0.62	34.66355523	2.881	30 kPa	DMSO
667	0.63	35.11378766	3.041	30 kPa	DMSO
668	0.64	35.48343166	3.138	30 kPa	DMSO
669	0.65	35.79698996	3.141	30 kPa	DMSO
670	0.66	36.32031045	3.231	30 kPa	DMSO
671	0.67	36.57155834	3.277	30 kPa	DMSO
672	0.68	36.85100429	3.294	30 kPa	DMSO
673	0.69	37.03853617	3.238	30 kPa	DMSO
674	0.7	37.08900074	3.228	30 kPa	DMSO
675	0.71	37.75344491	3.19	30 kPa	DMSO
676	0.72	38.00832273	3.058	30 kPa	DMSO
677	0.73	38.46563151	3.036	30 kPa	DMSO
678	0.74	38.76192828	2.975	30 kPa	DMSO
679	0.75	39.32462686	2.876	30 kPa	DMSO
680	0.76	39.9604057	2.891	30 kPa	DMSO
681	0.77	40.24317643	2.816	30 kPa	DMSO
682	0.78	41.01683032	2.857	30 kPa	DMSO
683	0.79	41.49455356	2.815	30 kPa	DMSO
684	0.8	42.33230189	2.914	30 kPa	DMSO
685	0.81	42.79400063	2.905	30 kPa	DMSO
686	0.82	43.91329495	3.026	30 kPa	DMSO
687	0.83	45.01618118	3.071	30 kPa	DMSO
688	0.84	46.7867535	3.122	30 kPa	DMSO
689	0.85	49.11571431	3.252	30 kPa	DMSO
690	0.86	51.80072945	3.281	30 kPa	DMSO
691	0.87	55.69297149	3.455	30 kPa	DMSO
692	0.88	60.885216	3.878	30 kPa	DMSO
693	0.89	66.88115304	4.185	30 kPa	DMSO
694	0.9	71.9962453	4.257	30 kPa	DMSO
695	0.91	79.76594594	4.742	30 kPa	DMSO
696	0.92	88.49689823	5.574	30 kPa	DMSO
697	0.93	97.26793073	6.175	30 kPa	DMSO
698	0.94	105.7695916	6.496	30 kPa	DMSO
699	0.95	114.0442671	7.373	30 kPa	DMSO
700	0.96	119.4141921	8.098	30 kPa	DMSO
701	0.97	122.52582	8.514	30 kPa	DMSO
702	0.98	124.9040519	8.885	30 kPa	DMSO
703	0.99	121.9021647	9.062	30 kPa	DMSO
704	1	113.5951701	8.44	30 kPa	DMSO
913	0.01	26.8655856	2.868	30 kPa	DMSO
914	0.02	25.68489499	2.692	30 kPa	DMSO
915	0.03	26.65995361	2.659	30 kPa	DMSO
916	0.04	26.50515872	2.546	30 kPa	DMSO
917	0.05	26.17913141	2.41	30 kPa	DMSO
918	0.06	25.73407818	2.285	30 kPa	DMSO
919	0.07	25.46256369	2.158	30 kPa	DMSO
920	0.08	25.01751031	2.063	30 kPa	DMSO
921	0.09	24.61686824	2.019	30 kPa	DMSO
922	0.1	24.51404135	1.98	30 kPa	DMSO
923	0.11	24.62461923	1.959	30 kPa	DMSO
924	0.12	24.69084103	1.92	30 kPa	DMSO
925	0.13	25.07730479	1.774	30 kPa	DMSO
926	0.14	25.54331066	1.702	30 kPa	DMSO
927	0.15	26.08538975	1.697	30 kPa	DMSO
928	0.16	26.06133464	1.557	30 kPa	DMSO
929	0.17	26.85758831	1.632	30 kPa	DMSO
930	0.18	26.91030625	1.527	30 kPa	DMSO
931	0.19	27.09570043	1.516	30 kPa	DMSO
932	0.2	27.40304698	1.553	30 kPa	DMSO
933	0.21	27.50375994	1.541	30 kPa	DMSO
934	0.22	27.79315897	1.604	30 kPa	DMSO
935	0.23	27.59502802	1.513	30 kPa	DMSO
936	0.24	27.81856022	1.56	30 kPa	DMSO
937	0.25	27.85129333	1.561	30 kPa	DMSO
938	0.26	27.51919871	1.488	30 kPa	DMSO
939	0.27	27.52513228	1.462	30 kPa	DMSO
940	0.28	27.55803219	1.476	30 kPa	DMSO
941	0.29	27.41381213	1.462	30 kPa	DMSO
942	0.3	27.51738317	1.479	30 kPa	DMSO
943	0.31	27.34661421	1.478	30 kPa	DMSO
944	0.32	27.15686739	1.489	30 kPa	DMSO
945	0.33	27.10668555	1.526	30 kPa	DMSO
946	0.34	27.14475715	1.52	30 kPa	DMSO
947	0.35	27.13694575	1.567	30 kPa	DMSO
948	0.36	27.1265173	1.556	30 kPa	DMSO
949	0.37	26.9398189	1.545	30 kPa	DMSO
950	0.38	27.00607832	1.575	30 kPa	DMSO
951	0.39	27.10094517	1.614	30 kPa	DMSO
952	0.4	27.26130271	1.606	30 kPa	DMSO
953	0.41	27.41817524	1.608	30 kPa	DMSO
954	0.42	27.44448745	1.641	30 kPa	DMSO
955	0.43	27.71386316	1.682	30 kPa	DMSO
956	0.44	27.95884658	1.689	30 kPa	DMSO
957	0.45	28.26305045	1.722	30 kPa	DMSO
958	0.46	28.44213747	1.707	30 kPa	DMSO
959	0.47	28.88359525	1.748	30 kPa	DMSO
960	0.48	29.22216484	1.757	30 kPa	DMSO
961	0.49	29.38351274	1.722	30 kPa	DMSO
962	0.5	29.81783219	1.733	30 kPa	DMSO
963	0.51	30.1861661	1.729	30 kPa	DMSO
964	0.52	30.50690586	1.747	30 kPa	DMSO
965	0.53	30.70045244	1.747	30 kPa	DMSO
966	0.54	31.15421223	1.766	30 kPa	DMSO
967	0.55	31.48534619	1.802	30 kPa	DMSO
968	0.56	31.80375006	1.837	30 kPa	DMSO
969	0.57	31.9949236	1.862	30 kPa	DMSO
970	0.58	32.42586241	1.922	30 kPa	DMSO
971	0.59	32.53172646	1.95	30 kPa	DMSO
972	0.6	32.82458735	2.024	30 kPa	DMSO
973	0.61	32.90425275	2.016	30 kPa	DMSO
974	0.62	33.15219037	2.023	30 kPa	DMSO
975	0.63	33.46801924	2.104	30 kPa	DMSO
976	0.64	33.59904494	2.122	30 kPa	DMSO
977	0.65	33.40696867	2.05	30 kPa	DMSO
978	0.66	33.93921422	2.14	30 kPa	DMSO
979	0.67	33.91028677	2.077	30 kPa	DMSO
980	0.68	34.28847903	2.142	30 kPa	DMSO
981	0.69	34.21140879	2.101	30 kPa	DMSO
982	0.7	34.49407009	2.091	30 kPa	DMSO
983	0.71	34.93482552	2.139	30 kPa	DMSO
984	0.72	34.98468983	2.061	30 kPa	DMSO
985	0.73	35.54823762	2.104	30 kPa	DMSO
986	0.74	36.14061015	2.092	30 kPa	DMSO
987	0.75	36.44558279	2.051	30 kPa	DMSO
988	0.76	37.20719527	2.102	30 kPa	DMSO
989	0.77	37.6880155	2.07	30 kPa	DMSO
990	0.78	38.64264196	2.275	30 kPa	DMSO
991	0.79	39.48008844	2.403	30 kPa	DMSO
992	0.8	40.63536444	2.552	30 kPa	DMSO
993	0.81	42.09500778	2.86	30 kPa	DMSO
994	0.82	43.76530051	3.122	30 kPa	DMSO
995	0.83	45.42432644	3.372	30 kPa	DMSO
996	0.84	48.31030214	3.807	30 kPa	DMSO
997	0.85	51.07705127	4.136	30 kPa	DMSO
998	0.86	55.13283172	4.63	30 kPa	DMSO
999	0.87	58.97745337	5.176	30 kPa	DMSO
1000	0.88	63.44909533	5.637	30 kPa	DMSO
1001	0.89	68.9905743	6.373	30 kPa	DMSO
1002	0.9	74.830901	6.982	30 kPa	DMSO
1003	0.91	82.08917033	7.957	30 kPa	DMSO
1004	0.92	89.08489338	8.334	30 kPa	DMSO
1005	0.93	95.43165058	8.509	30 kPa	DMSO
1006	0.94	104.0026851	9.205	30 kPa	DMSO
1007	0.95	110.7160366	9.372	30 kPa	DMSO
1008	0.96	118.9519987	9.91	30 kPa	DMSO
1009	0.97	129.0499589	11.408	30 kPa	DMSO
1010	0.98	129.5544721	10.877	30 kPa	DMSO
1011	0.99	122.4124367	10.54	30 kPa	DMSO
1012	1	107.9036257	9.378	30 kPa	DMSO
1233	0.01	9.220744074	1.356	4 kPa	DMSO
1234	0.02	9.221041305	1.326	4 kPa	DMSO
1235	0.03	9.304656827	1.296	4 kPa	DMSO
1236	0.04	9.189117434	1.244	4 kPa	DMSO
1237	0.05	9.21406732	1.208	4 kPa	DMSO
1238	0.06	9.297046488	1.226	4 kPa	DMSO
1239	0.07	9.312457824	1.2	4 kPa	DMSO
1240	0.08	9.337840098	1.206	4 kPa	DMSO
1241	0.09	9.487482856	1.248	4 kPa	DMSO
1242	0.1	9.514787107	1.297	4 kPa	DMSO
1243	0.11	9.659812072	1.361	4 kPa	DMSO
1244	0.12	9.789795376	1.41	4 kPa	DMSO
1245	0.13	9.951025568	1.498	4 kPa	DMSO
1246	0.14	10.15615727	1.527	4 kPa	DMSO
1247	0.15	10.19037733	1.519	4 kPa	DMSO
1248	0.16	10.36604422	1.571	4 kPa	DMSO
1249	0.17	10.52419364	1.594	4 kPa	DMSO
1250	0.18	10.57743274	1.544	4 kPa	DMSO
1251	0.19	10.75421779	1.527	4 kPa	DMSO
1252	0.2	10.82383179	1.513	4 kPa	DMSO
1253	0.21	10.94256344	1.535	4 kPa	DMSO
1254	0.22	11.08259129	1.551	4 kPa	DMSO
1255	0.23	11.14853761	1.468	4 kPa	DMSO
1256	0.24	11.31619277	1.575	4 kPa	DMSO
1257	0.25	11.44081455	1.607	4 kPa	DMSO
1258	0.26	11.63529995	1.644	4 kPa	DMSO
1259	0.27	11.72813178	1.718	4 kPa	DMSO
1260	0.28	11.85966725	1.773	4 kPa	DMSO
1261	0.29	11.95974803	1.797	4 kPa	DMSO
1262	0.3	12.14808024	1.866	4 kPa	DMSO
1263	0.31	12.26868567	1.928	4 kPa	DMSO
1264	0.32	12.29822265	1.884	4 kPa	DMSO
1265	0.33	12.4239843	1.884	4 kPa	DMSO
1266	0.34	12.61775032	1.89	4 kPa	DMSO
1267	0.35	12.7759802	1.939	4 kPa	DMSO
1268	0.36	12.91385146	1.857	4 kPa	DMSO
1269	0.37	13.06683036	1.785	4 kPa	DMSO
1270	0.38	13.51656305	1.783	4 kPa	DMSO
1271	0.39	13.95948496	1.843	4 kPa	DMSO
1272	0.4	14.16690241	1.708	4 kPa	DMSO
1273	0.41	14.56508039	1.722	4 kPa	DMSO
1274	0.42	15.15398781	1.782	4 kPa	DMSO
1275	0.43	15.72671932	1.892	4 kPa	DMSO
1276	0.44	16.2420923	1.972	4 kPa	DMSO
1277	0.45	16.75767542	2.096	4 kPa	DMSO
1278	0.46	17.21579137	2.164	4 kPa	DMSO
1279	0.47	17.87359612	2.347	4 kPa	DMSO
1280	0.48	18.38323183	2.428	4 kPa	DMSO
1281	0.49	18.7739935	2.468	4 kPa	DMSO
1282	0.5	19.16736086	2.521	4 kPa	DMSO
1283	0.51	19.74703774	2.554	4 kPa	DMSO
1284	0.52	20.09994973	2.574	4 kPa	DMSO
1285	0.53	20.44951096	2.555	4 kPa	DMSO
1286	0.54	20.85783037	2.602	4 kPa	DMSO
1287	0.55	21.26710954	2.569	4 kPa	DMSO
1288	0.56	21.53769307	2.529	4 kPa	DMSO
1289	0.57	21.91642429	2.537	4 kPa	DMSO
1290	0.58	22.2859605	2.435	4 kPa	DMSO
1291	0.59	22.52973511	2.373	4 kPa	DMSO
1292	0.6	22.78904622	2.333	4 kPa	DMSO
1293	0.61	23.22576615	2.266	4 kPa	DMSO
1294	0.62	24.05038277	2.281	4 kPa	DMSO
1295	0.63	24.63472829	2.272	4 kPa	DMSO
1296	0.64	25.1738976	2.281	4 kPa	DMSO
1297	0.65	25.96625543	2.317	4 kPa	DMSO
1298	0.66	26.88440144	2.293	4 kPa	DMSO
1299	0.67	27.72871547	2.367	4 kPa	DMSO
1300	0.68	28.71522656	2.389	4 kPa	DMSO
1301	0.69	29.62151099	2.382	4 kPa	DMSO
1302	0.7	30.35109656	2.368	4 kPa	DMSO
1303	0.71	31.39966124	2.416	4 kPa	DMSO
1304	0.72	32.31106716	2.434	4 kPa	DMSO
1305	0.73	33.23951533	2.494	4 kPa	DMSO
1306	0.74	33.6631074	2.436	4 kPa	DMSO
1307	0.75	34.26321975	2.41	4 kPa	DMSO
1308	0.76	35.17249456	2.542	4 kPa	DMSO
1309	0.77	35.64143875	2.589	4 kPa	DMSO
1310	0.78	35.84979037	2.654	4 kPa	DMSO
1311	0.79	36.15030304	2.703	4 kPa	DMSO
1312	0.8	36.8173505	2.846	4 kPa	DMSO
1313	0.81	37.74055744	3.045	4 kPa	DMSO
1314	0.82	38.73416369	3.263	4 kPa	DMSO
1315	0.83	40.11995245	3.564	4 kPa	DMSO
1316	0.84	42.06813282	3.914	4 kPa	DMSO
1317	0.85	44.54218865	4.277	4 kPa	DMSO
1318	0.86	48.27109768	4.832	4 kPa	DMSO
1319	0.87	52.46437295	5.278	4 kPa	DMSO
1320	0.88	58.17107	5.788	4 kPa	DMSO
1321	0.89	64.77718906	6.152	4 kPa	DMSO
1322	0.9	72.01891173	6.656	4 kPa	DMSO
1323	0.91	80.12917947	7.204	4 kPa	DMSO
1324	0.92	89.77827213	7.731	4 kPa	DMSO
1325	0.93	99.09907542	8.488	4 kPa	DMSO
1326	0.94	108.0167319	9.108	4 kPa	DMSO
1327	0.95	119.6834941	10.543	4 kPa	DMSO
1328	0.96	132.6339227	12.051	4 kPa	DMSO
1329	0.97	145.699927	13.545	4 kPa	DMSO
1330	0.98	152.5911602	14.829	4 kPa	DMSO
1331	0.99	145.1605546	15.265	4 kPa	DMSO
1332	1	119.1920638	11.529	4 kPa	DMSO
1496	0.01	9.245483218	1.369	4 kPa	DMSO
1497	0.02	9.201828027	1.343	4 kPa	DMSO
1498	0.03	9.277866593	1.328	4 kPa	DMSO
1499	0.04	9.316121706	1.297	4 kPa	DMSO
1500	0.05	9.403449207	1.277	4 kPa	DMSO
1501	0.06	9.568067079	1.294	4 kPa	DMSO
1502	0.07	9.600409598	1.297	4 kPa	DMSO
1503	0.08	9.652819254	1.305	4 kPa	DMSO
1504	0.09	9.786965032	1.338	4 kPa	DMSO
1505	0.1	9.892272083	1.351	4 kPa	DMSO
1506	0.11	10.05383372	1.366	4 kPa	DMSO
1507	0.12	9.977443486	1.314	4 kPa	DMSO
1508	0.13	9.922345483	1.276	4 kPa	DMSO
1509	0.14	9.896954698	1.237	4 kPa	DMSO
1510	0.15	9.965316607	1.214	4 kPa	DMSO
1511	0.16	9.919615426	1.185	4 kPa	DMSO
1512	0.17	10.00783224	1.234	4 kPa	DMSO
1513	0.18	9.894511529	1.163	4 kPa	DMSO
1514	0.19	9.934745082	1.141	4 kPa	DMSO
1515	0.2	10.05858245	1.114	4 kPa	DMSO
1516	0.21	10.20491558	1.14	4 kPa	DMSO
1517	0.22	10.35740339	1.141	4 kPa	DMSO
1518	0.23	10.49447505	1.151	4 kPa	DMSO
1519	0.24	10.74356139	1.157	4 kPa	DMSO
1520	0.25	10.97644532	1.201	4 kPa	DMSO
1521	0.26	11.32907899	1.272	4 kPa	DMSO
1522	0.27	11.51358587	1.307	4 kPa	DMSO
1523	0.28	11.82805132	1.374	4 kPa	DMSO
1524	0.29	11.97022632	1.351	4 kPa	DMSO
1525	0.3	12.20481587	1.445	4 kPa	DMSO
1526	0.31	12.54420498	1.479	4 kPa	DMSO
1527	0.32	12.82573426	1.51	4 kPa	DMSO
1528	0.33	12.91682364	1.491	4 kPa	DMSO
1529	0.34	13.12349675	1.518	4 kPa	DMSO
1530	0.35	13.26427377	1.537	4 kPa	DMSO
1531	0.36	13.5225129	1.587	4 kPa	DMSO
1532	0.37	13.64969851	1.56	4 kPa	DMSO
1533	0.38	13.71368562	1.534	4 kPa	DMSO
1534	0.39	13.83643733	1.575	4 kPa	DMSO
1535	0.4	13.80288711	1.551	4 kPa	DMSO
1536	0.41	13.77078626	1.485	4 kPa	DMSO
1537	0.42	13.85461235	1.444	4 kPa	DMSO
1538	0.43	14.05404601	1.448	4 kPa	DMSO
1539	0.44	13.97646189	1.394	4 kPa	DMSO
1540	0.45	14.13376614	1.383	4 kPa	DMSO
1541	0.46	14.34087683	1.388	4 kPa	DMSO
1542	0.47	14.45561686	1.389	4 kPa	DMSO
1543	0.48	14.75403269	1.415	4 kPa	DMSO
1544	0.49	14.94758047	1.451	4 kPa	DMSO
1545	0.5	15.15739976	1.469	4 kPa	DMSO
1546	0.51	15.35786053	1.495	4 kPa	DMSO
1547	0.52	15.68985241	1.566	4 kPa	DMSO
1548	0.53	15.6915651	1.569	4 kPa	DMSO
1549	0.54	15.91104016	1.624	4 kPa	DMSO
1550	0.55	16.11379662	1.651	4 kPa	DMSO
1551	0.56	16.34789324	1.687	4 kPa	DMSO
1552	0.57	16.57272114	1.709	4 kPa	DMSO
1553	0.58	16.69261255	1.719	4 kPa	DMSO
1554	0.59	16.99249924	1.743	4 kPa	DMSO
1555	0.6	17.27469081	1.757	4 kPa	DMSO
1556	0.61	17.51018825	1.751	4 kPa	DMSO
1557	0.62	17.82306417	1.772	4 kPa	DMSO
1558	0.63	17.94099677	1.795	4 kPa	DMSO
1559	0.64	18.36675011	1.832	4 kPa	DMSO
1560	0.65	18.78316482	1.835	4 kPa	DMSO
1561	0.66	19.24945522	1.901	4 kPa	DMSO
1562	0.67	19.75751951	1.959	4 kPa	DMSO
1563	0.68	20.35043385	2.037	4 kPa	DMSO
1564	0.69	21.08483927	2.108	4 kPa	DMSO
1565	0.7	21.74448901	2.143	4 kPa	DMSO
1566	0.71	22.49285208	2.228	4 kPa	DMSO
1567	0.72	23.13342765	2.355	4 kPa	DMSO
1568	0.73	23.73011806	2.376	4 kPa	DMSO
1569	0.74	24.45752948	2.41	4 kPa	DMSO
1570	0.75	24.93282743	2.487	4 kPa	DMSO
1571	0.76	25.22089434	2.501	4 kPa	DMSO
1572	0.77	25.51057844	2.514	4 kPa	DMSO
1573	0.78	25.60551357	2.569	4 kPa	DMSO
1574	0.79	26.00409314	2.669	4 kPa	DMSO
1575	0.8	25.97214156	2.766	4 kPa	DMSO
1576	0.81	26.47942362	2.97	4 kPa	DMSO
1577	0.82	27.34407304	3.248	4 kPa	DMSO
1578	0.83	28.56768472	3.538	4 kPa	DMSO
1579	0.84	30.45776507	3.9	4 kPa	DMSO
1580	0.85	32.90785265	4.211	4 kPa	DMSO
1581	0.86	36.13014724	4.631	4 kPa	DMSO
1582	0.87	40.06278212	4.954	4 kPa	DMSO
1583	0.88	44.96759673	5.419	4 kPa	DMSO
1584	0.89	50.52263532	5.88	4 kPa	DMSO
1585	0.9	56.98664349	6.474	4 kPa	DMSO
1586	0.91	63.93022985	7.13	4 kPa	DMSO
1587	0.92	71.69576891	7.916	4 kPa	DMSO
1588	0.93	81.24455474	8.868	4 kPa	DMSO
1589	0.94	91.40059349	9.986	4 kPa	DMSO
1590	0.95	101.0100961	11.075	4 kPa	DMSO
1591	0.96	108.60799	12.326	4 kPa	DMSO
1592	0.97	114.4921164	13.168	4 kPa	DMSO
1593	0.98	117.8080778	14.388	4 kPa	DMSO
1594	0.99	112.4427801	14.926	4 kPa	DMSO
1595	1	100.4229963	15.146	4 kPa	DMSO
1752	0.01	13.28178426	2.582	4 kPa	DMSO
1753	0.02	13.22678129	2.521	4 kPa	DMSO
1754	0.03	13.17199315	2.429	4 kPa	DMSO
1755	0.04	13.02908112	2.334	4 kPa	DMSO
1756	0.05	12.96321968	2.26	4 kPa	DMSO
1757	0.06	12.97519666	2.213	4 kPa	DMSO
1758	0.07	12.91404326	2.182	4 kPa	DMSO
1759	0.08	12.81453676	2.167	4 kPa	DMSO
1760	0.09	12.73039943	2.166	4 kPa	DMSO
1761	0.1	12.60424914	2.202	4 kPa	DMSO
1762	0.11	12.54358591	2.195	4 kPa	DMSO
1763	0.12	12.34954957	2.145	4 kPa	DMSO
1764	0.13	12.3192351	2.171	4 kPa	DMSO
1765	0.14	12.36077574	2.148	4 kPa	DMSO
1766	0.15	12.18215358	2.013	4 kPa	DMSO
1767	0.16	12.11679121	1.931	4 kPa	DMSO
1768	0.17	12.32420477	1.958	4 kPa	DMSO
1769	0.18	12.5608998	1.864	4 kPa	DMSO
1770	0.19	12.30963236	1.728	4 kPa	DMSO
1771	0.2	12.42948598	1.726	4 kPa	DMSO
1772	0.21	12.56182008	1.646	4 kPa	DMSO
1773	0.22	12.5998192	1.586	4 kPa	DMSO
1774	0.23	12.89030393	1.614	4 kPa	DMSO
1775	0.24	12.92999394	1.571	4 kPa	DMSO
1776	0.25	12.9831336	1.558	4 kPa	DMSO
1777	0.26	13.38423648	1.67	4 kPa	DMSO
1778	0.27	13.58023619	1.704	4 kPa	DMSO
1779	0.28	13.74157051	1.724	4 kPa	DMSO
1780	0.29	13.82969855	1.757	4 kPa	DMSO
1781	0.3	14.03264294	1.816	4 kPa	DMSO
1782	0.31	14.17993752	1.785	4 kPa	DMSO
1783	0.32	14.35483348	1.728	4 kPa	DMSO
1784	0.33	14.41901649	1.756	4 kPa	DMSO
1785	0.34	14.42183614	1.671	4 kPa	DMSO
1786	0.35	14.5746256	1.587	4 kPa	DMSO
1787	0.36	14.75979438	1.502	4 kPa	DMSO
1788	0.37	14.78007506	1.407	4 kPa	DMSO
1789	0.38	14.8201773	1.335	4 kPa	DMSO
1790	0.39	15.29807105	1.32	4 kPa	DMSO
1791	0.4	15.45785373	1.15	4 kPa	DMSO
1792	0.41	15.76500669	1.173	4 kPa	DMSO
1793	0.42	16.23596782	1.246	4 kPa	DMSO
1794	0.43	16.83419879	1.283	4 kPa	DMSO
1795	0.44	17.3180991	1.295	4 kPa	DMSO
1796	0.45	18.16559377	1.444	4 kPa	DMSO
1797	0.46	18.70989859	1.581	4 kPa	DMSO
1798	0.47	19.54874236	1.694	4 kPa	DMSO
1799	0.48	20.11128371	1.78	4 kPa	DMSO
1800	0.49	20.83249544	1.9	4 kPa	DMSO
1801	0.5	21.50792434	2.038	4 kPa	DMSO
1802	0.51	22.02701028	2.098	4 kPa	DMSO
1803	0.52	22.56667327	2.192	4 kPa	DMSO
1804	0.53	22.96911158	2.161	4 kPa	DMSO
1805	0.54	23.59150017	2.262	4 kPa	DMSO
1806	0.55	23.90627043	2.274	4 kPa	DMSO
1807	0.56	24.25307954	2.252	4 kPa	DMSO
1808	0.57	24.73532913	2.199	4 kPa	DMSO
1809	0.58	25.163665	2.21	4 kPa	DMSO
1810	0.59	25.59647932	2.173	4 kPa	DMSO
1811	0.6	25.74105423	2.072	4 kPa	DMSO
1812	0.61	26.4515107	2.078	4 kPa	DMSO
1813	0.62	26.91517267	2.062	4 kPa	DMSO
1814	0.63	27.51727791	2.001	4 kPa	DMSO
1815	0.64	27.88008538	1.963	4 kPa	DMSO
1816	0.65	28.63881193	1.879	4 kPa	DMSO
1817	0.66	29.19904493	1.905	4 kPa	DMSO
1818	0.67	29.87691819	1.824	4 kPa	DMSO
1819	0.68	30.84248442	1.864	4 kPa	DMSO
1820	0.69	31.0970692	1.784	4 kPa	DMSO
1821	0.7	31.98179042	1.892	4 kPa	DMSO
1822	0.71	32.37426834	1.893	4 kPa	DMSO
1823	0.72	32.94990519	1.931	4 kPa	DMSO
1824	0.73	33.46854383	2.015	4 kPa	DMSO
1825	0.74	33.79544983	2.026	4 kPa	DMSO
1826	0.75	34.29177783	2.104	4 kPa	DMSO
1827	0.76	34.21757032	2.133	4 kPa	DMSO
1828	0.77	34.91228956	2.134	4 kPa	DMSO
1829	0.78	35.05755934	2.133	4 kPa	DMSO
1830	0.79	35.21552705	2.134	4 kPa	DMSO
1831	0.8	35.8332802	2.249	4 kPa	DMSO
1832	0.81	37.05667632	2.273	4 kPa	DMSO
1833	0.82	38.57992598	2.408	4 kPa	DMSO
1834	0.83	40.38497783	2.385	4 kPa	DMSO
1835	0.84	43.50470804	2.76	4 kPa	DMSO
1836	0.85	47.70676365	3.078	4 kPa	DMSO
1837	0.86	51.88668688	3.528	4 kPa	DMSO
1838	0.87	57.2698038	4.132	4 kPa	DMSO
1839	0.88	63.3559066	4.634	4 kPa	DMSO
1840	0.89	70.11495274	5.313	4 kPa	DMSO
1841	0.9	77.6738309	6.029	4 kPa	DMSO
1842	0.91	85.59689146	6.77	4 kPa	DMSO
1843	0.92	94.76892899	7.598	4 kPa	DMSO
1844	0.93	104.6332621	8.418	4 kPa	DMSO
1845	0.94	112.321685	9.368	4 kPa	DMSO
1846	0.95	123.0245288	10.297	4 kPa	DMSO
1847	0.96	133.2250097	12.393	4 kPa	DMSO
1848	0.97	141.1479159	14.159	4 kPa	DMSO
1849	0.98	142.7755218	15.235	4 kPa	DMSO
1850	0.99	135.2618243	14.113	4 kPa	DMSO
1851	1	120.3237024	10.801	4 kPa	DMSO
2040	0.01	9.486054331	2.328	4 kPa	DMSO
2041	0.02	9.513168629	2.259	4 kPa	DMSO
2042	0.03	9.508417533	2.169	4 kPa	DMSO
2043	0.04	9.46592842	2.103	4 kPa	DMSO
2044	0.05	9.399733854	1.95	4 kPa	DMSO
2045	0.06	9.415886044	1.822	4 kPa	DMSO
2046	0.07	9.398170501	1.715	4 kPa	DMSO
2047	0.08	9.457627127	1.615	4 kPa	DMSO
2048	0.09	9.528920344	1.515	4 kPa	DMSO
2049	0.1	9.699291114	1.458	4 kPa	DMSO
2050	0.11	9.746666684	1.368	4 kPa	DMSO
2051	0.12	9.771157064	1.294	4 kPa	DMSO
2052	0.13	9.982343515	1.262	4 kPa	DMSO
2053	0.14	10.14210077	1.208	4 kPa	DMSO
2054	0.15	10.13645017	1.175	4 kPa	DMSO
2055	0.16	10.15741592	1.143	4 kPa	DMSO
2056	0.17	10.25107064	1.152	4 kPa	DMSO
2057	0.18	10.42224202	1.186	4 kPa	DMSO
2058	0.19	10.5276979	1.231	4 kPa	DMSO
2059	0.2	10.68147772	1.321	4 kPa	DMSO
2060	0.21	10.85383784	1.361	4 kPa	DMSO
2061	0.22	11.02084474	1.426	4 kPa	DMSO
2062	0.23	11.23122162	1.508	4 kPa	DMSO
2063	0.24	11.390978	1.561	4 kPa	DMSO
2064	0.25	11.63532095	1.63	4 kPa	DMSO
2065	0.26	11.91228645	1.691	4 kPa	DMSO
2066	0.27	12.14835336	1.72	4 kPa	DMSO
2067	0.28	12.40736374	1.726	4 kPa	DMSO
2068	0.29	12.78775273	1.766	4 kPa	DMSO
2069	0.3	13.00544082	1.782	4 kPa	DMSO
2070	0.31	13.17161483	1.782	4 kPa	DMSO
2071	0.32	13.51088773	1.789	4 kPa	DMSO
2072	0.33	13.63068489	1.765	4 kPa	DMSO
2073	0.34	13.67513684	1.772	4 kPa	DMSO
2074	0.35	13.74935148	1.796	4 kPa	DMSO
2075	0.36	13.83501582	1.793	4 kPa	DMSO
2076	0.37	13.89300443	1.799	4 kPa	DMSO
2077	0.38	14.00575272	1.847	4 kPa	DMSO
2078	0.39	13.98797904	1.783	4 kPa	DMSO
2079	0.4	14.27372267	1.816	4 kPa	DMSO
2080	0.41	14.41956272	1.788	4 kPa	DMSO
2081	0.42	14.80391578	1.827	4 kPa	DMSO
2082	0.43	15.28847552	1.904	4 kPa	DMSO
2083	0.44	15.54361276	1.928	4 kPa	DMSO
2084	0.45	15.95197728	1.984	4 kPa	DMSO
2085	0.46	16.61499572	2.116	4 kPa	DMSO
2086	0.47	17.16091066	2.215	4 kPa	DMSO
2087	0.48	17.60092822	2.273	4 kPa	DMSO
2088	0.49	17.97106055	2.393	4 kPa	DMSO
2089	0.5	18.44893537	2.51	4 kPa	DMSO
2090	0.51	18.9100084	2.545	4 kPa	DMSO
2091	0.52	19.38092744	2.669	4 kPa	DMSO
2092	0.53	19.88653542	2.755	4 kPa	DMSO
2093	0.54	20.06669082	2.806	4 kPa	DMSO
2094	0.55	20.43388397	2.812	4 kPa	DMSO
2095	0.56	20.89876892	2.866	4 kPa	DMSO
2096	0.57	21.03920458	2.881	4 kPa	DMSO
2097	0.58	21.40861575	2.946	4 kPa	DMSO
2098	0.59	21.469571	2.955	4 kPa	DMSO
2099	0.6	21.65703446	2.97	4 kPa	DMSO
2100	0.61	21.75534304	2.979	4 kPa	DMSO
2101	0.62	22.16322824	3.074	4 kPa	DMSO
2102	0.63	22.53625183	3.184	4 kPa	DMSO
2103	0.64	22.85457421	3.274	4 kPa	DMSO
2104	0.65	23.25207635	3.433	4 kPa	DMSO
2105	0.66	23.77386914	3.562	4 kPa	DMSO
2106	0.67	24.28397543	3.604	4 kPa	DMSO
2107	0.68	25.14643495	3.799	4 kPa	DMSO
2108	0.69	25.84826051	3.891	4 kPa	DMSO
2109	0.7	26.44684296	4.024	4 kPa	DMSO
2110	0.71	27.17734764	4.101	4 kPa	DMSO
2111	0.72	27.87113061	4.159	4 kPa	DMSO
2112	0.73	28.47674149	4.207	4 kPa	DMSO
2113	0.74	29.08022626	4.29	4 kPa	DMSO
2114	0.75	29.72532297	4.32	4 kPa	DMSO
2115	0.76	30.13296503	4.331	4 kPa	DMSO
2116	0.77	30.46047552	4.358	4 kPa	DMSO
2117	0.78	31.07726759	4.443	4 kPa	DMSO
2118	0.79	31.84987059	4.611	4 kPa	DMSO
2119	0.8	32.70051211	4.856	4 kPa	DMSO
2120	0.81	33.7579812	5.219	4 kPa	DMSO
2121	0.82	34.94859709	5.576	4 kPa	DMSO
2122	0.83	37.17324553	6.252	4 kPa	DMSO
2123	0.84	39.70075226	6.921	4 kPa	DMSO
2124	0.85	43.38263376	7.678	4 kPa	DMSO
2125	0.86	47.44248152	8.394	4 kPa	DMSO
2126	0.87	52.21135882	9.309	4 kPa	DMSO
2127	0.88	57.92561096	10.326	4 kPa	DMSO
2128	0.89	64.28065966	11.315	4 kPa	DMSO
2129	0.9	71.48746935	12.479	4 kPa	DMSO
2130	0.91	79.08682077	13.977	4 kPa	DMSO
2131	0.92	86.43171538	15.356	4 kPa	DMSO
2132	0.93	92.67971109	16.085	4 kPa	DMSO
2133	0.94	99.61312638	16.686	4 kPa	DMSO
2134	0.95	104.3233209	17.522	4 kPa	DMSO
2135	0.96	111.4881431	19.228	4 kPa	DMSO
2136	0.97	119.8651909	20.281	4 kPa	DMSO
2137	0.98	122.6364383	20.999	4 kPa	DMSO
2138	0.99	115.498119	17.776	4 kPa	DMSO
2139	1	96.33595465	12.816	4 kPa	DMSO
2299	0.01	26.0887632590357	7.101	4 kPa	GSI
2300	0.02	26.0853208551024	6.662	4 kPa	GSI
2301	0.03	26.3743598713524	6.149	4 kPa	GSI
2302	0.04	26.4708880202719	5.662	4 kPa	GSI
2303	0.05	26.6018893403388	5.226	4 kPa	GSI
2304	0.06	26.7960799905266	4.956	4 kPa	GSI
2305	0.07	26.6160325564914	4.612	4 kPa	GSI
2306	0.08	26.3992697938499	4.398	4 kPa	GSI
2307	0.09	26.078704104445	4.428	4 kPa	GSI
2308	0.1	25.6776984786123	4.309	4 kPa	GSI
2309	0.11	25.5734781837447	4.143	4 kPa	GSI
2310	0.12	25.0221759925176	4.135	4 kPa	GSI
2311	0.13	24.5067100782155	3.954	4 kPa	GSI
2312	0.14	24.0015108722636	3.751	4 kPa	GSI
2313	0.15	24.0377832482485	3.65	4 kPa	GSI
2314	0.16	24.0105847461833	3.483	4 kPa	GSI
2315	0.17	24.1826508847455	3.393	4 kPa	GSI
2316	0.18	24.269313708362	3.55	4 kPa	GSI
2317	0.19	24.8561063244631	3.841	4 kPa	GSI
2318	0.2	25.9765906276133	4.221	4 kPa	GSI
2319	0.21	27.2182549303699	4.475	4 kPa	GSI
2320	0.22	27.7960276260408	4.85	4 kPa	GSI
2321	0.23	28.519299218321	5.146	4 kPa	GSI
2322	0.24	29.2294493916933	5.168	4 kPa	GSI
2323	0.25	30.2297432000201	5.695	4 kPa	GSI
2324	0.26	31.178907710773	5.796	4 kPa	GSI
2325	0.27	31.850987891717	5.872	4 kPa	GSI
2326	0.28	32.331118942835	6.056	4 kPa	GSI
2327	0.29	32.2902828455607	5.475	4 kPa	GSI
2328	0.3	33.0784854730458	5.901	4 kPa	GSI
2329	0.31	33.5099786668494	5.591	4 kPa	GSI
2330	0.32	33.8165349803885	5.389	4 kPa	GSI
2331	0.33	33.8311652384125	5.132	4 kPa	GSI
2332	0.34	33.5208292036655	4.581	4 kPa	GSI
2333	0.35	34.1979447289254	4.863	4 kPa	GSI
2334	0.36	34.0613455776524	4.597	4 kPa	GSI
2335	0.37	33.782358434475	4.214	4 kPa	GSI
2336	0.38	33.4195886779512	3.992	4 kPa	GSI
2337	0.39	32.3215688297976	3.379	4 kPa	GSI
2338	0.4	32.3778052906225	3.55	4 kPa	GSI
2339	0.41	32.113212644719	3.341	4 kPa	GSI
2340	0.42	31.770442909287	3.204	4 kPa	GSI
2341	0.43	31.9934192545846	2.859	4 kPa	GSI
2342	0.44	31.7414533827926	2.616	4 kPa	GSI
2343	0.45	32.5702042854926	2.624	4 kPa	GSI
2344	0.46	33.0153899964114	2.362	4 kPa	GSI
2345	0.47	34.2489308753405	2.512	4 kPa	GSI
2346	0.48	35.1067925636047	2.892	4 kPa	GSI
2347	0.49	35.9974640272472	3.583	4 kPa	GSI
2348	0.5	36.4639006471529	3.56	4 kPa	GSI
2349	0.51	36.4058586230449	3.816	4 kPa	GSI
2350	0.52	37.1721404430336	4.267	4 kPa	GSI
2351	0.53	37.9778644210806	4.793	4 kPa	GSI
2352	0.54	37.9760335866436	4.841	4 kPa	GSI
2353	0.55	38.0631169988749	4.846	4 kPa	GSI
2354	0.56	38.019513013387	4.722	4 kPa	GSI
2355	0.57	38.293073224169	4.809	4 kPa	GSI
2356	0.58	38.5557623322232	4.617	4 kPa	GSI
2357	0.59	38.8694518624211	4.683	4 kPa	GSI
2358	0.6	38.6231793545155	4.419	4 kPa	GSI
2359	0.61	38.3637556000769	4.193	4 kPa	GSI
2360	0.62	37.910429094747	3.895	4 kPa	GSI
2361	0.63	37.1600591774722	3.884	4 kPa	GSI
2362	0.64	37.1614970044209	3.832	4 kPa	GSI
2363	0.65	36.4368453777918	3.783	4 kPa	GSI
2364	0.66	35.7596895348007	3.605	4 kPa	GSI
2365	0.67	35.7630909238397	3.872	4 kPa	GSI
2366	0.68	35.6401803023343	3.989	4 kPa	GSI
2367	0.69	35.9092126094544	3.884	4 kPa	GSI
2368	0.7	36.5204563031481	3.854	4 kPa	GSI
2369	0.71	36.757576539082	3.992	4 kPa	GSI
2370	0.72	37.1988138107555	3.817	4 kPa	GSI
2371	0.73	36.9753995041216	3.362	4 kPa	GSI
2372	0.74	38.0104765070124	3.573	4 kPa	GSI
2373	0.75	39.3199811107916	3.634	4 kPa	GSI
2374	0.76	39.9224519788144	3.557	4 kPa	GSI
2375	0.77	40.1950025284618	3.338	4 kPa	GSI
2376	0.78	40.2786878820616	3.207	4 kPa	GSI
2377	0.79	41.691257588335	4.14	4 kPa	GSI
2378	0.8	42.0656544371121	4.532	4 kPa	GSI
2379	0.81	42.4908749172425	5.235	4 kPa	GSI
2380	0.82	42.4347420271211	5.481	4 kPa	GSI
2381	0.83	42.1730569116555	5.717	4 kPa	GSI
2382	0.84	42.0644107741267	6.357	4 kPa	GSI
2383	0.85	42.4266619155316	6.768	4 kPa	GSI
2384	0.86	42.2325724446403	6.758	4 kPa	GSI
2385	0.87	42.0997113729419	6.848	4 kPa	GSI
2386	0.88	43.078937002556	6.593	4 kPa	GSI
2387	0.89	44.1230029568967	6.776	4 kPa	GSI
2388	0.9	46.3780136404808	6.557	4 kPa	GSI
2389	0.91	49.3478163203603	5.64	4 kPa	GSI
2390	0.92	52.3768391350075	4.344	4 kPa	GSI
2391	0.93	57.4595676105678	4.107	4 kPa	GSI
2392	0.94	66.4664688036527	5.955	4 kPa	GSI
2393	0.95	73.0465835690907	7.686	4 kPa	GSI
2394	0.96	80.5404123531839	10.299	4 kPa	GSI
2395	0.97	81.1654286222603	8.948	4 kPa	GSI
2396	0.98	79.472215669343	4.433	4 kPa	GSI
2397	0.99	76.2295524962088	2.776	4 kPa	GSI
2398	1	78.1504656527523	4.253	4 kPa	GSI
2540	0.01	19.7217371194285	3.205	30 kPa	GSI
2541	0.02	19.5873585211338	3.065	30 kPa	GSI
2542	0.03	19.523363455384	2.936	30 kPa	GSI
2543	0.04	19.6207103621798	2.815	30 kPa	GSI
2544	0.05	19.5140156677768	2.62	30 kPa	GSI
2545	0.06	19.4712658765677	2.533	30 kPa	GSI
2546	0.07	19.3034910129131	2.394	30 kPa	GSI
2547	0.08	19.178161078479	2.267	30 kPa	GSI
2548	0.09	19.1236347874575	2.217	30 kPa	GSI
2549	0.1	18.9893233223504	2.141	30 kPa	GSI
2550	0.11	19.122980548744	2.083	30 kPa	GSI
2551	0.12	18.9950281836106	2.044	30 kPa	GSI
2552	0.13	19.2270344986851	2.001	30 kPa	GSI
2553	0.14	19.2010486325385	1.956	30 kPa	GSI
2554	0.15	19.4272092178561	1.985	30 kPa	GSI
2555	0.16	19.9385529892779	2.037	30 kPa	GSI
2556	0.17	20.2558138459199	2.117	30 kPa	GSI
2557	0.18	20.4447455629032	2.144	30 kPa	GSI
2558	0.19	21.2112564033437	2.334	30 kPa	GSI
2559	0.2	21.7775745853102	2.416	30 kPa	GSI
2560	0.21	22.2656311788161	2.488	30 kPa	GSI
2561	0.22	22.954154967137	2.616	30 kPa	GSI
2562	0.23	23.5105238092975	2.65	30 kPa	GSI
2563	0.24	23.6265673829012	2.593	30 kPa	GSI
2564	0.25	24.3450205224736	2.76	30 kPa	GSI
2565	0.26	24.9317188737926	2.766	30 kPa	GSI
2566	0.27	25.1775087743865	2.769	30 kPa	GSI
2567	0.28	25.5531915283105	2.82	30 kPa	GSI
2568	0.29	26.1132325973712	2.741	30 kPa	GSI
2569	0.3	26.7141486378129	2.909	30 kPa	GSI
2570	0.31	27.2094698986546	2.878	30 kPa	GSI
2571	0.32	28.0083741597806	2.894	30 kPa	GSI
2572	0.33	28.6376843391031	3.024	30 kPa	GSI
2573	0.34	28.8448954599785	2.925	30 kPa	GSI
2574	0.35	29.7671927772792	3.04	30 kPa	GSI
2575	0.36	30.378355547611	3.215	30 kPa	GSI
2576	0.37	30.4226214500291	3.103	30 kPa	GSI
2577	0.38	30.9590999710124	3.135	30 kPa	GSI
2578	0.39	31.1281186569228	3.201	30 kPa	GSI
2579	0.4	31.2592581109616	3.107	30 kPa	GSI
2580	0.41	31.5223557988019	3.125	30 kPa	GSI
2581	0.42	31.5105978830638	3.12	30 kPa	GSI
2582	0.43	31.6791957772527	2.928	30 kPa	GSI
2583	0.44	31.9040571958231	2.903	30 kPa	GSI
2584	0.45	31.9120934882965	2.813	30 kPa	GSI
2585	0.46	32.1860451208832	2.61	30 kPa	GSI
2586	0.47	32.6613039462617	2.449	30 kPa	GSI
2587	0.48	33.0539184582398	2.486	30 kPa	GSI
2588	0.49	33.0818279043041	2.43	30 kPa	GSI
2589	0.5	33.6747347632721	2.261	30 kPa	GSI
2590	0.51	33.4350724547319	2.196	30 kPa	GSI
2591	0.52	33.9641744279787	2.169	30 kPa	GSI
2592	0.53	34.4704779332279	2.21	30 kPa	GSI
2593	0.54	34.5699023277911	2.187	30 kPa	GSI
2594	0.55	35.0807837182601	2.092	30 kPa	GSI
2595	0.56	35.0245679206038	2.032	30 kPa	GSI
2596	0.57	35.616365806363	2.059	30 kPa	GSI
2597	0.58	35.9856725854985	1.969	30 kPa	GSI
2598	0.59	36.4891000955307	1.986	30 kPa	GSI
2599	0.6	36.734199815272	1.858	30 kPa	GSI
2600	0.61	37.058932821534	1.792	30 kPa	GSI
2601	0.62	37.4620951075205	1.775	30 kPa	GSI
2602	0.63	37.6053574932458	1.73	30 kPa	GSI
2603	0.64	37.7689429219393	1.696	30 kPa	GSI
2604	0.65	37.9395711366172	1.678	30 kPa	GSI
2605	0.66	38.0394291133035	1.712	30 kPa	GSI
2606	0.67	38.2899915483907	1.722	30 kPa	GSI
2607	0.68	38.4262934783764	1.787	30 kPa	GSI
2608	0.69	38.6151224536077	1.751	30 kPa	GSI
2609	0.7	39.053309811824	1.71	30 kPa	GSI
2610	0.71	39.0898802621537	1.652	30 kPa	GSI
2611	0.72	38.9243820972555	1.624	30 kPa	GSI
2612	0.73	39.0068717274144	1.475	30 kPa	GSI
2613	0.74	39.5317341996475	1.453	30 kPa	GSI
2614	0.75	39.5525772564025	1.514	30 kPa	GSI
2615	0.76	39.5825900732798	1.484	30 kPa	GSI
2616	0.77	39.8884607700611	1.467	30 kPa	GSI
2617	0.78	39.7941852397027	1.515	30 kPa	GSI
2618	0.79	40.3514156724594	1.736	30 kPa	GSI
2619	0.8	41.0961392100822	1.752	30 kPa	GSI
2620	0.81	41.7435735406009	1.84	30 kPa	GSI
2621	0.82	42.533172834741	1.871	30 kPa	GSI
2622	0.83	44.1810492938351	1.955	30 kPa	GSI
2623	0.84	45.5914555089791	2.292	30 kPa	GSI
2624	0.85	48.0280190457238	2.594	30 kPa	GSI
2625	0.86	50.6487411991715	2.993	30 kPa	GSI
2626	0.87	54.0752926410729	3.642	30 kPa	GSI
2627	0.88	58.7383416935249	4.162	30 kPa	GSI
2628	0.89	64.5187676000937	4.877	30 kPa	GSI
2629	0.9	70.0502393906533	5.792	30 kPa	GSI
2630	0.91	75.9037078509747	6.427	30 kPa	GSI
2631	0.92	82.3191933287401	7.138	30 kPa	GSI
2632	0.93	88.083762960795	7.517	30 kPa	GSI
2633	0.94	93.8808239697815	7.172	30 kPa	GSI
2634	0.95	98.8029065082477	6.955	30 kPa	GSI
2635	0.96	103.302885094575	6.943	30 kPa	GSI
2636	0.97	102.442264340305	6.889	30 kPa	GSI
2637	0.98	100.356481500491	6.107	30 kPa	GSI
2638	0.99	99.0581246829892	6.282	30 kPa	GSI
2639	1	97.2329454841439	6.034	30 kPa	GSI
2781	0.01	17.94881192	4.851	30 kPa	Blebbistatin
2782	0.02	18.0885825	4.983	30 kPa	Blebbistatin
2783	0.03	18.52782117	5.347	30 kPa	Blebbistatin
2784	0.04	18.84014488	5.728	30 kPa	Blebbistatin
2785	0.05	19.26860812	6.122	30 kPa	Blebbistatin
2786	0.06	19.54378345	6.473	30 kPa	Blebbistatin
2787	0.07	19.82097421	6.77	30 kPa	Blebbistatin
2788	0.08	20.09163626	7.149	30 kPa	Blebbistatin
2789	0.09	20.01496884	7.165	30 kPa	Blebbistatin
2790	0.1	20.20570022	7.295	30 kPa	Blebbistatin
2791	0.11	20.29404626	7.304	30 kPa	Blebbistatin
2792	0.12	20.21747519	7.151	30 kPa	Blebbistatin
2793	0.13	20.16657412	6.859	30 kPa	Blebbistatin
2794	0.14	20.32824322	6.704	30 kPa	Blebbistatin
2795	0.15	19.98622609	6.245	30 kPa	Blebbistatin
2796	0.16	20.06252166	5.825	30 kPa	Blebbistatin
2797	0.17	19.91852679	5.333	30 kPa	Blebbistatin
2798	0.18	20.08274256	5.149	30 kPa	Blebbistatin
2799	0.19	20.36933247	4.845	30 kPa	Blebbistatin
2800	0.2	20.39334456	4.433	30 kPa	Blebbistatin
2801	0.21	20.39973115	4.152	30 kPa	Blebbistatin
2802	0.22	20.77569083	4.138	30 kPa	Blebbistatin
2803	0.23	20.97149392	4.053	30 kPa	Blebbistatin
2804	0.24	21.17484682	4.048	30 kPa	Blebbistatin
2805	0.25	21.47911788	4.12	30 kPa	Blebbistatin
2806	0.26	21.83511586	4.195	30 kPa	Blebbistatin
2807	0.27	21.80192233	4.225	30 kPa	Blebbistatin
2808	0.28	21.97171248	4.296	30 kPa	Blebbistatin
2809	0.29	21.79655515	4.272	30 kPa	Blebbistatin
2810	0.3	21.40860077	4.079	30 kPa	Blebbistatin
2811	0.31	21.32753798	4.034	30 kPa	Blebbistatin
2812	0.32	21.00235183	3.895	30 kPa	Blebbistatin
2813	0.33	20.2679753	3.656	30 kPa	Blebbistatin
2814	0.34	19.88150906	3.503	30 kPa	Blebbistatin
2815	0.35	19.69869085	3.352	30 kPa	Blebbistatin
2816	0.36	19.25793042	3.127	30 kPa	Blebbistatin
2817	0.37	19.00188939	2.952	30 kPa	Blebbistatin
2818	0.38	18.98696892	2.907	30 kPa	Blebbistatin
2819	0.39	18.80359319	2.78	30 kPa	Blebbistatin
2820	0.4	18.67848472	2.69	30 kPa	Blebbistatin
2821	0.41	18.86092094	2.727	30 kPa	Blebbistatin
2822	0.42	19.09125215	2.803	30 kPa	Blebbistatin
2823	0.43	19.27363732	2.825	30 kPa	Blebbistatin
2824	0.44	19.6859836	2.909	30 kPa	Blebbistatin
2825	0.45	19.81125592	2.958	30 kPa	Blebbistatin
2826	0.46	20.24879634	3.096	30 kPa	Blebbistatin
2827	0.47	20.27441583	3.098	30 kPa	Blebbistatin
2828	0.48	20.40500143	3.137	30 kPa	Blebbistatin
2829	0.49	20.55746689	3.184	30 kPa	Blebbistatin
2830	0.5	20.80040237	3.243	30 kPa	Blebbistatin
2831	0.51	20.86527642	3.255	30 kPa	Blebbistatin
2832	0.52	21.07246583	3.348	30 kPa	Blebbistatin
2833	0.53	21.24256935	3.354	30 kPa	Blebbistatin
2834	0.54	21.27563034	3.349	30 kPa	Blebbistatin
2835	0.55	21.68293925	3.437	30 kPa	Blebbistatin
2836	0.56	21.88759177	3.465	30 kPa	Blebbistatin
2837	0.57	22.15030084	3.501	30 kPa	Blebbistatin
2838	0.58	22.57349754	3.573	30 kPa	Blebbistatin
2839	0.59	23.03298531	3.682	30 kPa	Blebbistatin
2840	0.6	23.42067249	3.745	30 kPa	Blebbistatin
2841	0.61	23.98979311	3.92	30 kPa	Blebbistatin
2842	0.62	24.11137373	3.901	30 kPa	Blebbistatin
2843	0.63	24.43055629	3.963	30 kPa	Blebbistatin
2844	0.64	24.76681825	4.119	30 kPa	Blebbistatin
2845	0.65	24.75930314	4.059	30 kPa	Blebbistatin
2846	0.66	24.896538	4.036	30 kPa	Blebbistatin
2847	0.67	25.23001178	4.135	30 kPa	Blebbistatin
2848	0.68	25.34146693	4.105	30 kPa	Blebbistatin
2849	0.69	25.40189216	4.001	30 kPa	Blebbistatin
2850	0.7	25.63537735	4.009	30 kPa	Blebbistatin
2851	0.71	25.8528153	4.006	30 kPa	Blebbistatin
2852	0.72	26.04501764	3.965	30 kPa	Blebbistatin
2853	0.73	26.22564787	3.963	30 kPa	Blebbistatin
2854	0.74	26.60932284	4.031	30 kPa	Blebbistatin
2855	0.75	26.74870488	4.015	30 kPa	Blebbistatin
2856	0.76	26.81074215	4.017	30 kPa	Blebbistatin
2857	0.77	27.36517557	4.072	30 kPa	Blebbistatin
2858	0.78	27.56360457	4.097	30 kPa	Blebbistatin
2859	0.79	27.76437393	4.127	30 kPa	Blebbistatin
2860	0.8	27.97959409	4.134	30 kPa	Blebbistatin
2861	0.81	28.30218971	4.151	30 kPa	Blebbistatin
2862	0.82	28.50396774	4.164	30 kPa	Blebbistatin
2863	0.83	28.65746663	4.131	30 kPa	Blebbistatin
2864	0.84	28.97742409	4.108	30 kPa	Blebbistatin
2865	0.85	29.25250151	4.077	30 kPa	Blebbistatin
2866	0.86	29.73421571	4.03	30 kPa	Blebbistatin
2867	0.87	30.53518578	4.088	30 kPa	Blebbistatin
2868	0.88	31.39497061	4.166	30 kPa	Blebbistatin
2869	0.89	32.55471944	4.127	30 kPa	Blebbistatin
2870	0.9	33.98705553	4.299	30 kPa	Blebbistatin
2871	0.91	35.07136162	4.698	30 kPa	Blebbistatin
2872	0.92	36.56990868	5.056	30 kPa	Blebbistatin
2873	0.93	38.29647789	5.127	30 kPa	Blebbistatin
2874	0.94	39.33201402	4.755	30 kPa	Blebbistatin
2875	0.95	40.33082606	4.523	30 kPa	Blebbistatin
2876	0.96	41.15656634	4.689	30 kPa	Blebbistatin
2877	0.97	42.7902409	5.156	30 kPa	Blebbistatin
2878	0.98	41.90971639	5.418	30 kPa	Blebbistatin
2879	0.99	40.44923993	5.591	30 kPa	Blebbistatin
2880	1	35.30149319	5.194	30 kPa	Blebbistatin
3019	0.01	23.51883254	4.934	30 kPa	FR180204
3020	0.02	23.38640833	4.808	30 kPa	FR180204
3021	0.03	23.19186846	4.625	30 kPa	FR180204
3022	0.04	23.17888076	4.508	30 kPa	FR180204
3023	0.05	23.09648407	4.215	30 kPa	FR180204
3024	0.06	22.84838319	3.876	30 kPa	FR180204
3025	0.07	22.6113384	3.537	30 kPa	FR180204
3026	0.08	22.68720093	3.25	30 kPa	FR180204
3027	0.09	22.81691259	3.028	30 kPa	FR180204
3028	0.1	22.92932223	2.793	30 kPa	FR180204
3029	0.11	23.1118352	2.641	30 kPa	FR180204
3030	0.12	23.40180153	2.56	30 kPa	FR180204
3031	0.13	23.93875053	2.51	30 kPa	FR180204
3032	0.14	24.46286966	2.536	30 kPa	FR180204
3033	0.15	24.74943469	2.485	30 kPa	FR180204
3034	0.16	25.41844516	2.517	30 kPa	FR180204
3035	0.17	25.8351275	2.531	30 kPa	FR180204
3036	0.18	26.66931609	2.493	30 kPa	FR180204
3037	0.19	26.89914095	2.448	30 kPa	FR180204
3038	0.2	27.4344064	2.504	30 kPa	FR180204
3039	0.21	28.25489895	2.593	30 kPa	FR180204
3040	0.22	28.82657044	2.519	30 kPa	FR180204
3041	0.23	28.98761469	2.466	30 kPa	FR180204
3042	0.24	29.88521103	2.601	30 kPa	FR180204
3043	0.25	30.75783568	2.703	30 kPa	FR180204
3044	0.26	30.94309673	2.67	30 kPa	FR180204
3045	0.27	31.46658642	2.719	30 kPa	FR180204
3046	0.28	32.08286176	2.8	30 kPa	FR180204
3047	0.29	32.26643978	2.819	30 kPa	FR180204
3048	0.3	32.50247438	2.767	30 kPa	FR180204
3049	0.31	32.91636514	2.803	30 kPa	FR180204
3050	0.32	32.87215318	2.794	30 kPa	FR180204
3051	0.33	32.71584505	2.782	30 kPa	FR180204
3052	0.34	32.83291298	2.745	30 kPa	FR180204
3053	0.35	32.75484942	2.783	30 kPa	FR180204
3054	0.36	32.50060115	2.712	30 kPa	FR180204
3055	0.37	32.25872846	2.711	30 kPa	FR180204
3056	0.38	32.14607859	2.764	30 kPa	FR180204
3057	0.39	32.09254989	2.749	30 kPa	FR180204
3058	0.4	31.98233488	2.72	30 kPa	FR180204
3059	0.41	32.19118827	2.784	30 kPa	FR180204
3060	0.42	32.37763134	2.896	30 kPa	FR180204
3061	0.43	32.2456594	2.762	30 kPa	FR180204
3062	0.44	32.57963429	2.941	30 kPa	FR180204
3063	0.45	33.12432829	3.031	30 kPa	FR180204
3064	0.46	33.54813574	3.076	30 kPa	FR180204
3065	0.47	33.88573065	3.065	30 kPa	FR180204
3066	0.48	34.41371484	3.194	30 kPa	FR180204
3067	0.49	35.04719396	3.438	30 kPa	FR180204
3068	0.5	35.5118837	3.473	30 kPa	FR180204
3069	0.51	35.64896108	3.434	30 kPa	FR180204
3070	0.52	36.54766974	3.654	30 kPa	FR180204
3071	0.53	36.91402444	3.676	30 kPa	FR180204
3072	0.54	37.0352333	3.688	30 kPa	FR180204
3073	0.55	37.55718055	3.693	30 kPa	FR180204
3074	0.56	37.94997454	3.692	30 kPa	FR180204
3075	0.57	38.24163142	3.788	30 kPa	FR180204
3076	0.58	38.46229513	3.746	30 kPa	FR180204
3077	0.59	38.46520416	3.648	30 kPa	FR180204
3078	0.6	39.2238494	3.798	30 kPa	FR180204
3079	0.61	38.93493521	3.602	30 kPa	FR180204
3080	0.62	39.2217736	3.611	30 kPa	FR180204
3081	0.63	39.6815006	3.657	30 kPa	FR180204
3082	0.64	40.08042261	3.64	30 kPa	FR180204
3083	0.65	40.27559315	3.69	30 kPa	FR180204
3084	0.66	40.7061848	3.741	30 kPa	FR180204
3085	0.67	41.67446106	3.921	30 kPa	FR180204
3086	0.68	41.93875788	3.929	30 kPa	FR180204
3087	0.69	42.4564051	4.026	30 kPa	FR180204
3088	0.7	42.826566	4.049	30 kPa	FR180204
3089	0.71	43.90973542	4.214	30 kPa	FR180204
3090	0.72	44.80585409	4.31	30 kPa	FR180204
3091	0.73	45.10604264	4.175	30 kPa	FR180204
3092	0.74	45.69203346	4.102	30 kPa	FR180204
3093	0.75	46.47739119	4.129	30 kPa	FR180204
3094	0.76	47.18910667	3.948	30 kPa	FR180204
3095	0.77	47.83179928	3.934	30 kPa	FR180204
3096	0.78	48.38576543	3.988	30 kPa	FR180204
3097	0.79	49.49410008	4.092	30 kPa	FR180204
3098	0.8	51.47010367	4.535	30 kPa	FR180204
3099	0.81	53.69773642	4.805	30 kPa	FR180204
3100	0.82	56.11303601	5.215	30 kPa	FR180204
3101	0.83	59.84238937	5.533	30 kPa	FR180204
3102	0.84	64.20561805	5.93	30 kPa	FR180204
3103	0.85	71.58083717	6.662	30 kPa	FR180204
3104	0.86	78.73699051	7.055	30 kPa	FR180204
3105	0.87	87.65261503	7.777	30 kPa	FR180204
3106	0.88	98.3096556	8.793	30 kPa	FR180204
3107	0.89	110.0948408	9.649	30 kPa	FR180204
3108	0.9	123.6412485	10.823	30 kPa	FR180204
3109	0.91	137.8407914	12.798	30 kPa	FR180204
3110	0.92	154.7842971	14.983	30 kPa	FR180204
3111	0.93	171.9449191	16.461	30 kPa	FR180204
3112	0.94	192.4641366	18.333	30 kPa	FR180204
3113	0.95	209.0885655	20.192	30 kPa	FR180204
3114	0.96	219.729834	21.886	30 kPa	FR180204
3115	0.97	234.1902166	26.863	30 kPa	FR180204
3116	0.98	233.0199668	27.326	30 kPa	FR180204
3117	0.99	213.9569963	26.207	30 kPa	FR180204
3118	1	188.6713086	24.238	30 kPa	FR180204
3286	0.01	31.463719006165	6.412	30 kPa	Y-27632
3287	0.02	33.2910168560128	6.134	30 kPa	Y-27632
3288	0.03	35.7618824742793	5.924	30 kPa	Y-27632
3289	0.04	38.4273140093045	5.798	30 kPa	Y-27632
3290	0.05	40.421814585099	5.734	30 kPa	Y-27632
3291	0.06	42.3974597299639	5.755	30 kPa	Y-27632
3292	0.07	44.1617258282979	5.743	30 kPa	Y-27632
3293	0.08	45.5665865148232	5.855	30 kPa	Y-27632
3294	0.09	46.7962792379471	5.974	30 kPa	Y-27632
3295	0.1	47.5811937454029	6.01	30 kPa	Y-27632
3296	0.11	48.0019991494163	6.011	30 kPa	Y-27632
3297	0.12	47.9933947812832	5.964	30 kPa	Y-27632
3298	0.13	47.6800627587191	5.795	30 kPa	Y-27632
3299	0.14	47.059195253033	5.702	30 kPa	Y-27632
3300	0.15	46.4600860026537	5.599	30 kPa	Y-27632
3301	0.16	45.6913375884738	5.364	30 kPa	Y-27632
3302	0.17	44.5825282493604	5.091	30 kPa	Y-27632
3303	0.18	43.9356766351569	4.822	30 kPa	Y-27632
3304	0.19	43.6105904167634	4.517	30 kPa	Y-27632
3305	0.2	43.4033565337014	4.357	30 kPa	Y-27632
3306	0.21	43.4429856662788	4.179	30 kPa	Y-27632
3307	0.22	43.8164847465032	4.095	30 kPa	Y-27632
3308	0.23	43.7575299497483	3.902	30 kPa	Y-27632
3309	0.24	43.9800916645012	3.844	30 kPa	Y-27632
3310	0.25	43.9274714543105	3.826	30 kPa	Y-27632
3311	0.26	43.5511880522219	3.737	30 kPa	Y-27632
3312	0.27	43.2859907339355	3.771	30 kPa	Y-27632
3313	0.28	42.1732397845192	3.666	30 kPa	Y-27632
3314	0.29	41.5319302754293	3.676	30 kPa	Y-27632
3315	0.3	40.4186025200799	3.646	30 kPa	Y-27632
3316	0.31	39.315912048799	3.688	30 kPa	Y-27632
3317	0.32	38.3071056897552	3.773	30 kPa	Y-27632
3318	0.33	36.9995887261909	3.732	30 kPa	Y-27632
3319	0.34	36.1148970966404	3.794	30 kPa	Y-27632
3320	0.35	35.0198395554081	3.584	30 kPa	Y-27632
3321	0.36	34.1955761189334	3.646	30 kPa	Y-27632
3322	0.37	34.0660160117356	3.888	30 kPa	Y-27632
3323	0.38	33.0734716094693	3.653	30 kPa	Y-27632
3324	0.39	32.6239312856194	3.608	30 kPa	Y-27632
3325	0.4	32.51023408395	3.696	30 kPa	Y-27632
3326	0.41	31.8060286512581	3.618	30 kPa	Y-27632
3327	0.42	31.5990154882225	3.762	30 kPa	Y-27632
3328	0.43	31.0043628095859	3.567	30 kPa	Y-27632
3329	0.44	31.0567006453307	3.624	30 kPa	Y-27632
3330	0.45	30.7008650482038	3.512	30 kPa	Y-27632
3331	0.46	30.6396871818467	3.562	30 kPa	Y-27632
3332	0.47	30.3561396404964	3.553	30 kPa	Y-27632
3333	0.48	30.1220658636738	3.526	30 kPa	Y-27632
3334	0.49	30.1604228616294	3.516	30 kPa	Y-27632
3335	0.5	30.4693733414726	3.593	30 kPa	Y-27632
3336	0.51	30.4535842374951	3.663	30 kPa	Y-27632
3337	0.52	30.6169722980539	3.76	30 kPa	Y-27632
3338	0.53	30.9770218636644	3.846	30 kPa	Y-27632
3339	0.54	31.1427213873953	3.893	30 kPa	Y-27632
3340	0.55	31.2908302100713	3.925	30 kPa	Y-27632
3341	0.56	31.7247051004874	4.041	30 kPa	Y-27632
3342	0.57	31.7361138448214	3.95	30 kPa	Y-27632
3343	0.58	31.9645631663786	3.913	30 kPa	Y-27632
3344	0.59	32.0906622889666	3.88	30 kPa	Y-27632
3345	0.6	32.2859773460455	3.85	30 kPa	Y-27632
3346	0.61	32.6751795047138	3.861	30 kPa	Y-27632
3347	0.62	32.5289483622857	3.766	30 kPa	Y-27632
3348	0.63	32.7108732735533	3.709	30 kPa	Y-27632
3349	0.64	32.9230514268017	3.651	30 kPa	Y-27632
3350	0.65	33.3385360596816	3.631	30 kPa	Y-27632
3351	0.66	33.9014086711443	3.571	30 kPa	Y-27632
3352	0.67	34.0501774820028	3.452	30 kPa	Y-27632
3353	0.68	34.3775807669202	3.335	30 kPa	Y-27632
3354	0.69	34.8533522816338	3.263	30 kPa	Y-27632
3355	0.7	35.4032741787642	3.246	30 kPa	Y-27632
3356	0.71	36.0634467248856	3.246	30 kPa	Y-27632
3357	0.72	36.5162060401768	3.138	30 kPa	Y-27632
3358	0.73	36.980105647152	3.124	30 kPa	Y-27632
3359	0.74	37.4382631109729	3.088	30 kPa	Y-27632
3360	0.75	37.9897728687734	3.119	30 kPa	Y-27632
3361	0.76	38.5431069566756	3.079	30 kPa	Y-27632
3362	0.77	38.8003958801152	3.092	30 kPa	Y-27632
3363	0.78	38.957298910275	3.145	30 kPa	Y-27632
3364	0.79	38.8778067103842	3.181	30 kPa	Y-27632
3365	0.8	38.7529256305896	3.147	30 kPa	Y-27632
3366	0.81	38.6598726687765	3.177	30 kPa	Y-27632
3367	0.82	38.2204704863811	3.267	30 kPa	Y-27632
3368	0.83	37.7707254395509	3.361	30 kPa	Y-27632
3369	0.84	37.3226998205887	3.408	30 kPa	Y-27632
3370	0.85	36.7891950584604	3.468	30 kPa	Y-27632
3371	0.86	36.2698327938242	3.643	30 kPa	Y-27632
3372	0.87	36.0589787409964	3.758	30 kPa	Y-27632
3373	0.88	36.2559106496324	3.84	30 kPa	Y-27632
3374	0.89	37.2978847775768	4.075	30 kPa	Y-27632
3375	0.9	38.171156737056	4.214	30 kPa	Y-27632
3376	0.91	40.2155455898297	4.465	30 kPa	Y-27632
3377	0.92	42.125695437684	4.516	30 kPa	Y-27632
3378	0.93	45.2039917336912	4.854	30 kPa	Y-27632
3379	0.94	49.2184264863301	5.314	30 kPa	Y-27632
3380	0.95	54.5427343736569	5.913	30 kPa	Y-27632
3381	0.96	59.6674671251506	6.466	30 kPa	Y-27632
3382	0.97	65.0586699240914	7.433	30 kPa	Y-27632
3383	0.98	68.7118768452679	8.731	30 kPa	Y-27632
3384	0.99	64.5542735240727	8.731	30 kPa	Y-27632
3385	1	54.195389623582	8.122	30 kPa	Y-27632
3522	0.01	36.3859883183119	4.592	30 kPa	SB-431542
3523	0.02	36.4682121349204	4.474	30 kPa	SB-431542
3524	0.03	36.8838569687445	4.256	30 kPa	SB-431542
3525	0.04	37.2470447505898	4.136	30 kPa	SB-431542
3526	0.05	37.4807822879156	4.111	30 kPa	SB-431542
3527	0.06	37.6991438164421	4.229	30 kPa	SB-431542
3528	0.07	38.3579915553633	4.407	30 kPa	SB-431542
3529	0.08	38.6758532482194	4.551	30 kPa	SB-431542
3530	0.09	38.9942956799999	4.657	30 kPa	SB-431542
3531	0.1	39.2464300057871	4.647	30 kPa	SB-431542
3532	0.11	39.4704423455474	4.704	30 kPa	SB-431542
3533	0.12	39.5396014251468	4.727	30 kPa	SB-431542
3534	0.13	39.6325930170063	4.73	30 kPa	SB-431542
3535	0.14	39.6624405774364	4.684	30 kPa	SB-431542
3536	0.15	39.7028169632484	4.691	30 kPa	SB-431542
3537	0.16	39.7141155298167	4.497	30 kPa	SB-431542
3538	0.17	40.0495255259373	4.464	30 kPa	SB-431542
3539	0.18	40.7057191518442	4.26	30 kPa	SB-431542
3540	0.19	40.693445514426	4.139	30 kPa	SB-431542
3541	0.2	41.0047131960109	3.811	30 kPa	SB-431542
3542	0.21	41.2077194523576	3.58	30 kPa	SB-431542
3543	0.22	41.8430069552835	3.338	30 kPa	SB-431542
3544	0.23	41.8705204760409	3.141	30 kPa	SB-431542
3545	0.24	42.133884567358	3.115	30 kPa	SB-431542
3546	0.25	42.1435583250035	3.008	30 kPa	SB-431542
3547	0.26	42.2330445242495	2.953	30 kPa	SB-431542
3548	0.27	42.322623918578	3.04	30 kPa	SB-431542
3549	0.28	42.5757120687873	3.203	30 kPa	SB-431542
3550	0.29	42.5512387169539	3.1	30 kPa	SB-431542
3551	0.3	42.9114711550719	3.203	30 kPa	SB-431542
3552	0.31	43.2434927351393	3.334	30 kPa	SB-431542
3553	0.32	43.849353469307	3.38	30 kPa	SB-431542
3554	0.33	44.2617071070137	3.491	30 kPa	SB-431542
3555	0.34	44.3959362651042	3.446	30 kPa	SB-431542
3556	0.35	44.6474598694352	3.497	30 kPa	SB-431542
3557	0.36	44.4792083761279	3.573	30 kPa	SB-431542
3558	0.37	44.3893967420915	3.574	30 kPa	SB-431542
3559	0.38	44.0119527991354	3.576	30 kPa	SB-431542
3560	0.39	43.5503972811006	3.543	30 kPa	SB-431542
3561	0.4	42.9776228440814	3.391	30 kPa	SB-431542
3562	0.41	42.3544354414948	3.357	30 kPa	SB-431542
3563	0.42	41.7259226989917	3.234	30 kPa	SB-431542
3564	0.43	41.0975776582824	3.193	30 kPa	SB-431542
3565	0.44	40.5987871559731	3.069	30 kPa	SB-431542
3566	0.45	40.3100093350242	3.014	30 kPa	SB-431542
3567	0.46	39.9902261177192	2.88	30 kPa	SB-431542
3568	0.47	39.7815074785127	2.817	30 kPa	SB-431542
3569	0.48	39.5364801216955	2.767	30 kPa	SB-431542
3570	0.49	39.6080543655589	2.719	30 kPa	SB-431542
3571	0.5	39.6247110444972	2.748	30 kPa	SB-431542
3572	0.51	39.7812027526836	2.715	30 kPa	SB-431542
3573	0.52	39.9485166571272	2.677	30 kPa	SB-431542
3574	0.53	39.9599776032297	2.705	30 kPa	SB-431542
3575	0.54	40.15661945237	2.719	30 kPa	SB-431542
3576	0.55	39.9143833280488	2.755	30 kPa	SB-431542
3577	0.56	39.756061841947	2.65	30 kPa	SB-431542
3578	0.57	39.8136051498519	2.518	30 kPa	SB-431542
3579	0.58	39.645461625343	2.442	30 kPa	SB-431542
3580	0.59	39.8045501699917	2.465	30 kPa	SB-431542
3581	0.6	40.3089127394905	2.509	30 kPa	SB-431542
3582	0.61	40.6704431370777	2.496	30 kPa	SB-431542
3583	0.62	41.4946501090609	2.515	30 kPa	SB-431542
3584	0.63	42.4379339050826	2.602	30 kPa	SB-431542
3585	0.64	43.0751612946655	2.725	30 kPa	SB-431542
3586	0.65	44.017056144424	2.864	30 kPa	SB-431542
3587	0.66	45.0910249219589	2.976	30 kPa	SB-431542
3588	0.67	46.4618146506461	3.076	30 kPa	SB-431542
3589	0.68	47.6389146291428	3.183	30 kPa	SB-431542
3590	0.69	49.1023237926708	3.381	30 kPa	SB-431542
3591	0.7	50.3520942614515	3.604	30 kPa	SB-431542
3592	0.71	51.5505716807662	3.683	30 kPa	SB-431542
3593	0.72	52.920747529719	3.86	30 kPa	SB-431542
3594	0.73	53.9894449244882	4.048	30 kPa	SB-431542
3595	0.74	55.3905366151005	4.184	30 kPa	SB-431542
3596	0.75	56.3375058450146	4.208	30 kPa	SB-431542
3597	0.76	57.0252364137588	4.201	30 kPa	SB-431542
3598	0.77	58.1097640847938	4.183	30 kPa	SB-431542
3599	0.78	57.8336122350111	4.167	30 kPa	SB-431542
3600	0.79	57.9094380122881	4.059	30 kPa	SB-431542
3601	0.8	57.6460434581002	3.82	30 kPa	SB-431542
3602	0.81	56.6258485614045	3.567	30 kPa	SB-431542
3603	0.82	56.1213554443035	3.436	30 kPa	SB-431542
3604	0.83	54.6915342193738	3.088	30 kPa	SB-431542
3605	0.84	53.025557448181	2.772	30 kPa	SB-431542
3606	0.85	51.204069457134	2.545	30 kPa	SB-431542
3607	0.86	50.4479939178374	2.306	30 kPa	SB-431542
3608	0.87	49.3922623485253	2.271	30 kPa	SB-431542
3609	0.88	49.080468988723	2.38	30 kPa	SB-431542
3610	0.89	49.4911475281999	2.743	30 kPa	SB-431542
3611	0.9	50.6173641229441	3.104	30 kPa	SB-431542
3612	0.91	53.3116695209912	3.493	30 kPa	SB-431542
3613	0.92	56.9712602056699	3.893	30 kPa	SB-431542
3614	0.93	61.3487166178896	4.59	30 kPa	SB-431542
3615	0.94	66.228388968857	5.17	30 kPa	SB-431542
3616	0.95	72.979061054723	6.144	30 kPa	SB-431542
3617	0.96	80.578954783355	7.407	30 kPa	SB-431542
3618	0.97	85.8906582738252	7.553	30 kPa	SB-431542
3619	0.98	86.8264855868248	7.372	30 kPa	SB-431542
3620	0.99	83.1950115309977	7.861	30 kPa	SB-431542
3621	1	75.5848754880291	7.121	30 kPa	SB-431542
3757	0.01	31.8440796716294	5.776	30 kPa	SB-431542
3758	0.02	31.6987548266007	5.607	30 kPa	SB-431542
3759	0.03	31.6293916323289	5.316	30 kPa	SB-431542
3760	0.04	31.5700226441119	4.998	30 kPa	SB-431542
3761	0.05	31.9302454592979	4.696	30 kPa	SB-431542
3762	0.06	32.5138973789091	4.576	30 kPa	SB-431542
3763	0.07	33.2116875220246	4.429	30 kPa	SB-431542
3764	0.08	33.9085899035799	4.316	30 kPa	SB-431542
3765	0.09	34.3473285412021	4.129	30 kPa	SB-431542
3766	0.1	34.9207409751585	4.155	30 kPa	SB-431542
3767	0.11	34.6135813201918	3.835	30 kPa	SB-431542
3768	0.12	35.7985067734831	4.452	30 kPa	SB-431542
3769	0.13	36.1854911816003	4.575	30 kPa	SB-431542
3770	0.14	36.9558317654246	4.459	30 kPa	SB-431542
3771	0.15	37.1018090657973	4.127	30 kPa	SB-431542
3772	0.16	37.0221159739677	3.91	30 kPa	SB-431542
3773	0.17	37.1030292779845	3.501	30 kPa	SB-431542
3774	0.18	38.0315866539491	3.808	30 kPa	SB-431542
3775	0.19	38.4901337723438	3.647	30 kPa	SB-431542
3776	0.2	39.0704323464776	3.591	30 kPa	SB-431542
3777	0.21	39.5271970000456	3.497	30 kPa	SB-431542
3778	0.22	39.7047214410436	3.337	30 kPa	SB-431542
3779	0.23	40.0183343853328	3.19	30 kPa	SB-431542
3780	0.24	40.4321999162553	3.159	30 kPa	SB-431542
3781	0.25	40.9612663008701	2.975	30 kPa	SB-431542
3782	0.26	41.5522234748475	3.027	30 kPa	SB-431542
3783	0.27	42.1563146733194	3.13	30 kPa	SB-431542
3784	0.28	42.3066272956637	3.025	30 kPa	SB-431542
3785	0.29	43.1584290068449	3.117	30 kPa	SB-431542
3786	0.3	43.4434767417695	3.156	30 kPa	SB-431542
3787	0.31	44.1735508966346	3.204	30 kPa	SB-431542
3788	0.32	44.5245685656127	3.167	30 kPa	SB-431542
3789	0.33	44.9987007485299	3.095	30 kPa	SB-431542
3790	0.34	44.9491332665439	2.908	30 kPa	SB-431542
3791	0.35	45.4196036544812	2.876	30 kPa	SB-431542
3792	0.36	45.8332878250587	2.753	30 kPa	SB-431542
3793	0.37	46.8494422307285	2.761	30 kPa	SB-431542
3794	0.38	47.4640463307218	2.811	30 kPa	SB-431542
3795	0.39	48.6984339364641	2.941	30 kPa	SB-431542
3796	0.4	49.1275577370709	2.987	30 kPa	SB-431542
3797	0.41	50.3893467904232	3.393	30 kPa	SB-431542
3798	0.42	51.3345500971713	3.629	30 kPa	SB-431542
3799	0.43	52.1366381427546	3.781	30 kPa	SB-431542
3800	0.44	53.1687037775922	4.21	30 kPa	SB-431542
3801	0.45	53.5761076545544	4.311	30 kPa	SB-431542
3802	0.46	54.0086971981438	4.469	30 kPa	SB-431542
3803	0.47	53.8877089055944	4.491	30 kPa	SB-431542
3804	0.48	54.3590240023099	4.451	30 kPa	SB-431542
3805	0.49	54.8771558218986	4.589	30 kPa	SB-431542
3806	0.5	54.7989691238584	4.366	30 kPa	SB-431542
3807	0.51	54.8536216334596	4.357	30 kPa	SB-431542
3808	0.52	54.6576534480901	4.086	30 kPa	SB-431542
3809	0.53	53.936759724906	3.622	30 kPa	SB-431542
3810	0.54	53.8938108946661	3.65	30 kPa	SB-431542
3811	0.55	54.1213498159382	3.568	30 kPa	SB-431542
3812	0.56	53.5249106976424	3.395	30 kPa	SB-431542
3813	0.57	53.554759292671	3.335	30 kPa	SB-431542
3814	0.58	53.4470519717	3.354	30 kPa	SB-431542
3815	0.59	53.2714070142051	3.365	30 kPa	SB-431542
3816	0.6	53.1314948141421	3.295	30 kPa	SB-431542
3817	0.61	53.0454772450275	3.24	30 kPa	SB-431542
3818	0.62	52.8831720552001	3.032	30 kPa	SB-431542
3819	0.63	53.0871621933086	3.088	30 kPa	SB-431542
3820	0.64	53.7458059836307	3.178	30 kPa	SB-431542
3821	0.65	54.5646553284703	3.086	30 kPa	SB-431542
3822	0.66	55.8626970413572	3.298	30 kPa	SB-431542
3823	0.67	56.8831579899205	3.136	30 kPa	SB-431542
3824	0.68	58.2104725001777	3.149	30 kPa	SB-431542
3825	0.69	59.9305516291101	3.207	30 kPa	SB-431542
3826	0.7	61.7848259845608	3.165	30 kPa	SB-431542
3827	0.71	63.7816653011238	3.176	30 kPa	SB-431542
3828	0.72	65.1950639703503	3.079	30 kPa	SB-431542
3829	0.73	66.9326481711813	3.073	30 kPa	SB-431542
3830	0.74	68.7175023437453	3.124	30 kPa	SB-431542
3831	0.75	70.2097144088311	3.248	30 kPa	SB-431542
3832	0.76	71.5026126798011	3.314	30 kPa	SB-431542
3833	0.77	72.804162754294	3.467	30 kPa	SB-431542
3834	0.78	73.3260746181293	3.442	30 kPa	SB-431542
3835	0.79	74.2453455648526	3.797	30 kPa	SB-431542
3836	0.8	74.3092729147096	4.058	30 kPa	SB-431542
3837	0.81	73.57302144468	4.299	30 kPa	SB-431542
3838	0.82	73.1357534744313	4.665	30 kPa	SB-431542
3839	0.83	71.7921673165075	4.896	30 kPa	SB-431542
3840	0.84	70.6253776862326	5.348	30 kPa	SB-431542
3841	0.85	69.2808904573302	5.899	30 kPa	SB-431542
3842	0.86	67.3434297706501	6.061	30 kPa	SB-431542
3843	0.87	65.9353316654143	6.197	30 kPa	SB-431542
3844	0.88	64.7460396185956	6.404	30 kPa	SB-431542
3845	0.89	62.7116346802819	6.428	30 kPa	SB-431542
3846	0.9	61.890551107502	6.548	30 kPa	SB-431542
3847	0.91	62.7280048148261	6.723	30 kPa	SB-431542
3848	0.92	63.5196585599415	6.732	30 kPa	SB-431542
3849	0.93	66.4993097298394	6.952	30 kPa	SB-431542
3850	0.94	71.1017210486328	7.354	30 kPa	SB-431542
3851	0.95	76.6575235662805	7.634	30 kPa	SB-431542
3852	0.96	80.8076370879636	6.867	30 kPa	SB-431542
3853	0.97	82.5193079516803	6.58	30 kPa	SB-431542
3854	0.98	82.0283082157732	6.872	30 kPa	SB-431542
3855	0.99	76.3826010796729	6.515	30 kPa	SB-431542
3856	1	71.7455669083573	6.816	30 kPa	SB-431542
3993	0.01	30.5318524933453	3.676	30 kPa	DECMA
3994	0.02	30.5436308946308	3.478	30 kPa	DECMA
3995	0.03	30.6155485691759	3.259	30 kPa	DECMA
3996	0.04	30.6693674010333	3.012	30 kPa	DECMA
3997	0.05	30.9231425797909	2.809	30 kPa	DECMA
3998	0.06	31.24847983723	2.664	30 kPa	DECMA
3999	0.07	31.928100849637	2.567	30 kPa	DECMA
4000	0.08	32.2421962703949	2.466	30 kPa	DECMA
4001	0.09	32.7164733730993	2.444	30 kPa	DECMA
4002	0.1	33.2793282639329	2.505	30 kPa	DECMA
4003	0.11	33.7356008559696	2.525	30 kPa	DECMA
4004	0.12	34.0308759570835	2.517	30 kPa	DECMA
4005	0.13	34.2173270931819	2.594	30 kPa	DECMA
4006	0.14	34.409685411649	2.764	30 kPa	DECMA
4007	0.15	34.3900336764984	2.804	30 kPa	DECMA
4008	0.16	34.62466655949	2.799	30 kPa	DECMA
4009	0.17	34.6445515750903	2.808	30 kPa	DECMA
4010	0.18	34.7462726135466	2.819	30 kPa	DECMA
4011	0.19	34.9029928175104	2.823	30 kPa	DECMA
4012	0.2	35.1039671571799	2.754	30 kPa	DECMA
4013	0.21	35.5333061554255	2.642	30 kPa	DECMA
4014	0.22	35.4369685103955	2.465	30 kPa	DECMA
4015	0.23	35.3319653782889	2.28	30 kPa	DECMA
4016	0.24	35.150588750958	2.175	30 kPa	DECMA
4017	0.25	35.1647112037504	2.112	30 kPa	DECMA
4018	0.26	34.8646911242204	1.982	30 kPa	DECMA
4019	0.27	34.6395689054527	1.838	30 kPa	DECMA
4020	0.28	34.4716056012338	1.7	30 kPa	DECMA
4021	0.29	34.3082012283451	1.591	30 kPa	DECMA
4022	0.3	34.2673933188159	1.52	30 kPa	DECMA
4023	0.31	34.1595439556973	1.508	30 kPa	DECMA
4024	0.32	34.3485870647864	1.555	30 kPa	DECMA
4025	0.33	34.533495473113	1.605	30 kPa	DECMA
4026	0.34	34.6238439039024	1.62	30 kPa	DECMA
4027	0.35	34.9734232391239	1.727	30 kPa	DECMA
4028	0.36	35.0754844953786	1.751	30 kPa	DECMA
4029	0.37	34.9624371102633	1.926	30 kPa	DECMA
4030	0.38	35.2945630359435	1.994	30 kPa	DECMA
4031	0.39	35.1473724211076	1.961	30 kPa	DECMA
4032	0.4	35.2885536093522	2.01	30 kPa	DECMA
4033	0.41	35.3957235902934	2.083	30 kPa	DECMA
4034	0.42	35.461193202257	2.185	30 kPa	DECMA
4035	0.43	35.4183494123476	2.194	30 kPa	DECMA
4036	0.44	35.6512105947528	2.27	30 kPa	DECMA
4037	0.45	35.8151493638618	2.32	30 kPa	DECMA
4038	0.46	35.8829794616052	2.445	30 kPa	DECMA
4039	0.47	36.2421358133167	2.613	30 kPa	DECMA
4040	0.48	36.4202161470923	2.697	30 kPa	DECMA
4041	0.49	36.7983619956717	2.737	30 kPa	DECMA
4042	0.5	37.2747948377774	2.857	30 kPa	DECMA
4043	0.51	37.6476940686245	2.965	30 kPa	DECMA
4044	0.52	37.9031934074135	2.993	30 kPa	DECMA
4045	0.53	38.2893902261124	3.023	30 kPa	DECMA
4046	0.54	38.7656488679528	3.095	30 kPa	DECMA
4047	0.55	39.1498058999159	3.166	30 kPa	DECMA
4048	0.56	39.444411448176	3.04	30 kPa	DECMA
4049	0.57	39.8217594923983	3.052	30 kPa	DECMA
4050	0.58	40.0555097224643	3.033	30 kPa	DECMA
4051	0.59	40.4779035229914	3.168	30 kPa	DECMA
4052	0.6	40.5536913478277	3.037	30 kPa	DECMA
4053	0.61	40.6081525722879	2.956	30 kPa	DECMA
4054	0.62	40.9815311451234	2.979	30 kPa	DECMA
4055	0.63	41.439771078191	3.118	30 kPa	DECMA
4056	0.64	41.5908122668865	3.036	30 kPa	DECMA
4057	0.65	41.8922563107729	3.084	30 kPa	DECMA
4058	0.66	42.3599720669153	3.013	30 kPa	DECMA
4059	0.67	43.0519386633789	3.187	30 kPa	DECMA
4060	0.68	43.1812039893319	3.118	30 kPa	DECMA
4061	0.69	43.6705541197726	3.13	30 kPa	DECMA
4062	0.7	44.4324920590586	3.075	30 kPa	DECMA
4063	0.71	45.211176463144	3.101	30 kPa	DECMA
4064	0.72	46.1151567349752	3.214	30 kPa	DECMA
4065	0.73	46.6953233055399	3.163	30 kPa	DECMA
4066	0.74	47.509233874515	3.235	30 kPa	DECMA
4067	0.75	48.5149557556524	3.274	30 kPa	DECMA
4068	0.76	49.904970378482	3.476	30 kPa	DECMA
4069	0.77	50.5937304466251	3.605	30 kPa	DECMA
4070	0.78	50.9895841899551	3.564	30 kPa	DECMA
4071	0.79	51.7121390984688	3.745	30 kPa	DECMA
4072	0.8	52.3298930702381	3.819	30 kPa	DECMA
4073	0.81	52.9601997586695	3.956	30 kPa	DECMA
4074	0.82	53.3717244621761	4.005	30 kPa	DECMA
4075	0.83	54.3900933311241	4.311	30 kPa	DECMA
4076	0.84	55.9967985066387	4.707	30 kPa	DECMA
4077	0.85	58.3325510261999	5.211	30 kPa	DECMA
4078	0.86	61.3483540250163	5.762	30 kPa	DECMA
4079	0.87	66.0622465845634	6.553	30 kPa	DECMA
4080	0.88	71.5089593946559	7.35	30 kPa	DECMA
4081	0.89	79.1781023522641	8.517	30 kPa	DECMA
4082	0.9	87.0350390278669	9.578	30 kPa	DECMA
4083	0.91	97.3398246015361	10.782	30 kPa	DECMA
4084	0.92	107.50224901242	12.044	30 kPa	DECMA
4085	0.93	119.601709582558	13.46	30 kPa	DECMA
4086	0.94	132.994140885385	14.755	30 kPa	DECMA
4087	0.95	145.891671564431	15.452	30 kPa	DECMA
4088	0.96	156.191998038723	16.218	30 kPa	DECMA
4089	0.97	164.344265892366	18.008	30 kPa	DECMA
4090	0.98	162.75073679101	18.92	30 kPa	DECMA
4091	0.99	156.015412468748	18.867	30 kPa	DECMA
4092	1	136.503916716572	16.876	30 kPa	DECMA
4239	0.01	34.4458574373356	4.898	30 kPa	DECMA
4240	0.02	34.3398114298325	4.736	30 kPa	DECMA
4241	0.03	34.6155598504595	4.46	30 kPa	DECMA
4242	0.04	34.7936056419535	4.221	30 kPa	DECMA
4243	0.05	34.6816020861009	4.024	30 kPa	DECMA
4244	0.06	34.7861077061505	3.847	30 kPa	DECMA
4245	0.07	35.0459732605844	3.812	30 kPa	DECMA
4246	0.08	35.5625664050843	3.858	30 kPa	DECMA
4247	0.09	35.9334400426662	3.888	30 kPa	DECMA
4248	0.1	36.3956097056124	3.936	30 kPa	DECMA
4249	0.11	36.5523061550679	3.895	30 kPa	DECMA
4250	0.12	37.134294761987	3.888	30 kPa	DECMA
4251	0.13	37.4667341565283	3.862	30 kPa	DECMA
4252	0.14	37.3865162219256	3.708	30 kPa	DECMA
4253	0.15	37.3491841321624	3.55	30 kPa	DECMA
4254	0.16	37.2918741364684	3.338	30 kPa	DECMA
4255	0.17	37.6090369344762	3.15	30 kPa	DECMA
4256	0.18	37.7555818488038	3.024	30 kPa	DECMA
4257	0.19	38.2398951584785	2.957	30 kPa	DECMA
4258	0.2	38.2625290758995	2.871	30 kPa	DECMA
4259	0.21	39.2570766746463	2.94	30 kPa	DECMA
4260	0.22	39.7846846067207	3.031	30 kPa	DECMA
4261	0.23	40.6241648834042	3.176	30 kPa	DECMA
4262	0.24	41.5516634588873	3.36	30 kPa	DECMA
4263	0.25	42.4019643325479	3.509	30 kPa	DECMA
4264	0.26	43.1845858135798	3.676	30 kPa	DECMA
4265	0.27	44.142829629697	3.745	30 kPa	DECMA
4266	0.28	45.3489869792246	3.914	30 kPa	DECMA
4267	0.29	45.645232313155	3.995	30 kPa	DECMA
4268	0.3	46.6560378750454	4.045	30 kPa	DECMA
4269	0.31	47.283482874175	4.121	30 kPa	DECMA
4270	0.32	47.8099248225541	4.195	30 kPa	DECMA
4271	0.33	48.0466949294885	4.246	30 kPa	DECMA
4272	0.34	48.473309324853	4.232	30 kPa	DECMA
4273	0.35	48.2111551054467	4.278	30 kPa	DECMA
4274	0.36	48.6862130701515	4.278	30 kPa	DECMA
4275	0.37	48.6114241853184	4.214	30 kPa	DECMA
4276	0.38	48.531112315236	4.122	30 kPa	DECMA
4277	0.39	48.1196787530047	4.114	30 kPa	DECMA
4278	0.4	47.738321517449	4.118	30 kPa	DECMA
4279	0.41	47.2205418602516	4.081	30 kPa	DECMA
4280	0.42	47.2990890283813	3.986	30 kPa	DECMA
4281	0.43	47.4729016346696	3.939	30 kPa	DECMA
4282	0.44	47.4724944073724	3.915	30 kPa	DECMA
4283	0.45	47.4237786923808	3.821	30 kPa	DECMA
4284	0.46	47.0843679586336	3.741	30 kPa	DECMA
4285	0.47	47.1598356311007	3.614	30 kPa	DECMA
4286	0.48	46.9428801036137	3.575	30 kPa	DECMA
4287	0.49	46.7563061736234	3.514	30 kPa	DECMA
4288	0.5	46.2727111147001	3.361	30 kPa	DECMA
4289	0.51	46.0075126470935	3.248	30 kPa	DECMA
4290	0.52	45.7510599007172	3.094	30 kPa	DECMA
4291	0.53	44.953813656368	2.983	30 kPa	DECMA
4292	0.54	44.7139107755192	2.868	30 kPa	DECMA
4293	0.55	44.1326354247563	2.819	30 kPa	DECMA
4294	0.56	44.0736402481112	2.771	30 kPa	DECMA
4295	0.57	43.5759567046897	2.704	30 kPa	DECMA
4296	0.58	43.7410712140208	2.725	30 kPa	DECMA
4297	0.59	44.0097122480807	2.798	30 kPa	DECMA
4298	0.6	44.6066712164612	2.85	30 kPa	DECMA
4299	0.61	45.2748636374641	2.873	30 kPa	DECMA
4300	0.62	46.0588915749828	3.017	30 kPa	DECMA
4301	0.63	47.240657562239	3.081	30 kPa	DECMA
4302	0.64	48.0612653876014	3.12	30 kPa	DECMA
4303	0.65	48.8054062834732	3.106	30 kPa	DECMA
4304	0.66	49.7012056809582	3.184	30 kPa	DECMA
4305	0.67	50.5979296811787	3.238	30 kPa	DECMA
4306	0.68	51.569136700113	3.147	30 kPa	DECMA
4307	0.69	52.6788426659905	3.18	30 kPa	DECMA
4308	0.7	53.3010445686271	3.145	30 kPa	DECMA
4309	0.71	54.1482834280259	3.203	30 kPa	DECMA
4310	0.72	55.3044738885214	3.168	30 kPa	DECMA
4311	0.73	56.1988902411862	3.271	30 kPa	DECMA
4312	0.74	57.3213687718743	3.272	30 kPa	DECMA
4313	0.75	58.2901450894052	3.362	30 kPa	DECMA
4314	0.76	59.0269221617491	3.351	30 kPa	DECMA
4315	0.77	59.9971786359008	3.449	30 kPa	DECMA
4316	0.78	60.4324241879804	3.532	30 kPa	DECMA
4317	0.79	60.5312676122191	3.639	30 kPa	DECMA
4318	0.8	60.9664012898078	3.584	30 kPa	DECMA
4319	0.81	60.8702217859111	3.501	30 kPa	DECMA
4320	0.82	60.5174800237174	3.517	30 kPa	DECMA
4321	0.83	60.1388692480936	3.413	30 kPa	DECMA
4322	0.84	60.0167619876086	3.428	30 kPa	DECMA
4323	0.85	60.2752842459259	3.539	30 kPa	DECMA
4324	0.86	60.6672631038431	3.834	30 kPa	DECMA
4325	0.87	61.8251978023331	4.596	30 kPa	DECMA
4326	0.88	63.2664729748639	5.308	30 kPa	DECMA
4327	0.89	66.8937287050252	6.27	30 kPa	DECMA
4328	0.9	70.5710122085658	7.34	30 kPa	DECMA
4329	0.91	74.893251573997	8.199	30 kPa	DECMA
4330	0.92	78.5731664390173	9.055	30 kPa	DECMA
4331	0.93	83.2789172201257	9.808	30 kPa	DECMA
4332	0.94	88.4718803835199	10.321	30 kPa	DECMA
4333	0.95	98.2435403655022	11.451	30 kPa	DECMA
4334	0.96	105.191904337441	12.921	30 kPa	DECMA
4335	0.97	110.167514749899	15.143	30 kPa	DECMA
4336	0.98	107.564949073123	15.959	30 kPa	DECMA
4337	0.99	98.245774079225	13.977	30 kPa	DECMA
4338	1	82.3035064318978	9.723	30 kPa	DECMA
