# Supplementary material for: Spatial patterning of liver progenitor cell differentiation mediated by cellular contractility and Notch signaling
Source: eLife journal article supplement (doi:10.7554/elife.38536), 2018-12-27
Supplement: supp [file elife-38536-supp-v1.zip › elife_poa_e38536_Figure_7_source_data_1.csv]

	Radius (dimensionless)	Cell type	OPN cell count
1	0	Control	0
2	0	shJag1	0
3	0	shDll1	0.167
4	0.033	Control	0
5	0.033	shJag1	0
6	0.033	shDll1	0.5
7	0.067	Control	0
8	0.067	shJag1	0
9	0.067	shDll1	1.167
10	0.1	Control	0
11	0.1	shJag1	0.167
12	0.1	shDll1	1.167
13	0.133	Control	0
14	0.133	shJag1	0.167
15	0.133	shDll1	1.333
16	0.167	Control	0
17	0.167	shJag1	0.167
18	0.167	shDll1	2
19	0.2	Control	0.167
20	0.2	shJag1	0
21	0.2	shDll1	3.167
22	0.233	Control	0
23	0.233	shJag1	0
24	0.233	shDll1	3.333
25	0.267	Control	0
26	0.267	shJag1	0
27	0.267	shDll1	3.5
28	0.3	Control	0
29	0.3	shJag1	0
30	0.3	shDll1	3.333
31	0.333	Control	0
32	0.333	shJag1	0.167
33	0.333	shDll1	3.167
34	0.367	Control	0
35	0.367	shJag1	0.333
36	0.367	shDll1	3.667
37	0.4	Control	0.167
38	0.4	shJag1	0.167
39	0.4	shDll1	2.833
40	0.433	Control	0
41	0.433	shJag1	0.167
42	0.433	shDll1	3.833
43	0.467	Control	0
44	0.467	shJag1	0.5
45	0.467	shDll1	5.333
46	0.5	Control	0
47	0.5	shJag1	0.167
48	0.5	shDll1	4.833
49	0.533	Control	0.167
50	0.533	shJag1	0.333
51	0.533	shDll1	7.167
52	0.567	Control	0.667
53	0.567	shJag1	0.167
54	0.567	shDll1	6.5
55	0.6	Control	0.833
56	0.6	shJag1	0.167
57	0.6	shDll1	9.667
58	0.633	Control	0.833
59	0.633	shJag1	0
60	0.633	shDll1	12
61	0.667	Control	1
62	0.667	shJag1	0.5
63	0.667	shDll1	13.333
64	0.7	Control	2.333
65	0.7	shJag1	0.833
66	0.7	shDll1	16.667
67	0.733	Control	4.667
68	0.733	shJag1	1
69	0.733	shDll1	18.167
70	0.767	Control	6.333
71	0.767	shJag1	1.333
72	0.767	shDll1	21.667
73	0.8	Control	9.333
74	0.8	shJag1	2.667
75	0.8	shDll1	30.333
76	0.833	Control	14
77	0.833	shJag1	3.167
78	0.833	shDll1	36.833
79	0.867	Control	21.167
80	0.867	shJag1	4.5
81	0.867	shDll1	44.167
82	0.9	Control	28
83	0.9	shJag1	2.667
84	0.9	shDll1	51
85	0.933	Control	32.167
86	0.933	shJag1	2.167
87	0.933	shDll1	49.833
88	0.967	Control	28
89	0.967	shJag1	4
90	0.967	shDll1	45.833
91	1	Control	15.667
92	1	shJag1	3.333
93	1	shDll1	32.667
