# Supplementary material for: Spatial patterning of liver progenitor cell differentiation mediated by cellular contractility and Notch signaling
Source: eLife journal article supplement (doi:10.7554/elife.38536), 2018-12-27
Supplement: supp [file elife-38536-supp-v1.zip › elife_poa_e38536_Figure_7_source_data_2.csv]

	Radius (dimensionless)	Cell type	HNF4A intensity (a.u.)
1	0	Control	1.007
2	0	shJag1	0.826
3	0	shDll1	0.71
4	0.033	Control	0.993
5	0.033	shJag1	0.797
6	0.033	shDll1	0.705
7	0.067	Control	0.967
8	0.067	shJag1	0.795
9	0.067	shDll1	0.717
10	0.1	Control	0.992
11	0.1	shJag1	0.792
12	0.1	shDll1	0.721
13	0.133	Control	0.983
14	0.133	shJag1	0.783
15	0.133	shDll1	0.707
16	0.167	Control	1.005
17	0.167	shJag1	0.775
18	0.167	shDll1	0.731
19	0.2	Control	0.993
20	0.2	shJag1	0.796
21	0.2	shDll1	0.715
22	0.233	Control	1.022
23	0.233	shJag1	0.773
24	0.233	shDll1	0.722
25	0.267	Control	1.001
26	0.267	shJag1	0.781
27	0.267	shDll1	0.721
28	0.3	Control	0.987
29	0.3	shJag1	0.771
30	0.3	shDll1	0.716
31	0.333	Control	0.984
32	0.333	shJag1	0.773
33	0.333	shDll1	0.723
34	0.367	Control	0.976
35	0.367	shJag1	0.771
36	0.367	shDll1	0.707
37	0.4	Control	0.97
38	0.4	shJag1	0.748
39	0.4	shDll1	0.707
40	0.433	Control	0.966
41	0.433	shJag1	0.766
42	0.433	shDll1	0.71
43	0.467	Control	0.974
44	0.467	shJag1	0.768
45	0.467	shDll1	0.693
46	0.5	Control	0.998
47	0.5	shJag1	0.759
48	0.5	shDll1	0.708
49	0.533	Control	0.982
50	0.533	shJag1	0.75
51	0.533	shDll1	0.693
52	0.567	Control	1.004
53	0.567	shJag1	0.75
54	0.567	shDll1	0.707
55	0.6	Control	1.007
56	0.6	shJag1	0.749
57	0.6	shDll1	0.693
58	0.633	Control	1.015
59	0.633	shJag1	0.75
60	0.633	shDll1	0.698
61	0.667	Control	1.052
62	0.667	shJag1	0.741
63	0.667	shDll1	0.697
64	0.7	Control	1.049
65	0.7	shJag1	0.74
66	0.7	shDll1	0.699
67	0.733	Control	1.058
68	0.733	shJag1	0.739
69	0.733	shDll1	0.7
70	0.767	Control	1.084
71	0.767	shJag1	0.728
72	0.767	shDll1	0.698
73	0.8	Control	1.088
74	0.8	shJag1	0.721
75	0.8	shDll1	0.709
76	0.833	Control	1.073
77	0.833	shJag1	0.716
78	0.833	shDll1	0.699
79	0.867	Control	1.033
80	0.867	shJag1	0.703
81	0.867	shDll1	0.688
82	0.9	Control	1.011
83	0.9	shJag1	0.687
84	0.9	shDll1	0.684
85	0.933	Control	0.963
86	0.933	shJag1	0.671
87	0.933	shDll1	0.656
88	0.967	Control	0.891
89	0.967	shJag1	0.661
90	0.967	shDll1	0.633
91	1	Control	0.856
92	1	shJag1	0.624
93	1	shDll1	0.596
