# Supplementary figures and images for: Spatial patterning of liver progenitor cell differentiation mediated by cellular contractility and Notch signaling
Source: eLife journal article supplement (doi:10.7554/elife.38536), 2018-12-27

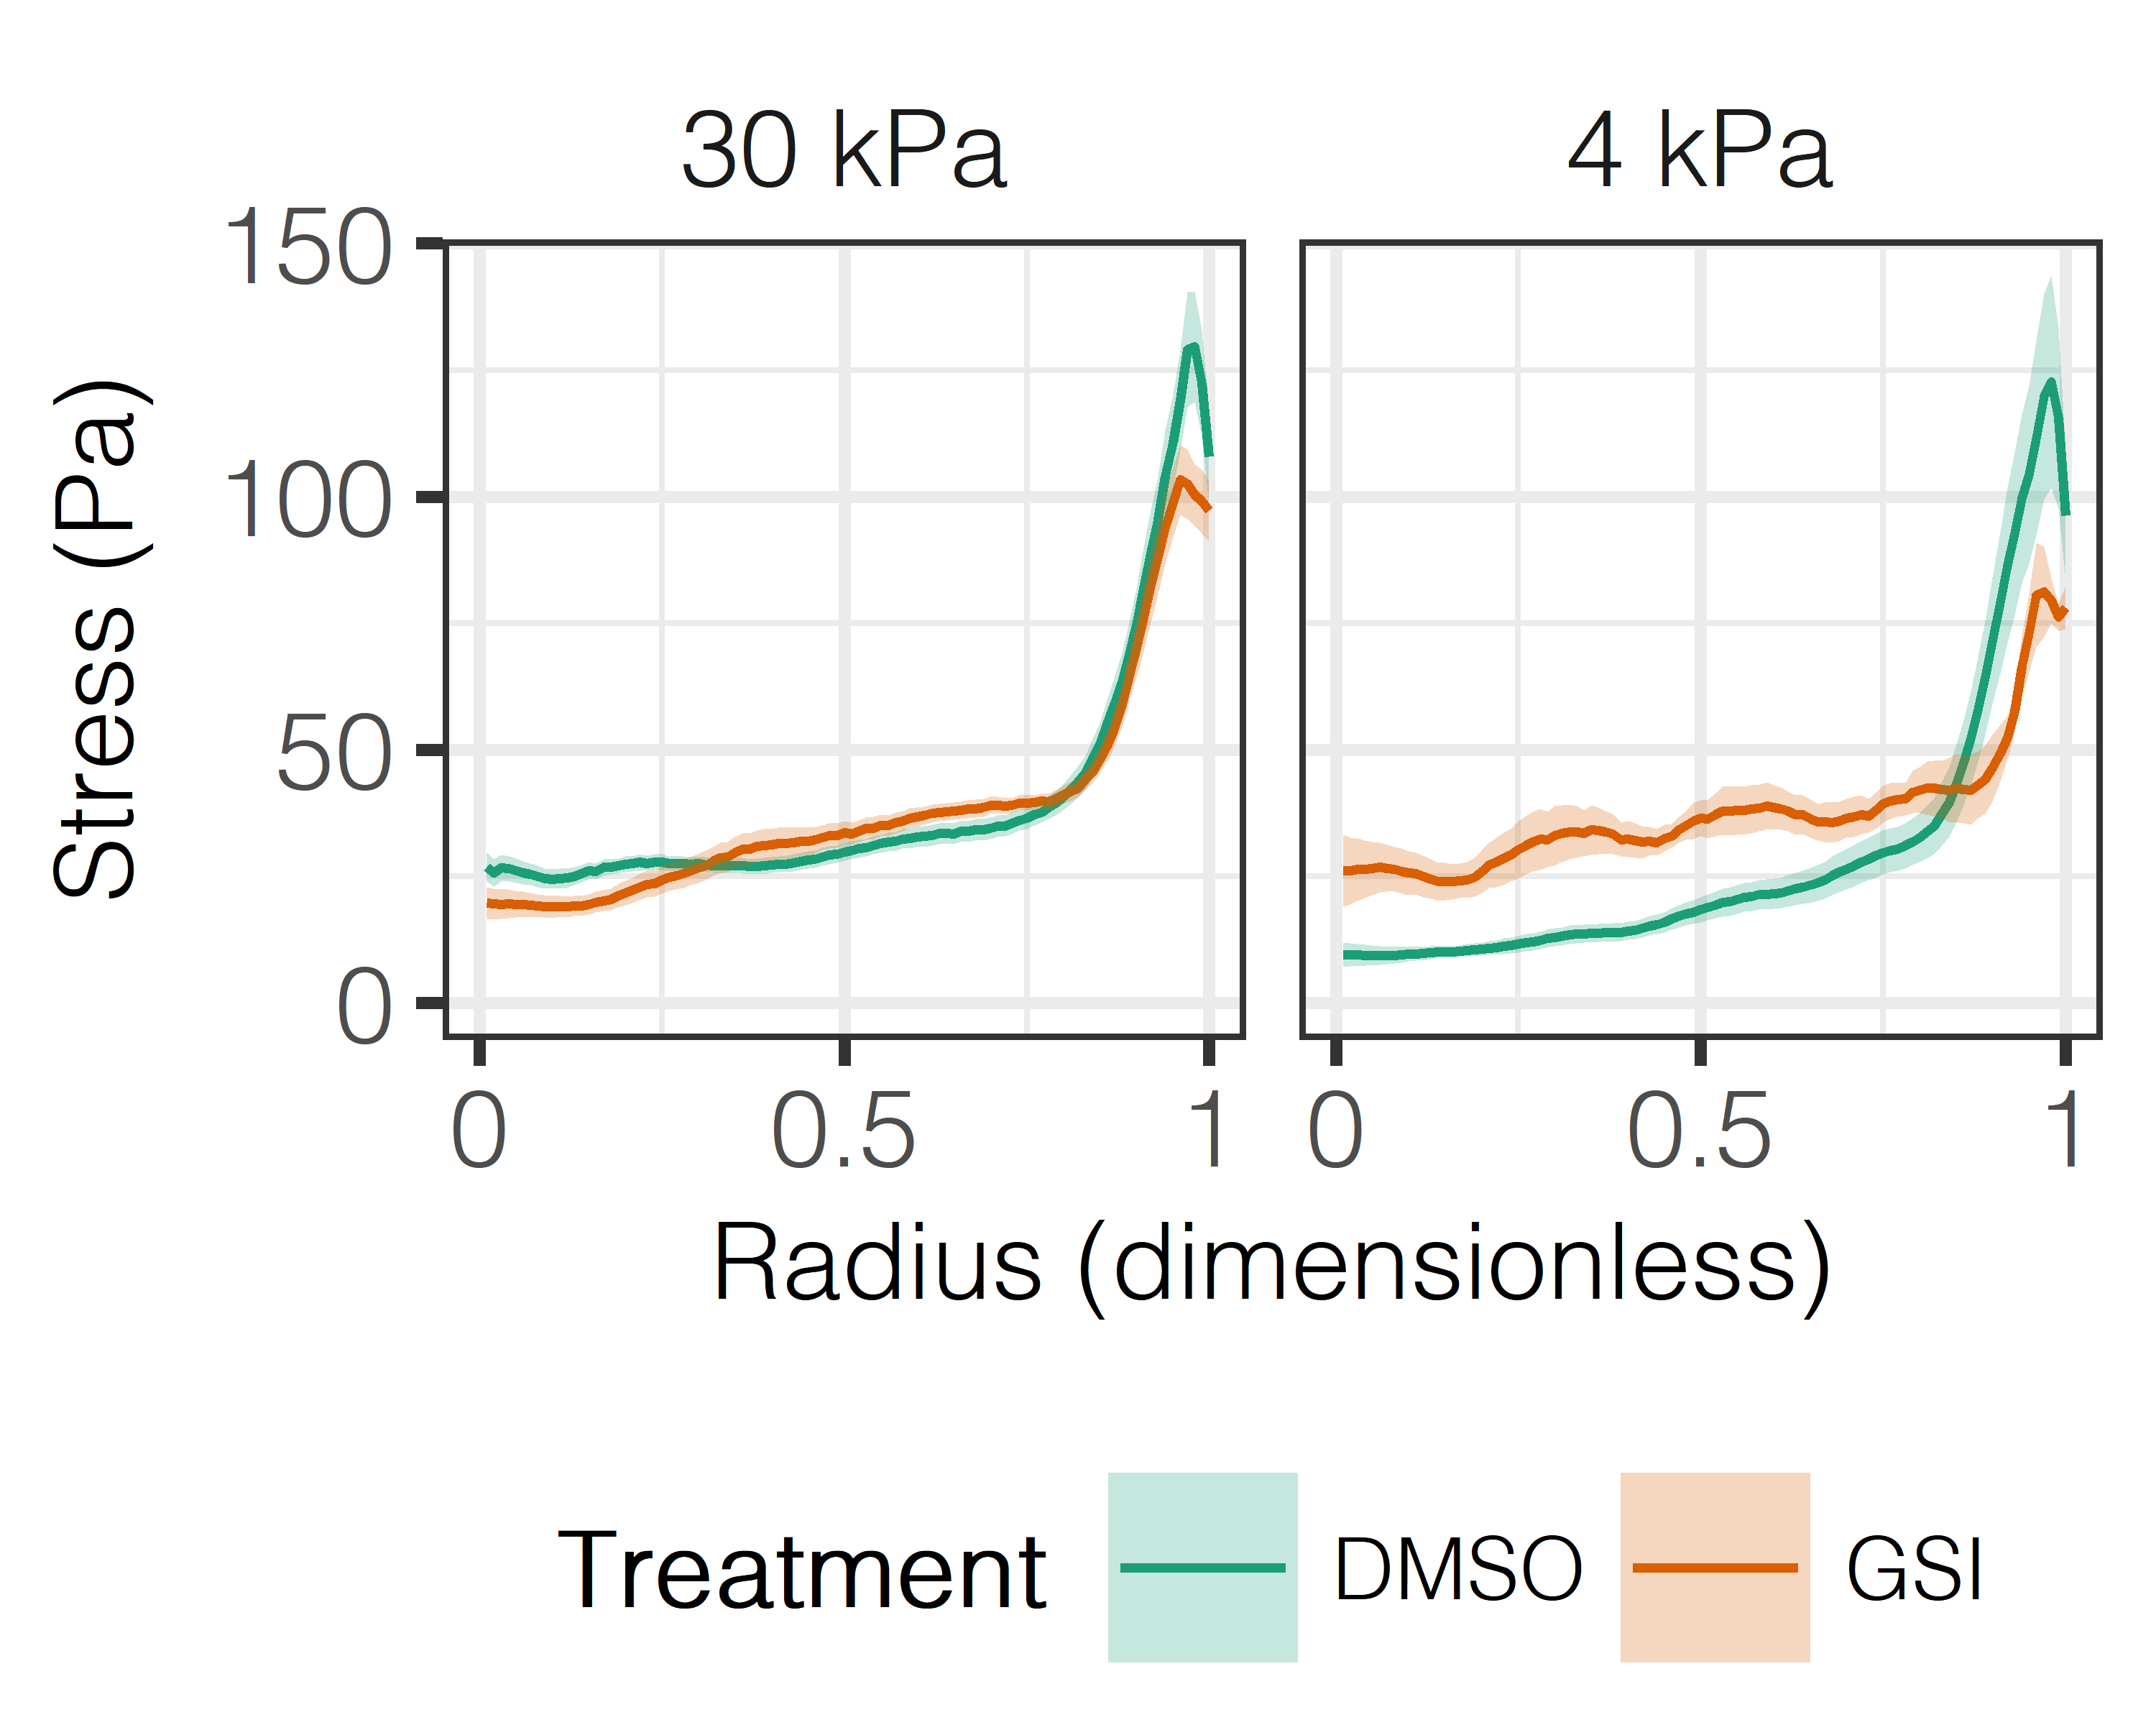

Supplement: supp [file elife-38536-supp-v1.zip › elife_poa_e38536_Figure_4_figure_supplement_1.png]

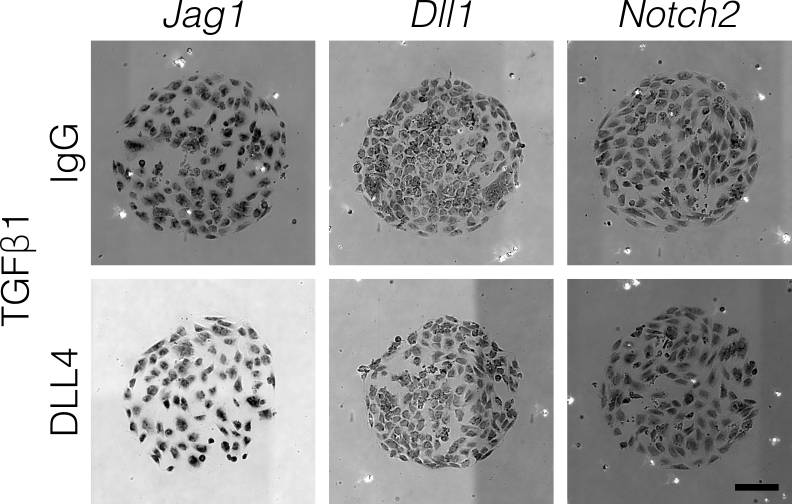

Supplement: supp [file elife-38536-supp-v1.zip › elife_poa_e38536_Figure_3_figure_supplement_2.png]

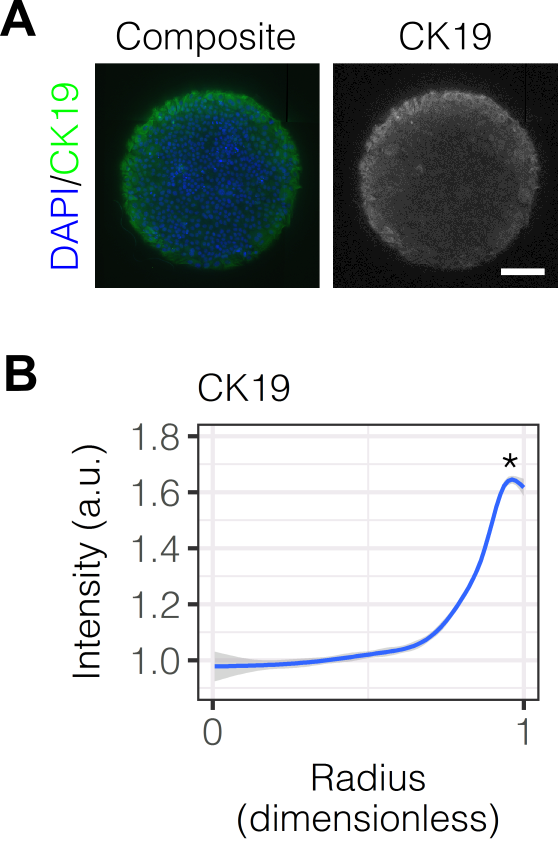

Supplement: supp [file elife-38536-supp-v1.zip › elife_poa_e38536_Figure_1_figure_supplement_1.png]

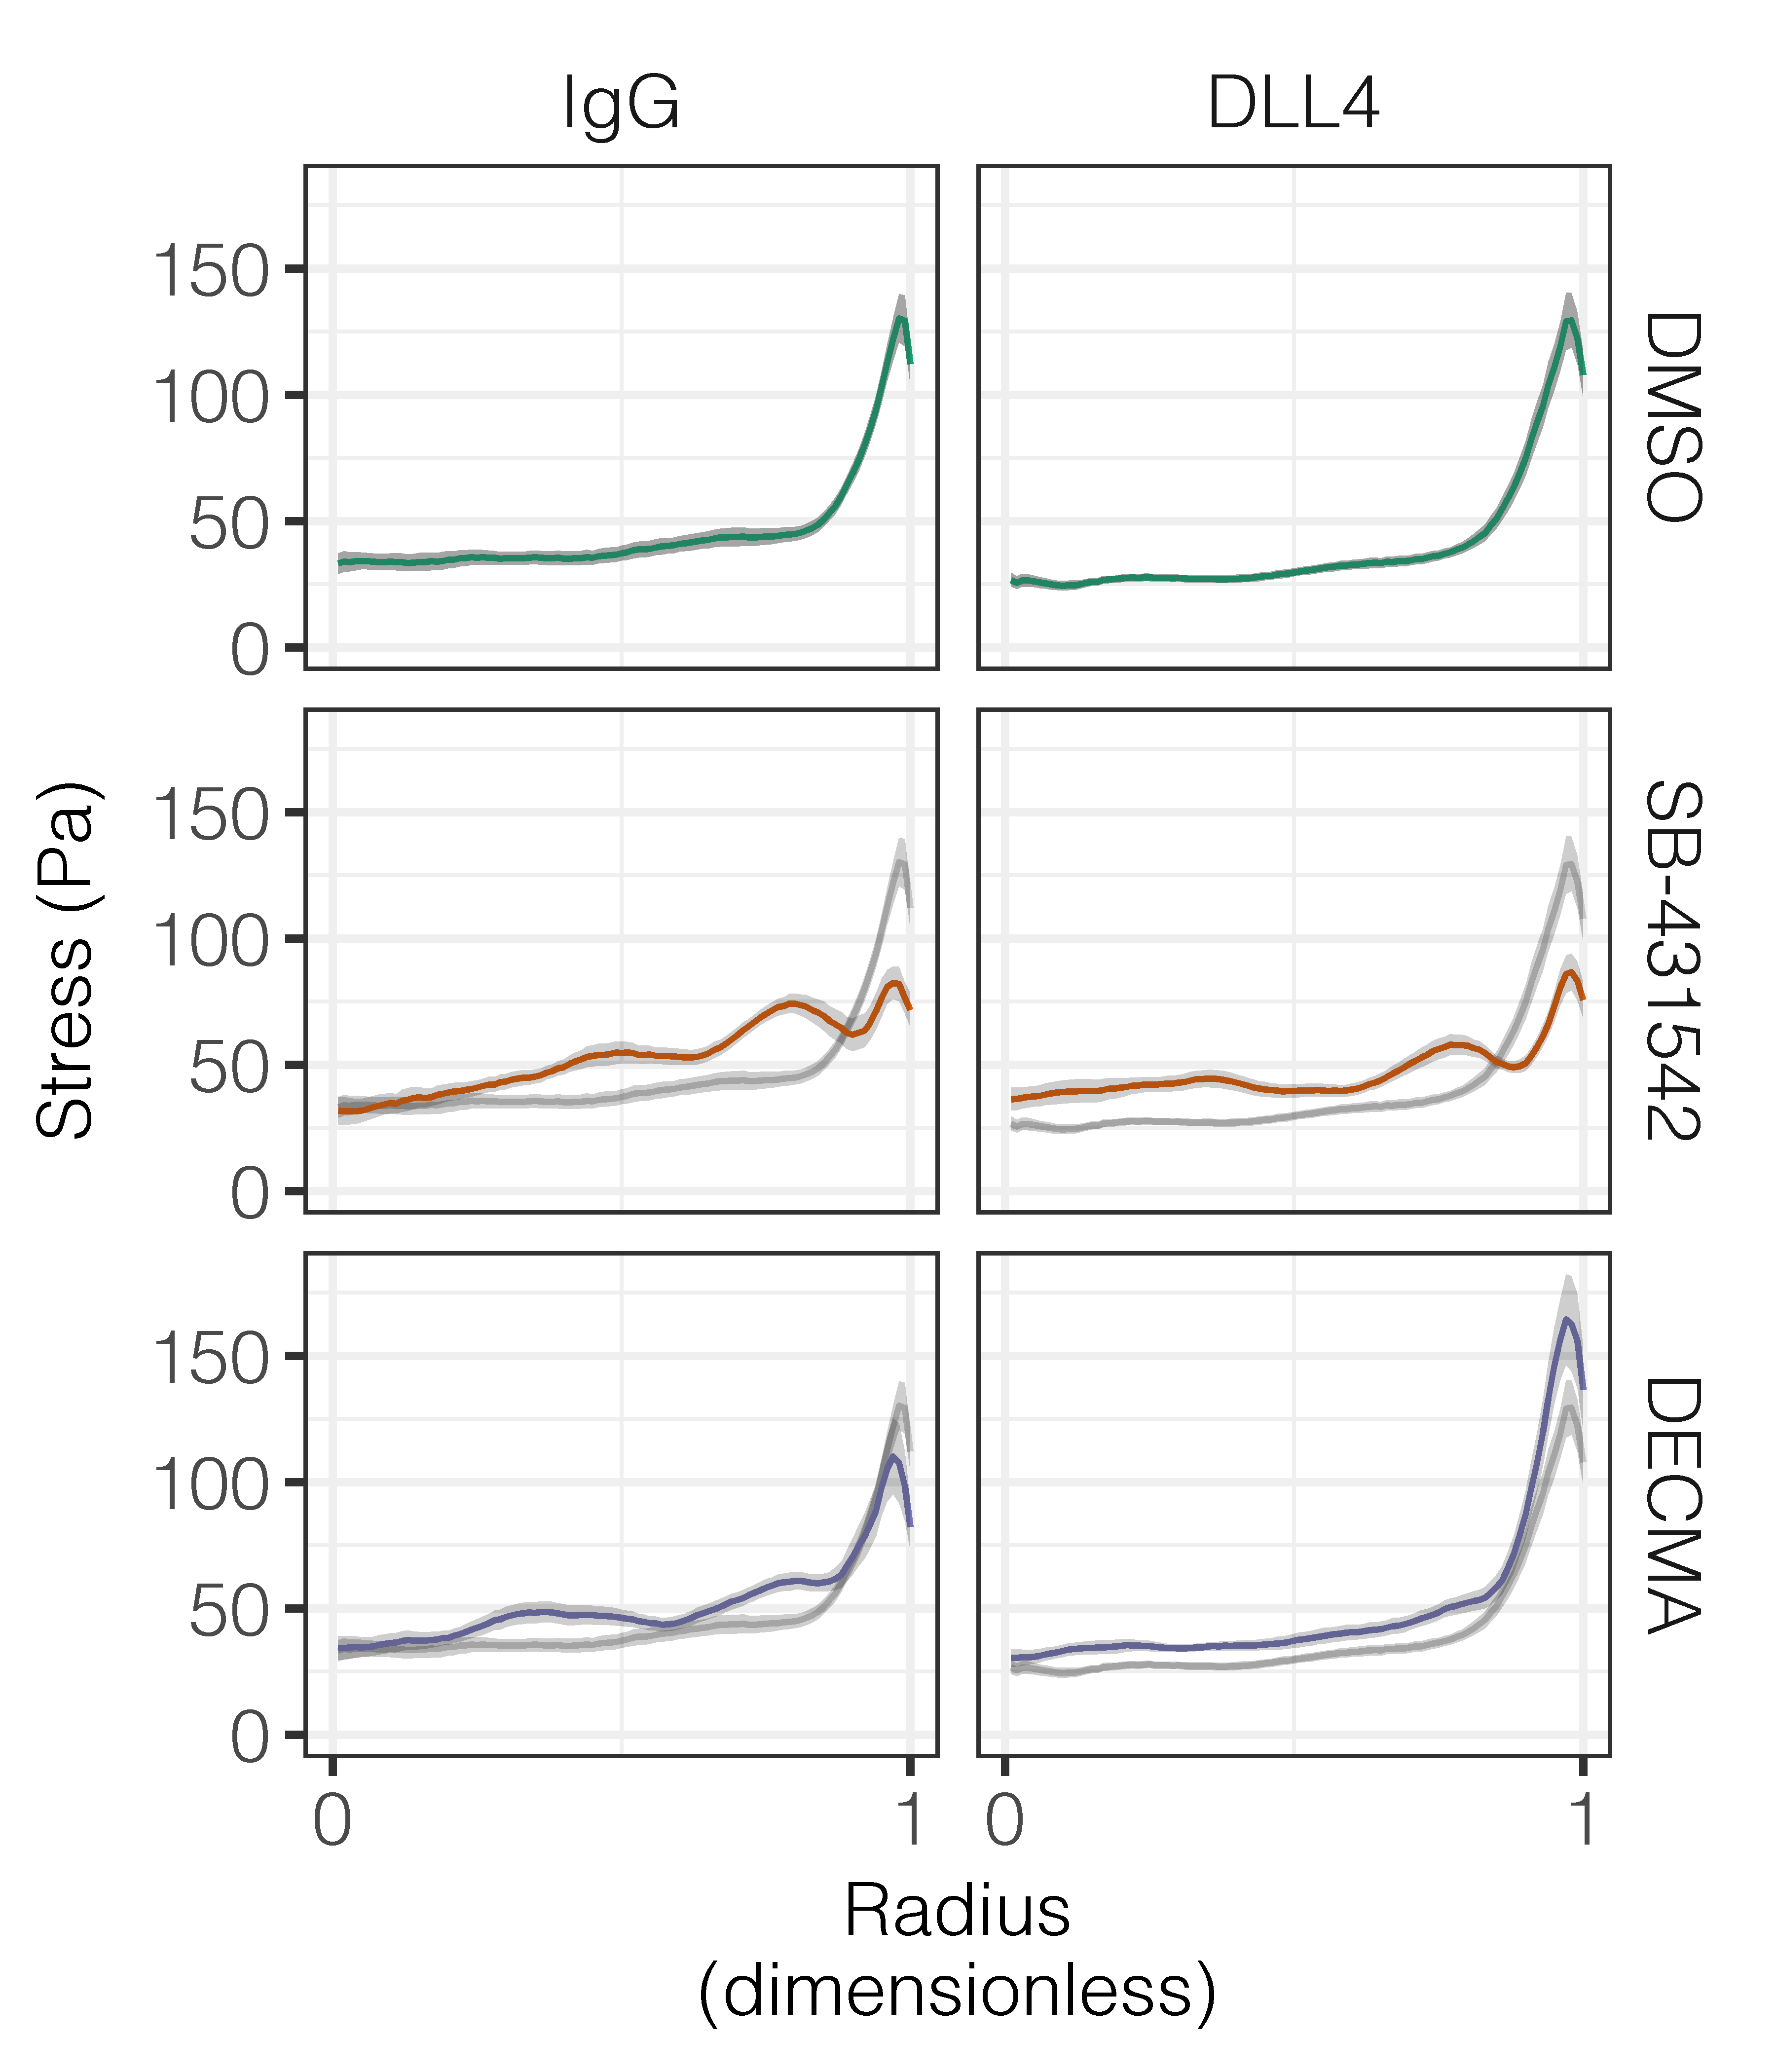

Supplement: supp [file elife-38536-supp-v1.zip › elife_poa_e38536_Figure_4_figure_supplement_2.png]

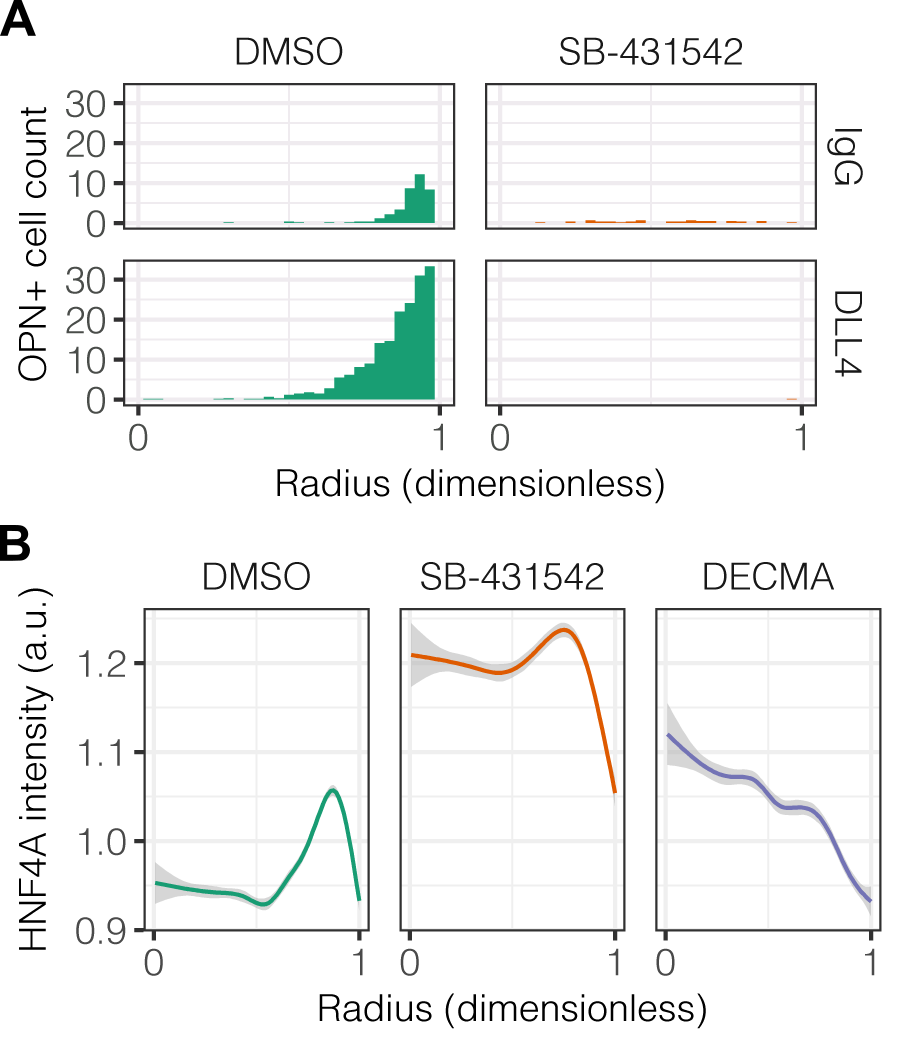

Supplement: supp [file elife-38536-supp-v1.zip › elife_poa_e38536_Figure_3_figure_supplement_1.png]

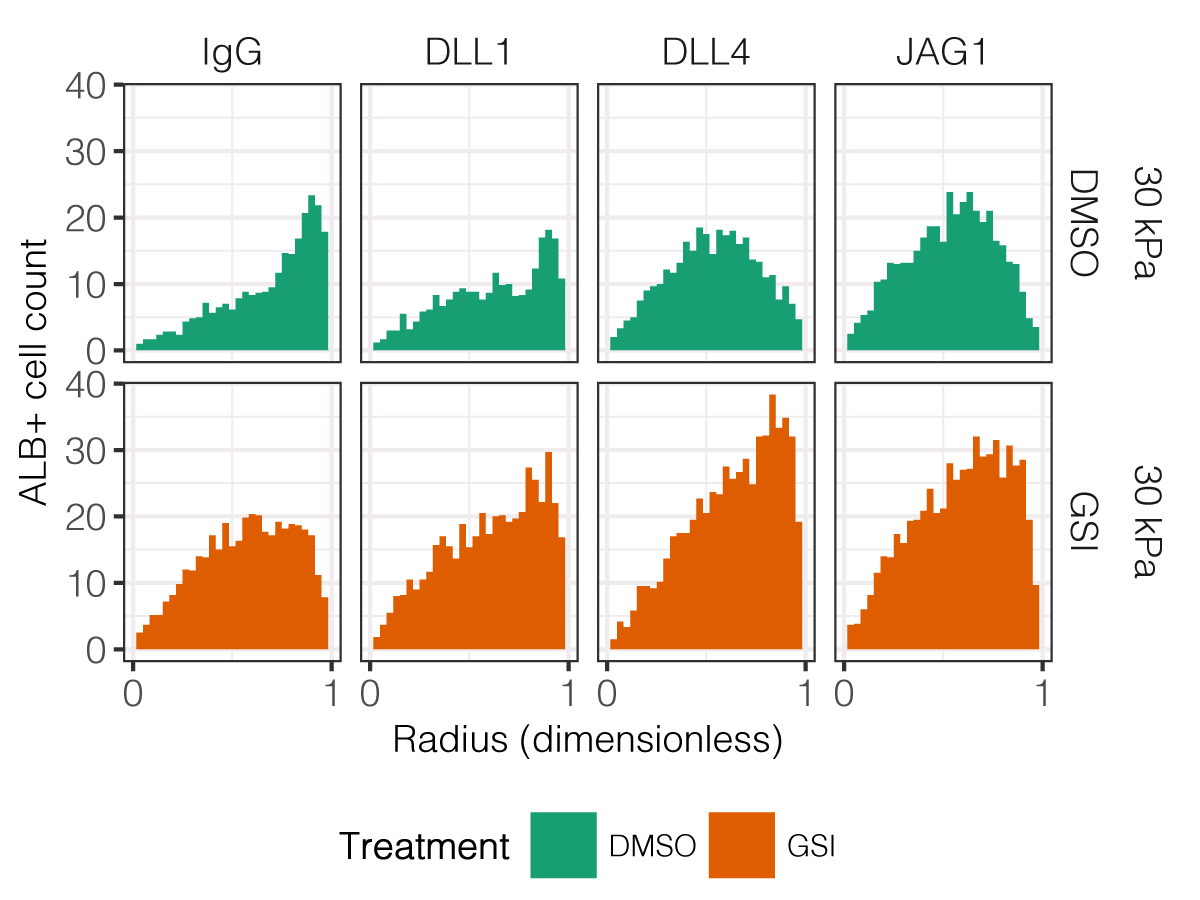

Supplement: supp [file elife-38536-supp-v1.zip › elife_poa_e38536_Figure_2_figure_supplement_3.png]

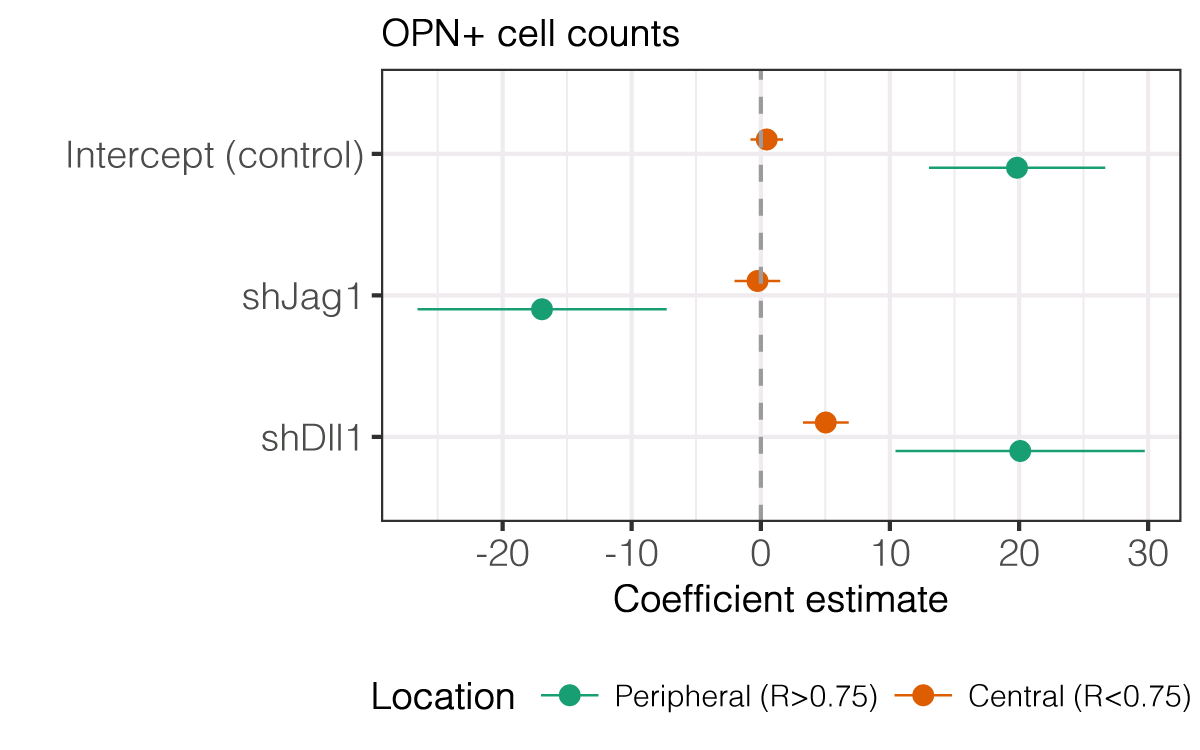

Supplement: supp [file elife-38536-supp-v1.zip › elife_poa_e38536_Figure_7_figure_supplement_1.png]

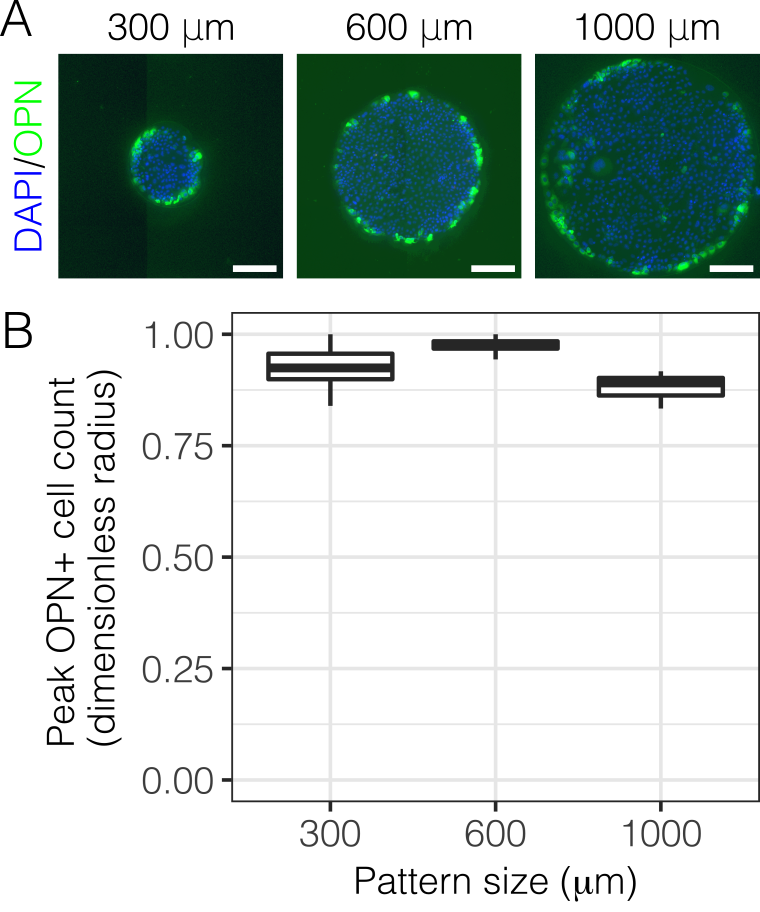

Supplement: supp [file elife-38536-supp-v1.zip › elife_poa_e38536_Figure_1_figure_supplement_3.png]

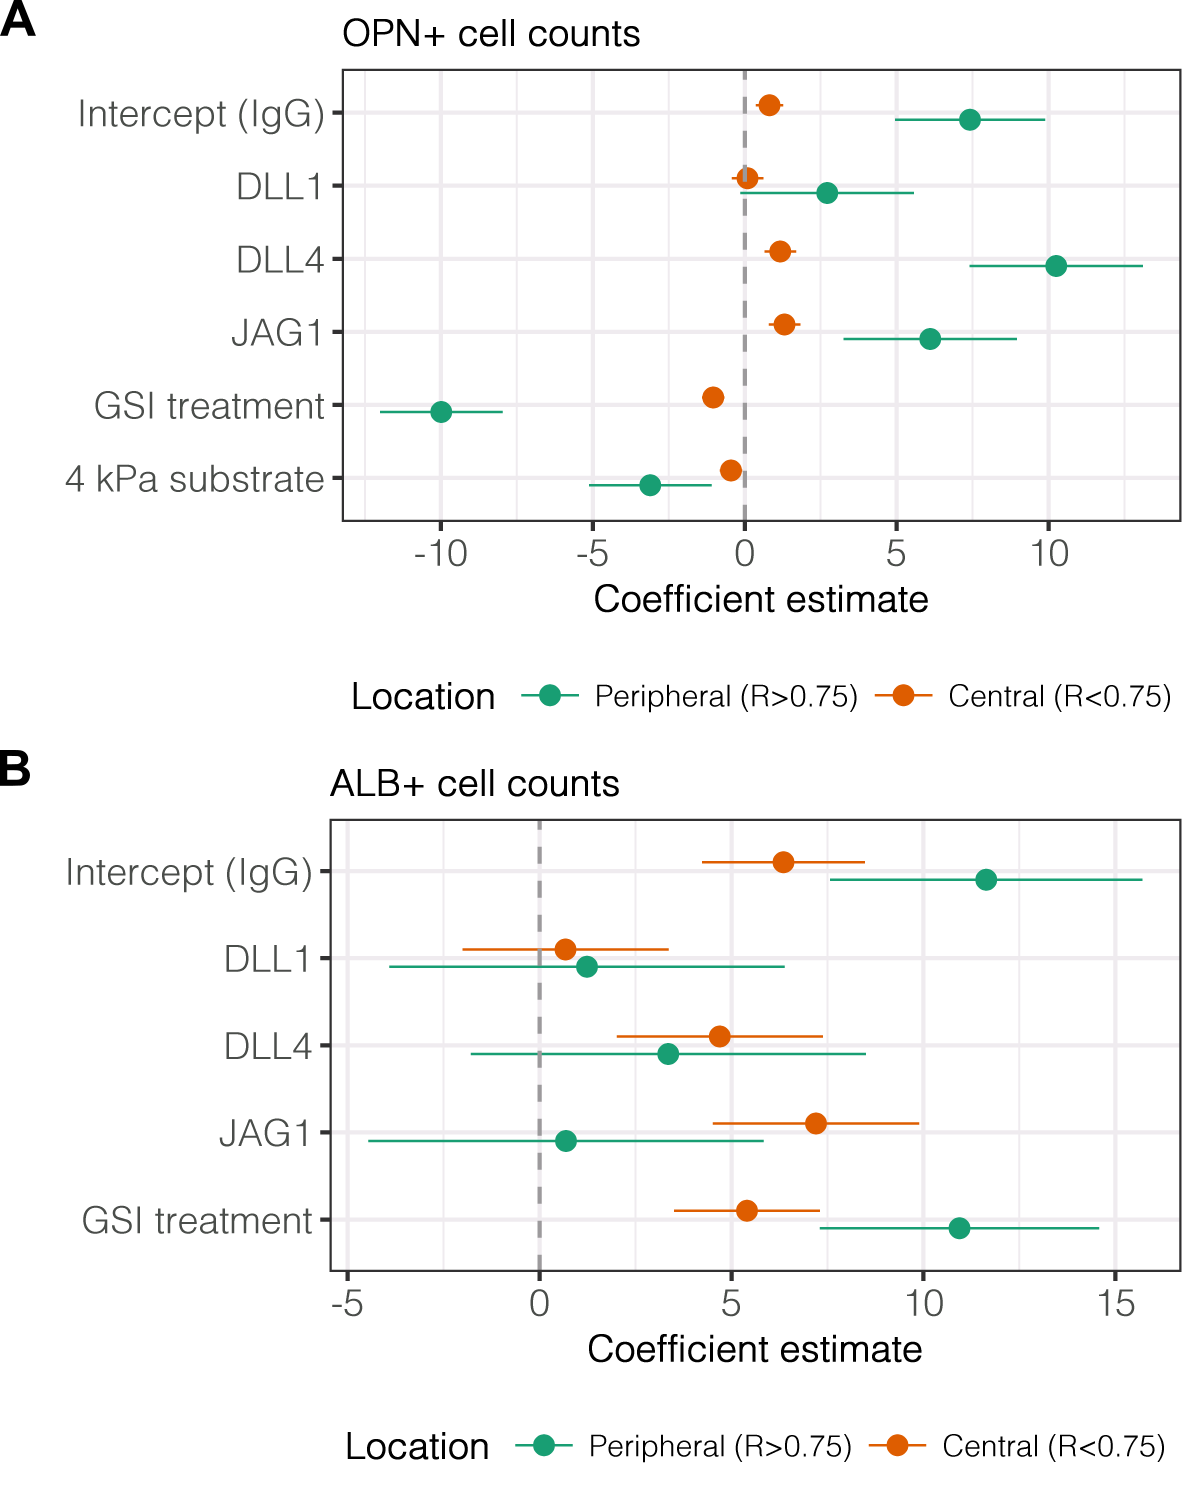

Supplement: supp [file elife-38536-supp-v1.zip › elife_poa_e38536_Figure_2_figure_supplement_2.png]

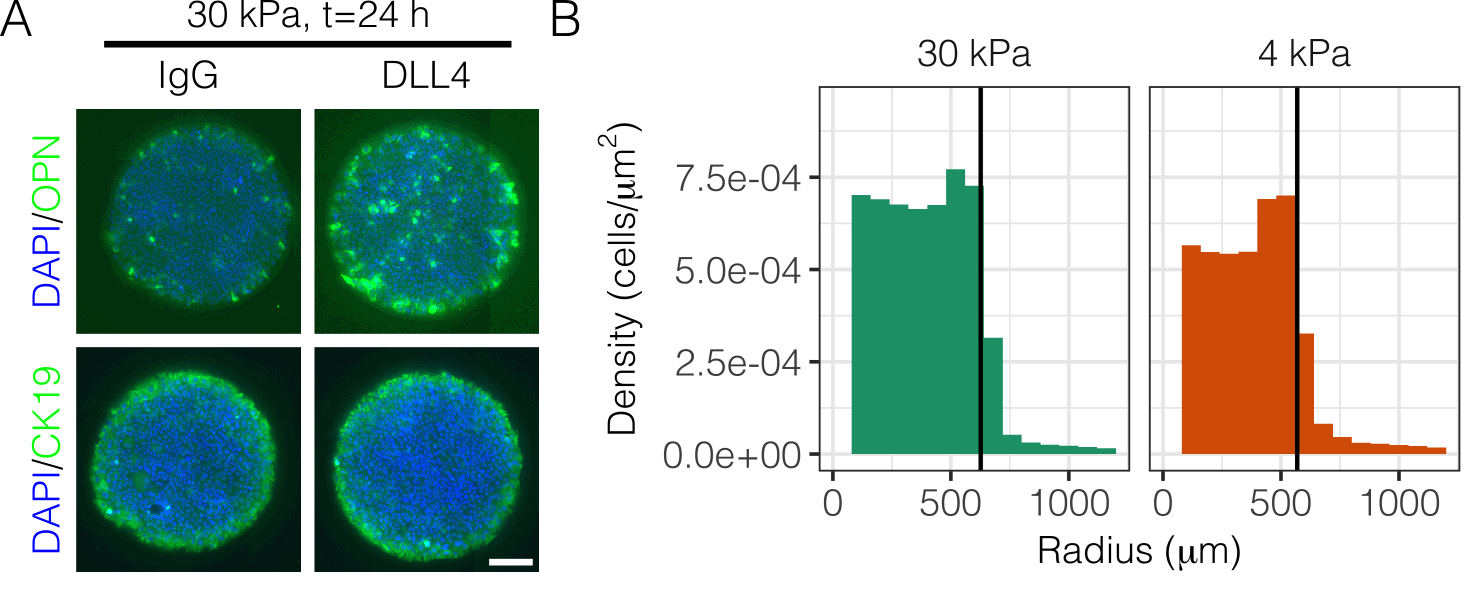

Supplement: supp [file elife-38536-supp-v1.zip › elife_poa_e38536_Figure_1_figure_supplement_2.png]

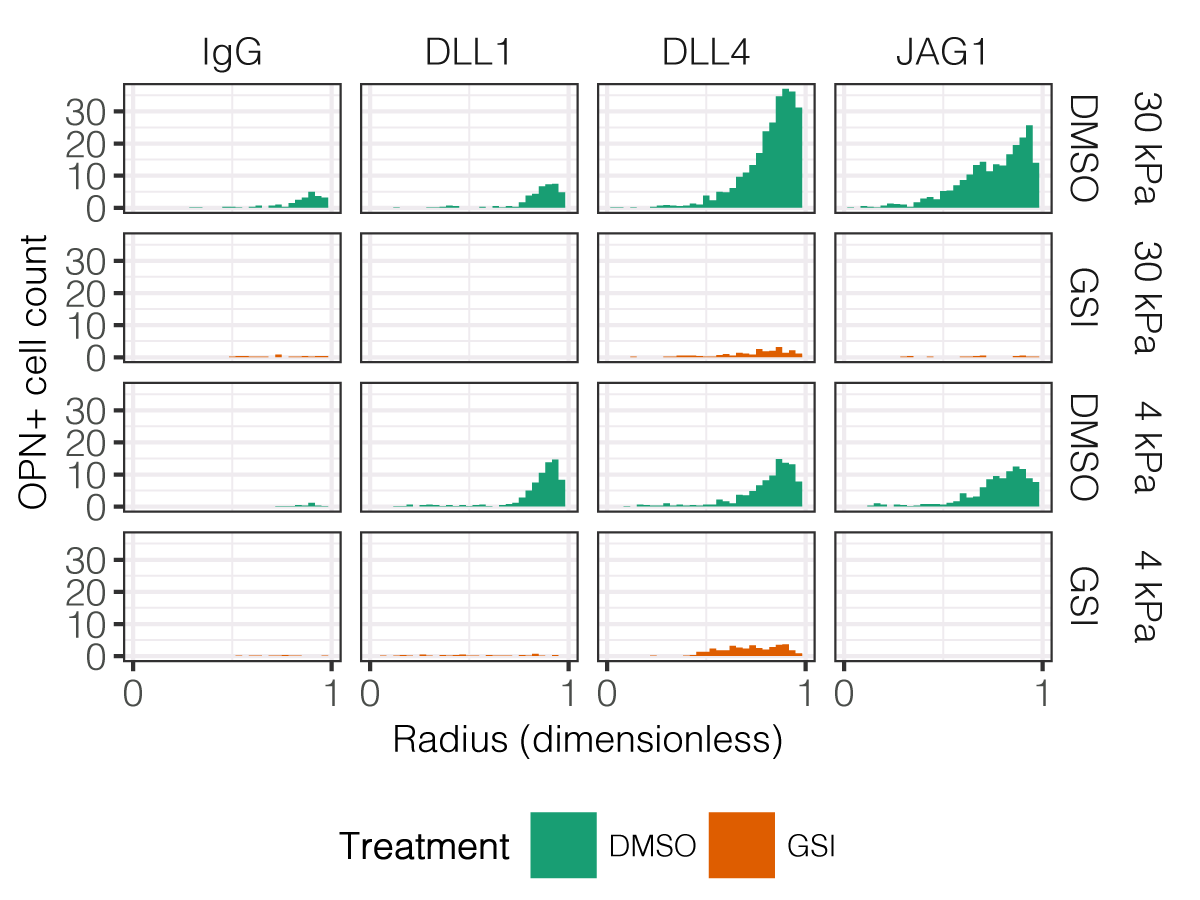

Supplement: supp [file elife-38536-supp-v1.zip › elife_poa_e38536_Figure_2_figure_supplement_1.png]
